## 1 **Widespread multi-targeted therapy resistance via drug-induced secretome fucosylation**

2  
3 Mark Borris D. Aldonza<sup>1,2,3,4,5,†</sup>, Junghwa Cha<sup>3,6,†</sup>, Insung Yong<sup>6,#</sup>, Jayoung Ku<sup>1,3,#</sup>, Dabin Lee<sup>4,5</sup>,  
4 Pavel Sinitcyn<sup>7</sup>, Ryeong-Eun Cho<sup>1,3</sup>, Roben D. Delos Reyes<sup>8</sup>, Dongwook Kim<sup>4,5</sup>, Hye-Jin  
5 Sung<sup>4,5</sup>, Soyeon Kim<sup>9,10</sup>, Minjeong Kang<sup>1,3</sup>, Yongsuk Ku<sup>1,3</sup>, Geonho Park<sup>1</sup>, Han Suk Ryu<sup>11</sup>,  
6 Sukki Cho<sup>12</sup>, Tae Min Kim<sup>9,10</sup>, Pilnam Kim<sup>3,6,‡,\*</sup>, Je-Yoel Cho<sup>4,5,‡,\*</sup>, Yoosik Kim<sup>1,3,‡,\*</sup>  
7  
8

9 <sup>1</sup>Department of Chemical and Biomolecular Engineering, Korea Advanced Institute of  
10 Sciences and Technology (KAIST), Daejeon 34141, Korea.  
11

12 <sup>2</sup>Department of Biological Sciences, KAIST, Daejeon 34141, Korea.  
13

14 <sup>3</sup>KI for Health Science and Technology (KIHST), KAIST, Daejeon 34141, Korea.  
15

16 <sup>4</sup>Department of Biochemistry, College of Veterinary Medicine, Seoul National University, Seoul  
17 151-742, Korea.  
18

19 <sup>5</sup>BK21 PLUS Program for Creative Veterinary Science Research and Research Institute for  
20 Veterinary Science, Seoul National University, Seoul 151-742, Korea.  
21

22 <sup>6</sup>Department of Bio and Brain Engineering, KAIST, Daejeon 34141, Korea.  
23

24 <sup>7</sup>Computational Systems Biochemistry Research Group, Max Planck Institute of Biochemistry,  
25 82152 Martinsried, Germany.  
26

27 <sup>8</sup>Department of Electrical Engineering, KAIST, Daejeon 34141, Korea.  
28

29 <sup>9</sup>Department of Internal Medicine, Seoul National University Hospital, Seoul 03080, Korea.  
30

31 <sup>10</sup>Cancer Research Institute, Seoul National University College of Medicine, Seoul 03080,  
32 Korea.  
33

34 <sup>11</sup>Department of Pathology, Seoul National University Hospital, Seoul National University  
35 College of Medicine, Seoul 03080, Korea.  
36

37 <sup>12</sup>Department of Thoracic and Cardiovascular Surgery, Seoul National University Bundang  
38 Hospital, Seongnam 13620, Republic of Korea.  
39

40 \*Corresponding author. Email: [ysyoosik@kaist.ac.kr](mailto:ysyoosik@kaist.ac.kr) (Y.K.); [jeicho@snu.ac.kr](mailto:jeicho@snu.ac.kr) (J.Y.C.);  
41 [pkim@kaist.ac.kr](mailto:pkim@kaist.ac.kr) (P.K.)  
42  
43  
44

45 †These authors contributed equally to this work as co-first authors.  
46

47 #These authors contributed equally to this work as co-second authors.  
48

49 ‡These authors contributed equally to this work as co-senior authors.  
50  
51

52 **Running title:** Targeted therapy resistance via secretome fucosylation.  
53  
54

55  
56  
57  
58  
59  
60  
61  
62  
63  
64  
65  
66  
67  
68  
69  
70  
71  
72  
73  
74  
75  
76  
77  
78  
79  
80  
81  
82  
83  
84  
85  
86  
87  
88  
89  
90  
91  
92  
93  
94  
95  
96  
97  
98  
99  
100  
101  
102  
103  
104  
105  
106  
107  
108

## Abstract

Cancer secretome is a reservoir for aberrant glycosylation. How therapies alter this post-translational cancer hallmark and the consequences thereof remain elusive. Here we show that an elevated secretome fucosylation is a pan-cancer signature of both response and resistance to multiple targeted therapies. Large-scale pharmacogenomics revealed that fucosylation genes display widespread association with resistance to these therapies. In both cancer cell cultures and patients, targeted kinase inhibitors distinctively induced core fucosylation of secreted proteins less than 60 kDa. Label-free proteomics of N-glycoproteomes revealed that fucosylation of the antioxidant PON1 is a critical component of the therapy-induced secretome. Core fucosylation in the Golgi impacts PON1 stability and folding prior to secretion, promoting a more degradation-resistant PON1. Non-specific and PON1-specific secretome de-N-glycosylation both limited the expansion of resistant clones in a tumor regression model. Our findings demonstrate that core fucosylation is a common modification indirectly induced by targeted therapies that paradoxically promotes resistance.

Keywords: fucosylation, n-linked glycosylation, targeted therapy, secretome, resistance

109  
110  
111  
112  
113  
114  
115  
116  
117  
118  
119  
120  
121  
122  
123  
124  
125  
126  
127  
128  
129  
130  
131  
132  
133  
134  
135  
136  
137  
138  
139  
140  
141  
142  
143  
144  
145  
146  
147  
148  
149  
150  
151  
152  
153  
154  
155  
156  
157  
158  
159  
160  
161  
162

## Introduction

Complete responses to targeted therapies remain rare for a vast majority of cancer patients<sup>[1]</sup>. While long-term disease stabilization can be achieved by therapeutic inhibition of oncogenic drivers, resistance to this targeted strategy is inevitable<sup>[1,2,3]</sup>. In the clinic, partial remission can be achieved by classes of inhibitors that target amplified or mutationally activated kinases such as EGFR mutations or ALK translocations in lung adenocarcinoma, BRAF mutations in melanoma, or HER2 amplifications in breast cancer<sup>[3,4,5]</sup>. Both genetic and non-genetic mechanisms of resistance to these inhibitors exist<sup>[6]</sup>. However, the innate nature of many of these resistance acquisition models precludes the critical role of the tumor microenvironment (TME) in contributing to an incomplete tumor regression after therapy. For instance, a complex network of secreted signals from drug-stressed tumors termed therapy-induced secretomes (TIS) was shown to facilitate the selective expansion of a small number of pre-existing resistant clones, paradoxically explaining relapse to targeted therapy<sup>[7]</sup>. Systemic understanding of this therapy-induced niche could lead to a paradigm shift in our current management of clinical drug resistance in cancer.

The cancer secretome comprises a set of secreted proteins that is pro-tumorigenic in nature. Many components of this secretome serve as disease biomarkers and are major druggable targets<sup>[8]</sup>. Both classical and non-classical pathways regulate the secretion of these components including extracellular matrix proteins, exosomes, growth factors, cytokines, shed receptors, and proteases<sup>[8,9,10]</sup>. During stress, these secretome components are remodeled depending on tissue architecture and cell composition of the TME, stress-inducing stimuli, or conditions that affect liver homeostasis—a systemic dictator of the secretome and plasma proteome states<sup>[11,12]</sup>. Substantially, secreted soluble proteins undergo post-translational modifications (PTMs) that functionally predominate their trafficking, stability, and folding prior to secretion<sup>[13]</sup>. These PTMs in the secretory pathway are constantly employed to form tumorigenic niches upon chemotherapy, radiotherapy, targeted therapy, or immunotherapy<sup>[13,14,15]</sup>. Among these PTMs, phosphorylation and glycosylation are the most common. Glycosylation—the covalent addition of sugar moieties to target scaffolds—is the most abundant PTM of the secretome, as nearly all secreted mammalian proteins have at least one glycan, a sugar-based assembly, attached to them at a specific site<sup>[16,17]</sup>. For example, therapy-induced apoptotic disassembly of the Golgi is associated with the anomalous synthesis of specific glycan types<sup>[18,19]</sup>. In some cases, direct glycosylation of apoptotic signals upon therapy can restrain or trigger their cell killing capacity<sup>[20]</sup>. Moreover, therapies that act as endoplasmic reticulum (ER) stressors can inhibit protein glycosylation and reduce disulfide bonds initiating an unfolded protein response (UPR)<sup>[21,22]</sup>. While there is little evidence suggesting a post-ER quality control that operates at the Golgi following UPR, stress-induced regulation of terminal glycosylation is a complementary mechanism of Golgi-localized machinery that predominates the assembly of newly synthesized secretory proteins<sup>[23]</sup>.

An abnormal glycome is a cancer hallmark<sup>[24]</sup>. Cancer-specific changes in two of the most frequent glycosylation types, O- and N-linked glycosylation, are coordinated with expression of genes encoding for glycosyltransferases—enzymes that catalyze glycosidic linkages—and glycosidases—enzymes that cleave glycosidic bonds—and their localization within the secretory pathway (Golgi apparatus and ER)<sup>[24]</sup>. Although we note that expression of other enzyme-coding genes (i.e., those involved in sugar metabolism and transport and glycan sulfation) are also relevant for understanding aberrant glycosylation. Malignant transformation predominantly displays distinct N-glycomes. Throughout this process, unique alterations in both glycan level and composition, their conjugation and linkages, are reflected in the cell surface, intracellular, and extracellular scaffolds of mostly lipids and proteins<sup>[25,26]</sup>. Lewis antigens, components of exocrine epithelial secretions, are among the most frequently

163 overexpressed fucosylated epitopes during carcinogenesis<sup>[27]</sup>. Most obviously, this is  
164 attributed to the extensive activity of glycosyltransferases, mainly by fucosyltransferases  
165 (FUTs)<sup>[28]</sup>. However, more nuanced and complicated dysregulations can arise from incomplete  
166 synthesis–truncated glycosylation common in early carcinogenesis–or neo-synthesis–de novo  
167 production of atypical glycosylation patterns–which are mediated by a complex interplay of  
168 glycosyltransferases such as FUTs and other factors that regulate fucose metabolism in the  
169 Golgi/ER<sup>[17,29]</sup>. As a result, several types of Lewis antigens, including sialylated Lewis  
170 structures, are currently being utilized in the clinic as prognostic cancer biomarkers<sup>[27,29]</sup>. Given  
171 that these glycan alterations influence the cancer secretome, therapy-induced remodeling of  
172 the local TME, particularly its secreted components, must involve modified functionalities in  
173 the multi-step process of glycosylation.

174  
175 Here, we identify that core fucosylation, modification at the N-glycan core, is a major post-  
176 translational signature of the pan-cancer TIS. Using pharmacogenomics, label-free  
177 proteomics, and a panoply of perturbation assays, we reveal that the therapy-induced  
178 aberration in secretome fucosylation involves (i) a differential induction of relatively smaller  
179 fucosylated proteins (<60 kDa), (ii)  $\alpha$ 1,6-fucosyltransferase (FUT8)-dependent transfer of  
180 GDP- $\beta$ -l-fucose (GDP-Fuc) onto N-glycan core structures in the Golgi compartment, (iii)  
181 expression of fucose salvage genes and the GDP-Fuc transporter SLC35C1, and most  
182 significantly, (iv) core fucosylation of the antioxidant paraoxonase 1 (PON1). By utilizing  
183 several cellular models of drug resistance paired with patient specimens, we show that an  
184 elevated secretome fucosylation is likely a complementary mechanism of cancer relapse and  
185 targeted therapy resistance. In addition to uncovering the regulation of this TIS modification,  
186 we tested the functional consequences of generally blocking secretome core fucosylation or  
187 specifically constraining fucosylated PON1. Indeed, secretome de-N-glycosylation by a  
188 glycosidase, fucosylation inhibition by FUT8 or SLC35C1 RNA interference (RNAi), or site-  
189 specific blockade of PON1 core fucosylation dramatically prevented TIS-directed rebound of  
190 minority resistant clone population in a regressing heterogeneous cell pool. Furthermore, a  
191 targeted screen and transcriptome-wide gene expression analysis unveil effectors of redox  
192 stress sensing and the UPR as secretome fucosylation-specific resistance modulators. Our  
193 findings point to a new view of the TIS that extends its role in establishing a resistance-  
194 promoting microenvironment niche via core fucosylation.

195

## 196 **Results**

197

### 198 **Core fucosylation of therapy-induced cancer secretomes.**

199

200 While fucose is naturally present in a variety of glycolipids and glycoproteins, fucose moieties  
201 on N-glycans of secreted proteins are often dysregulated in cancer and are among the most  
202 aberrant sugar moieties of cancer glycoproteomes<sup>[16]</sup>. How therapies alter their on-site  
203 linkages and regulate their overall levels remain obscure. We investigated whether  
204 fucosylation is correlated with drug sensitivity by comprehensive mining of available data on  
205 genes involved in fucose metabolism (FUK, FPGT, FX, GMDS), fucosylation branching [FUTs,  
206 protein O-fucosyltransferases (POFUTs)], and GDP-Fuc transport (SLC35C1) in the  
207 Genomics of Drug Sensitivity in Cancer (GDSC) and the Cancer Cell Line Encyclopedia  
208 (CCLE), two of the largest publicly available pharmacogenomics data sets<sup>[30,31]</sup>. We first  
209 evaluated the consistency of the pharmacogenomic data from the two datasets. Comparative  
210 analysis using the correlation between FUT gene expression and overall drug sensitivity (IC50  
211 for GDSC and area under the curve, AUC for CCLE) as a metric showed that the molecular  
212 data are in concordance despite the apparent differences in cell lines and drug components  
213 (**Supplemental Fig. 1**). Although we should emphasize that there are obvious variabilities  
214 between the two datasets (i.e., variation in FUT expression values) that should be taken into  
215 consideration which might be the result of different cell lines representing a cancer lineage,  
216 assay protocols, or culture media used. We can only argue that investigating the potential

217 confounding roles of such factors is an avenue for a separate study. Regardless, the  
218 consistent correlation between FUT expression and drug sensitivity reiterates the findings of  
219 previous efforts that looked into the reproducibility and biological consilience between profiling  
220 data from GDSC and CCLE<sup>[32,33]</sup>.

221  
222 Upon clustering of cell line-derived data into 30 cancer types, we determined univariate  
223 correlation between gene expression and a summary drug response measure (based on IC50  
224 or AUC means). Spearman's correlation coefficient indicated that there is a variable but  
225 widespread association between fucosylation gene expression and drug resistance in both  
226 data sets (**Fig. 1A** and **Supplemental Fig. 2A**). Of interest in terms of its consistent high pan-  
227 cancer expression profile in both data sets is FUT8—notably the only enzyme-encoding gene  
228 known to directly mediate core fucosylation via N-linkages<sup>[34]</sup>. To scrutinize whether the  
229 correlation between FUT8 expression and drug resistance is significantly cumulated in drug-  
230 resistant cells, we categorized cell lines that are either sensitive or resistant based on the  
231 generalized drug response measurement and determined their correlation per class of drugs  
232 (**Fig. 1B**). Indeed, FUT8 broadly correlated with resistance to a variety of compounds but more  
233 strongly to inhibitors of receptor tyrosine kinase (RTK), epidermal growth factor receptor  
234 (EGFR), and insulin-like growth factor receptor (IGFR). Across all compound types, resistance  
235 to targeted therapies displayed the strongest correlation with FUT8 expression. Moreover, cell  
236 lines that contain mutations near or specifically at GDP-Fuc binding sites (resulting in amino  
237 acid change that eliminates or decrease fucosylation) in FUTs or other fucosylation genes  
238 collectively exhibited higher sensitivity to drugs (**Fig. 1A** and **Supplemental Fig. 2, B and C**).

239  
240 In a separate analysis of the Cancer Therapeutics Response Portal (CTRP), a large-scale  
241 small molecule sensitivity data set, using the Computational Analysis of Resistance (CARE)  
242 scoring algorithm<sup>[35]</sup>, we showed that fucosylation gene expression displays significant  
243 correlation with resistance to kinase inhibitors (data on at least 84 drugs; **Supplemental Fig.**  
244 **1, D and E**). In addition, using publicly available microarray and RNA-seq data, we found that  
245 high expressions of FUK, SLC35C1, and FUT8 are generally correlated with poor first  
246 progression or relapse-free survival (RFS) in various cancer patient cohorts (**Supplemental**  
247 **Fig. 3**).

248  
249 Given that many of the target N-glycoprotein scaffolds of FUT8-mediated fucosylation are  
250 secreted<sup>[34]</sup>, we next asked whether the association between fucosylation gene expression  
251 and drug resistance is interrelated with expression changes in the components of the core  
252 cancer secretome (CCS). Using defined component gene sets for CCS and protein  
253 glycosylation<sup>[8]</sup>, we observed coordinated pan-cancer increase or decrease of CCS and wide-  
254 ranging increase in expression of genes associated with glycosylation in general (**Fig. 1C**). It  
255 is important to note that the glycosylation gene set contains subsets of annotated gene classes  
256 involved in secretome glycosylation (i.e., FUTs, solute carriers, positive/negative regulators of  
257 glycosylation in the Golgi). To add resolution to this analysis, we also evaluated two of the  
258 largest glycosylation subsets in the dataset, protein O- and N-linked glycosylation. Similarly,  
259 there is an extensive pan-cancer gene expression increase in both groups (**Fig. 1C**).  
260 Overlapping genes between CCS and glycosylation significantly correlated with resistance to  
261 both targeted the cytotoxic drugs, which may indicate that glycosylation of CCS components  
262 predicates drug sensitivity states.

263  
264 Regulation of the DNA methylome influences the N-glycomes of the cancer secretome and  
265 plasma proteome<sup>[36,37]</sup>. Curious as to how promoter methylation of FUTs can associate with  
266 drug sensitivity, we analyzed the methylation status at 1 kb upstream of the transcription start  
267 sites (TSS) of each FUT (since this TSS proximal region often are loci for dense hyper- and  
268 hypo-methylation in cancer cell lines)<sup>[38]</sup> and queried drug sensitivity data in the GDSC. The  
269 overall fraction of FUT methylated loci varied across tumor types (**Fig. 1D**). As predicted, we  
270 observed significant negative correlation between FUT mRNA expression and promoter

271 methylation. While the association between FUT methylation and drug sensitivity appears  
272 indiscriminately, FUT methylation profiles contradicted the correlation between FUT gene  
273 expression and resistance. In other words, cancer types exhibiting higher FUT methylation are  
274 more sensitive to targeted therapies with the exception of FUT1 and FUT6 (**Fig. 1D**),  
275 suggesting that cancer cells can inhibit fucosylation upon increased methylation of FUT  
276 promoter are more susceptible to therapy.

277  
278 Based on our analysis, we hypothesized that response and resistance to targeted therapies  
279 involve the systemic regulation of core fucosylation of CCS components (**Fig. 1E**). We  
280 performed a potpourri of biochemical assays to characterize fucosylation in multiple cancer  
281 cell lines, cell secretomes, and patient sera and tissues. To enrich protein samples for core  
282 fucosylation, we used a lectin-conjugated bead capture strategy, where *Aleuria aurantia* lectin  
283 (AAL) served as the carbohydrate probe for core fucose (**Fig. 1F**; see Methods). Remarkably,  
284 lectin blotting revealed a distinct signature of enriched core fucosylation of serum proteins  
285 between 30 and 60 kDa in lung cancer (LC) patients who received multiple cycles of  
286 osimertinib, a third-generation EGFR-tyrosine kinase inhibitor (TKI), compared to those of  
287 treatment-naïve patients (**Fig. 1F** and **Supplemental Fig. 4**). To quantitatively validate this  
288 result, we modified an N-glycan oxidation assay originally developed to assess the activity of  
289 PNGases in releasing N-linked oligosaccharide chains from glycosylated scaffolds. These  
290 cleaved N-glycans, upon deamination by water, possess hemiacetal moiety at their reducing  
291 terminus that is highly reactive to water soluble WST-1, a tetrazolium salt dye that serves as  
292 an oxidation agent for N-glycans. In this reaction, WST-1 is converted to a formazan,  
293 producing a colorimetric readout (see Methods)<sup>[39,40]</sup>. Due to its simplicity, we decided to adapt  
294 and optimize this assay to quantify the release of N-glycans from our samples using the  
295 glucoamidase PNGase F and glycosidases Endo S and F1.

296  
297 Following analysis of in-gel excised 30~60 kDa serum proteins, PNGase F-released N-glycans  
298 showed significantly higher levels in osimertinib-treated patients compared to treatment-naïve  
299 patients (**Fig. 1G**), while this apparent difference was considerably moderated when N-glycans  
300 were released by either Endo S or F1. While PNGase F can cleave all N-glycans, we assumed  
301 that the glycans released from our samples are mostly those that contain core fucose  
302 (cleavage at  $\alpha$ 1,6 site) because the subjected N-glycoproteins were captured using AAL (**Fig.**  
303 **1F**). Thus, the reduction in detected N-glycans released by Endo S or F1 reflects a specificity  
304 in cleaving different N-glycans (at  $\beta$ 1,4 site) other than those containing core fucose. Note that  
305 Endo S has a high specificity for removing N-glycans within the chitobiose core of native IgG  
306 while Endo F1 cleaves high mannose and some hybrid type N-glycans<sup>[41,42,43]</sup>. The results  
307 potentially suggest that the cancer TIS from patients contains an elevated pool of core  
308 fucosylated proteins <60 kDa.

309  
310 To couple these results with an overall measure of fucosylation in various perturbation models,  
311 we developed a sandwich enzyme-linked lectin assay with varying affinities for AAL-captured  
312 fucosylated proteins (ELLA; **Supplemental Fig. 5**; see Methods). Using *Ulex europaeus*  
313 agglutinin I (UEA1)-AAL sandwich ELLA, we measured core fucosylation of cell-derived  
314 secretomes (**Fig. 1H**). TIS derived from cancer cells treated with targeted inhibitors of EGFR,  
315 BRAF, and HER2 signaling unanimously led to an elevated secretome fucosylation (**Fig. 1I**).  
316 To extend these findings to models of therapy resistance, we generated 16 stable drug-  
317 resistant (DR) clones from various cancer types (lung adenocarcinoma, melanoma, and breast  
318 cancer) following stepwise evolution to appropriate targeted inhibitor pressures  
319 (**Supplemental Fig. 6**). All DR clone-derived secretomes showed increased fucosylation  
320 compared to secretomes derived from parental clones (**Fig. 1I**). Both 30~60 kDa TIS and  
321 secretome proteins from DR clones contained unanimously higher amounts of PNGase F-  
322 released N-glycans than those from DMSO or parental cell secretomes (**Fig. 1J**), while N-  
323 glycans released by either Endo S or F1 did not discriminate the amounts from all samples  
324 mirroring our observations from the patient sera.

325  
326 To substantiate this, we analyzed tissues from small cohorts of breast cancer (BC) and LC  
327 patients that received sequential multi-component therapy. Gene expression and enzyme  
328 activity analysis revealed that high expression of the fucose salvage pathway, FUT8, and  
329 SLC35C1 are strongly correlated with relapse (**Supplemental Fig. 7**, A and B). There was an  
330 immediate increase (16 h post-treatment) in Golgi-localized core fucosylation in drug-stressed  
331 LC and melanoma cells, and sustained activation in their respective DR clones  
332 (**Supplemental Fig. 7C** and **Fig. 1K**). We next profiled the expression of fucosylation genes  
333 in cancer cells with various oncogenic drivers upon apoptosis-inducing targeted therapy. While  
334 drug-induced expression changes varied between FUTs responsible for O- and N-linked  
335 glycosylation, there was a marked increase in FUT8 and SLC35C1 expression  
336 (**Supplemental Fig. 7D**), all of which are associated with apoptosis (3-day treatment;  
337 **Supplemental Fig. 7**, E and F). In DR clones, both expressions are also amplified except with  
338 a pronounced fucose salvage pathway (**Supplemental Fig. 7G**). Because FUT8 is highly  
339 expressed in both drug-stressed cells and DR clones, we probed its potential role in therapy  
340 resistance. We first analyzed independent, genome-wide RNAi screening data from the  
341 Cancer Dependency Map (DepMap) project<sup>[44]</sup>, which houses pan-cancer genetic vulnerability  
342 maps. FUT8 is not classified as an essential gene in both sensitive and resistant cancer cell  
343 lines (**Supplemental Fig. 8A**), despite marginally higher essentiality scores in TKI-resistant  
344 cells than sensitive cells (**Supplemental Fig. 8B**). Regardless, treatment with EGFR-TKI or  
345 BRAFi and selection for resistance both led to higher FUT8-dependent GDP-Fuc catalytic  
346 activity (**Supplemental Fig. 8C**). Non-lethal concentrations of nine kinase inhibitors induced  
347 FUT8 expression while near-lethal concentrations moderately mitigated this effect  
348 (**Supplemental Fig. 8D**). We then used RNAi to functionally dissect the role of FUT8 upon  
349 targeted therapy. FUT8-targeting siRNAs augmented drug-induced cell killing and subsequent  
350 rescue was observed upon transfection with FUT8 cDNA (**Supplemental Fig. 8E**), all  
351 independent of cell proliferation (**Supplemental Fig. 8F**). We obtained similar results with  
352 SLC35C1 (**Supplemental Fig. 8**, G to I). These results are consistent with the idea that direct  
353 or indirect mediators of core fucosylation confer resistance to targeted therapies.

354  
355 We next characterized fucosylation in cancer cell-derived secretomes to verify the differential  
356 secretome core fucosylation signature. Targeted kinase inhibition by EGFR-TKIs (gefitinib,  
357 erlotinib), HER2-TKI (lapatinib), or BRAFi (vemurafenib) induced fucosylation of secreted  
358 proteins <60 kDa (**Fig. 1L**). Similarly, secretomes derived from DR clones displayed an  
359 induced <60 kDa protein fucosylation (**Fig. 1M**). These results mimic the osimertinib-induced  
360 core fucosylation in LC patient sera. These are further accompanied by an overall increase in  
361 relapsed BC patient tissues and EGFR-TKI-treated LC patient sera (**Supplemental Fig. 9**, A  
362 and B). Well-known core fucosylated cancer biomarkers  $\alpha$ -fetoprotein (AFP) and  $\alpha$ -1-  
363 antitrypsin (A1AT), both >50 kDa, displayed systemic elevation in LC patient sera following  
364 osimertinib treatment and in secretomes of drug-stressed cells and DR clones, at least those  
365 expressing basal A1AT (**Supplemental Fig. 9**, C and D). Using molecular weight cut-off  
366 filtration, we confirmed that concentrated secreted proteins of >30 kDa from targeted inhibitor-  
367 treated cells, their respective DR clones, and EGFR-TKI-treated LC patients display  
368 distinctively enriched fucosylation and core  $\alpha$ -1,6-linkages, but less so in >100 kDa pooled  
369 proteins (**Fig. 1N** and **Supplemental Fig. 9E**). Following targeted therapy, pooled >30 kDa N-  
370 glycoproteins from sensitive cells displayed increased release of fucosylated N-glycans even  
371 at very low drug concentrations (from 0.001  $\mu$ M), particularly in hypersensitive cell lines  
372 (**Supplemental Fig. 9F**). These can be controlled by FUT8 or SLC35C1, at least shown *in*  
373 *vitro* (**Supplemental Fig. 9G**).

374  
375 Considering that some parental cell lines in our panel carry putative resistance drivers to  
376 specific TKIs, we sought to address two of the major 'off-target' resistance backgrounds in the  
377 context of targeted EGFR inhibition: MET amplification in H1993 cells and mutant KRAS  
378 activity in H358 cells. In H1993 cells and the derived GR clones, we evaluated the

379 consequences on secretome N-glycosylation upon MET inhibition using RNAi (**Supplemental**  
380 **Fig. 10A**). MET knockdown sensitized both parental cells and GR clones to gefitinib  
381 (**Supplemental Fig. 10B**) but did not affect the overall secretome glycosylation even after  
382 gefitinib treatment (**Supplemental Fig. 10C**). However, TIS from gefitinib-treated H1993 cells  
383 displayed higher fucosylation and N-glycan release upon MET RNAi (**Supplemental Fig. 10D**).  
384 In H358 cells and the derived ER clones, we assessed the effects of selective loss of KRAS  
385 oncogenic addiction or targeting of the KRAS GTP/GDP-binding pocket on secretome N-  
386 glycosylation. To achieve such, we used two strategies: (1) an RNAi known to functionally  
387 inhibit oncogenic KRAS mRNA in cells that harbor mutations at codon 12 (i.e., G12C)<sup>[45]</sup>  
388 (**Supplemental Fig. 11**, A to C), and (2) a KRAS agonist (KRA-533) known to promote  
389 accumulation of GTP-KRAS by prevention of cleavage from GTP into GDP<sup>[46]</sup> (**Supplemental**  
390 **Fig. 11D**). Both strategies led to sensitization of both parental cells and ER clones to erlotinib  
391 (**Supplemental Fig. 11**, E and F) but did not affect the overall secretome glycosylation even  
392 after erlotinib treatment (**Supplemental Fig. 11**, G and H). Mimicking the MET RNAi results in  
393 H1993 models, only TIS from erlotinib-treated H358 cells displayed higher fucosylation and  
394 N-glycan release upon mutant KRAS RNAi or KRA-533 treatment (**Supplemental Fig. 11**, I  
395 and J). While in both cases all DR clones were sensitized to the respective EGFR-TKIs, no  
396 overt changes were afforded in secretome fucosylation or N-glycan release. Our combined  
397 results support the idea that sensitizing parental cells by targeting putative resistance-  
398 promoting mechanisms produces a more reactive TIS with enriched fucosylation.

399  
400 Taken together, our results suggest that targeted therapies induce a prevalent pan-cancer  
401 secretome core fucosylation that is primarily regulated by the fucose salvage-SLC35C1-FUT8  
402 pathway and is enriched in the Golgi prior to secretion. This therapy-induced modification  
403 presumably is an evolvable mechanism towards establishing resistance.

#### 404 405 **Therapy resistance via drug-induced secretome fucosylation.**

406  
407 Limited tumor regression upon targeted therapy implicates that the microenvironment  
408 undergoes remodeling to critically sustain the remaining tumor population<sup>[7,47]</sup>. TIS, which  
409 consists of soluble mediators from this remodeled niche, predominantly promotes the survival  
410 and outgrowth of remnant tumor cells fostering subsequent disease relapse<sup>[7]</sup>. Considering  
411 that our data point to core fucosylation as a widespread PTM of the pan-cancer TIS, we  
412 proposed that de-N-glycosylation of the TIS prevents the outgrowth of residual DR tumor cells.  
413 To model a regressing tumor *in vitro*, we performed a multicolor homotypic ‘one-pot’ admixture  
414 assay by mixing a small percentage (1%) of red-tracker-labeled DR clones with a large pool  
415 (99%) of green-tracker-labeled sensitive cells in both 2D and 3D cultures. We then subjected  
416 these admixtures to targeted therapy, exogenously added PNGase F to de-N-glycosylate  
417 secretome proteins, and tracked the rebound of DR clones and regression of the sensitive cell  
418 pool (**Fig. 2A**). Following the formation of a 3D tumor spheroid, the population of the admixed  
419 gefitinib-resistant (GR) clone gradually expanded (observable after day 1 and steady from day  
420 5), while sensitive cell population significantly decreased upon targeted therapy (**Fig. 2B** and  
421 **Supplemental Movie**, 1 and 2; representative PC9 admixture in **Supplemental Movie 3**).  
422 Addition of PNGase F to these admixture secretomes led to a striking protein de-N-  
423 glycosylation in culture (**Fig. 2**, C and D). Therefore, therapy-induced regression of mostly  
424 sensitive cells and population expansion of admixed minority GR and erlotinib-resistant (ER)  
425 clones are tightly linked with increased secretome core fucosylation (**Fig. 2E**).

426  
427 Considering an abundant core fucosylation in all biologically active conditioned media (CM)  
428 occur before apoptosis or senescence and is enriched in the soluble secretome rather than  
429 apoptotic bodies, it is likely that cell-derived TIS and its N-glycosylation are actively produced  
430 as a result of targeted oncogene inhibition (**Supplemental Fig. 12**). In both 3D and 2D  
431 admixture assays, secretome de-N-glycosylation blocked the growth acceleration of the DR  
432 clone promoted by TIS in various cancer backgrounds and targeted therapy settings (**Fig. 2**,



433 F and G; and **Supplemental Fig. 13A**), delayed the S-phase cycle of residual cell populations,  
434 and promoted apoptosis (**Fig. 2G** and **Supplemental Fig. 13**, B and C). Consistently, in a CM  
435 co-culture assay, TIS stimulated the proliferation of low-density seeded DR clones while  
436 exposure to de-N-glycosylated TIS limited their outgrowth (**Supplemental Fig. 13D**). Of note,  
437 de-N-glycosylation in fresh media or DMSO CM did not affect DR clone proliferation  
438 (**Supplemental Fig. 13D**). At day 5, depletion of FUT8 or SLC35C1 efficiently blocked the  
439 expansion of DR clone population in a regressed cell admixture (**Fig. 2H** and **Supplemental**  
440 **Fig. 13E**), suggesting that the similar effect afforded by PNGase F is via protein de-N-  
441 glycosylation. In such a circumstance, we observed depletion of fucosylation (in both apoptotic  
442 bodies and soluble secretome) and intracellular kinase phospho-proteome (**Fig. 2**, I and J).  
443 We corroborated these in a CM co-culture assay (**Fig. 2K**), wherein de-N-glycosylated TIS  
444 prevented DR clones to form colonies and decreased kinase phosphorylation activity of EGFR,  
445 MET, and ErbB3, at least in GR and ER clones, respectively (**Fig. 2**, L and M). De-N-  
446 glycosylation by PNGase F in CM co-cultures (fresh media or CM from same cell/clone source)  
447 did not significantly influence the drug sensitivity of both sensitive cells and DR clones  
448 (**Supplemental Fig. 14A**), except in sensitive cells cultured in their own de-N-glycosylated  
449 TIS, where there is a widespread drug sensitization (**Supplemental Fig. 14A**). These point to  
450 the idea that fucosylation of the TIS from drug-treated sensitive cells is critical to its survival-  
451 enhancing effects not only on DR clones but also in drug-sensitive cells. Across all cell lines  
452 and DR clones, PNGase F in-culture for up to 5 days did not affect cell proliferation  
453 (**Supplemental Fig. 14B**). We assumed that PNGase F in our cell admixture assays not only  
454 de-N-glycosylates secreted scaffolds but should also affect cell surface N-glycans. We  
455 inspected the potential changes on N-glycosylation of cell membrane proteins in our  
456 admixtures by pooling subcellular fractions (admixture set-up as in **Fig. 2A**). At day 5, we only  
457 observed a significant increase in fucosylation from TIS and ER/Golgi fractions, not from cell  
458 membrane fractions, of EGFR-TKI-treated H1993 and PC9 admixtures (**Supplemental Fig.**  
459 **15**, A and B). In addition, there were no changes in the <60 kDa fucosylation signature in cell  
460 membrane fractions of the admixtures, unlike the significant increase in ER/Golgi fraction  
461 (**Supplemental Fig. 15C**). Regardless, PNGase F effectively de-N-glycosylated cell  
462 membrane proteins in-culture of both EGFR-TKI-treated H1993 and PC9 admixtures  
463 (**Supplemental Fig. 15**, D and E). Although we cannot completely rule out alternative  
464 possibilities, these results favor the idea that core fucosylation of the TIS, and not of membrane  
465 proteins, promotes the DR clone population expansion observed in our cell admixture  
466 experiments.

467  
468 Next, we established a 'sequentially layered' 3D spheroid *in vitro* co-culture and monitored the  
469 growth of red fluorescent protein (RFP)-expressing DR clones (H1993-GR, PC9-ER) in the  
470 absence or presence of sensitive cells treated with kinase inhibitors or vehicle (**Supplemental**  
471 **Fig. 16A**). Resembling our initial findings, co-culture with EGFR-TKI (gefitinib or erlotinib)-  
472 treated sensitive cells significantly promoted the growth of DR clones while the addition of  
473 PNGase F in the culture pronouncedly led to their growth retardation (**Supplemental Fig. 16**,  
474 B and C). In these 3D admixtures at day 5, TIS de-N-glycosylation triggered the senescence-  
475 associated secretory phenotype (SASP) and impeded the gene expression of factors  
476 previously described to promote resistant cell outgrowth in a regressing TME<sup>[7]</sup> (**Fig. 1N**). It  
477 appears that the response of DR clones in these admixtures upon TIS de-N-glycosylation is  
478 independent of fucosylation gene activity since there was no marked changes in expression  
479 (**Supplemental Fig. 16D**). Notably, long-term passaging and culture of DR clones in de-N-  
480 glycosylated TIS initiated a senescence response shown by strong senescence-associated  $\beta$ -  
481 galactosidase (SA- $\beta$ -gal) activity, SASP activation, and arrested growth (**Supplemental Fig.**  
482 **17**), elucidating the inhibited proliferative capacity of these clones in cell admixtures upon TIS  
483 de-N-glycosylation. These results demonstrate that the rebound of DR clone population in a  
484 model of tumor regression is dependent on fucosylated scaffolds of the TIS.

485  
486 **PON1 fucosylation is a critical feature of therapy-induced cancer secretomes.**

487

488 To identify relevant components of the TIS- and DR clone-specific N-glycomes, we performed  
489 label-free in-gel proteomics using AAL-captured 30~70 kDa secretome proteins derived from  
490 H1993 cells treated with or without gefitinib or the GR clone (**Fig. 3A**). Our analysis retrieved  
491 a fairly reproducible amount of peptide sequences per sample, which we used for downstream  
492 target identification (**Supplemental Fig. 18A**). Base peak chromatogram revealed differential  
493 mass ranges in all samples, with relatively higher overlapping similarity between gefitinib-  
494 treated cells and GR clone (**Supplemental Fig. 18B**). Because of the preliminary culture (i.e.,  
495 2% serum) and stress condition (drug treatment) requirements to produce TIS and semi-  
496 quantitative nature of our screen, many proteins identified by this method are expected to be  
497 'contaminants' derived from non-secreted apoptotic proteins, serum proteins (trypsin, albumin,  
498 keratin), uncharacterized proteins, immunoglobulins, and proteins below or above the range  
499 of excised in-gel sections (<30 and >70 kDa). As expected, we derived >60% 'contaminant'  
500 protein coverage. We filtered these out and retained proteins that are only classified as  
501 'secretory' or 'extracellular' based on the annotation criteria by UniProt (i.e., possession of N-  
502 terminal signal sequence), yielding a total of 57 unique, secretory-predicted proteins across  
503 the three conditions. Gene ontology (GO) analysis showed significant enrichment of biological  
504 processes (BPs) implicated in stress response, secretory pathway, and protein maturation in  
505 the ER/Golgi (**Fig. 3B**). Interestingly, BPs related to the metabolic regulation of oxidative stress  
506 were significantly overrepresented. Following selection of overlapping fucosylated secretome  
507 proteins between gefitinib-treated H1993 cells and GR clone, we identified 11 top hits using  
508 two different quantitative approaches [label-free quantification (LFQ) and intensity-based  
509 absolute quantification (iBAQ)]. Many of these hits are serum proteins described to have  
510 aberrant N-glycosylation during cancer progression such as AFP<sup>[24]</sup> and the protein disulfide  
511 isomerase PDIA3<sup>[48]</sup>.

512

513 Among the identified fucosylated proteins, we focused on PON1, an antioxidant enzyme, as  
514 its biological function matched the overrepresented BPs (**Fig. 3C** and **Supplemental Fig.**  
515 **18C**). We previously identified PON1 to be systemically fucosylated in sera of late-stage  
516 metastatic small cell LC (SCLC) patients in an integrated glycoproteomics screen<sup>[49]</sup>. In  
517 gefitinib-treated H1993 cell secretome, we confirmed strong fucosylation of PON1, which  
518 appeared to have two isoforms: one with an apparent molecular mass of ~55 kDa while the  
519 other is ~45 kDa (**Fig. 3D**). Intracellularly, PON1 has both nuclear and cytoplasmic isoforms  
520 where a ~40 kDa cytoplasmic isoform is selectively enriched in LC patient tissues and cell  
521 lines<sup>[50]</sup>. To quantitatively validate secretome PON1 fucosylation in drug-stressed cancer cells  
522 and DR clones, we employed PON1 fucosylation-specific hybrid lectin ELISA (HLE; **Fig. 3E**).  
523 Despite different cell lineages, different oncogenic drivers, and different drugs, we found a  
524 widespread elevation of fucosylated secretome PON1 levels in multiple cancer cells upon  
525 targeted therapy (**Fig. 3F**). Similarly, PON1 fucosylation is enriched in secretomes derived  
526 from DR clones (at least those that have detectable PON1 gene expression) and is strikingly  
527 elevated in LC patient sera upon osimertinib treatment (**Fig. 3**, G and H).

528

529 Using receiver operating characteristic (ROC) curves, we investigated whether fucosylated  
530 PON1 can discriminate between non-treated and osimertinib-treated LC patient sera. PON1  
531 fucosylation discriminated against the conditions with high sensitivity and specificity with  
532 associated area under the curve (AUC) of 0.901, based on HLE measurements (**Fig. 3I**, left).  
533 We previously reported that systemic serum PON1 is diminished in LC patients where  
534 fucosylated serum PON1 is increased (i.e., extensive disease). We hypothesize that this  
535 inverse relationship reflects an N-linked glycosylation-dependent control of PON1 activity.  
536 Supporting this idea, serum paraoxonase and arylesterase activities of PON1 were  
537 significantly differentiated between non-treated and osimertinib-treated LC patient sera (**Fig.**  
538 **3I**, right and **Supplemental Fig. 19A**). Also, both of these enzyme activities significantly  
539 discriminated the treatment group with AUCs ranging from 0.76–0.89. In LC patient tissues,  
540 PON1 fucosylation is associated with relapse and discriminated it from non-relapsed LC with

541 an AUC of 0.77 (**Supplemental Fig. 19B**). Next, we characterized intracellular PON1  
542 fucosylation in DR clones. PON1 is primarily localized in the Golgi and has active fucosylation  
543 in the Golgi/ER fractions of GR and vemurafenib-resistant (VR) clones (**Fig. 3**, J and K).  
544 SLC35C1 RNAi significantly reduced Golgi-enriched PON1 fucosylation and promiscuously  
545 induced overall fucosylation in the nucleus of both DR clones (**Fig. 3**, L and M), indicating a  
546 functional defect in the transport of GDP-Fuc along the secretory pathway.

547  
548 To identify direct regulators of PON1 fucosylation, we examined CCLE-annotated PON1  
549 protein interactors based on co-expressing genes. We first clustered hits based on  
550 Spearman's correlation and identified the cellular localization of each protein (**Fig. 3N**). Among  
551 the top 20 proteins, only PON3 and VWA7 showed co-localization with PON1 in the secretory  
552 pathway. We were intrigued by PON3, also a serum paraoxonase known to both preferentially  
553 interact and share numerous conserved PTM (i.e., N-glycosylation) sites with PON1<sup>[51]</sup>. In both  
554 GR and VR clones, there is an active co-localization between PON1 and PON3 (**Fig. 3O**).  
555 While PON1 expression did not discriminate non-relapsed and relapsed BC patient tissues,  
556 high PON3 expression correlated well with relapse (**Supplemental Fig. 19C**). In addition,  
557 PON3 expression is increased in various drug-stressed cells and DR clones (**Supplemental**  
558 **Fig. 19D**). In Golgi/ER of H1993-GR, both PON3 and SLC35C1 RNAi, but not PON1 RNAi,  
559 inhibited PON1 fucosylation (**Fig. 3P**), demonstrating that PON3 directs PON1 fucosylation  
560 prior to secretion. Moreover, only PON1 RNAi, not PON3 or SLC35C1 RNAi, impeded  
561 Golgi/ER-specific paraoxonase activity (**Fig. 3P**), reflecting known differences between the  
562 two PONs in hydrolyzing paraoxon<sup>[52]</sup>. In a cross-linking GDP-Fuc activity assay, we showed  
563 that PON3 or SLC35C1 RNAi can ablate FUT8-directed transfer of fucose moiety from GDP-  
564 Fuc to N-glycan GlcNAc residue of PON1 (**Fig. 3Q**), implying direct functional regulation of  
565 PON1 fucosylation by PON3. Confirming the depletion of secretome PON1 fucosylation by a  
566 glycosidase, we showed that in the secretome, PON1 is de-N-glycosylated upon exogenous  
567 addition of PNGase F onto cultures of sensitive cells and DR clones but without marked  
568 changes in GDP-Fuc activity on PON1 in Golgi/ER or PON1 secretion in sensitive cells, DR  
569 clones, and cells engineered to overexpress PON1 (**Supplemental Fig. 19**, E to G). All these  
570 suggest that core fucosylated PON1 is a major component of the constitutive N-glycome of  
571 the cancer TIS and a signature of targeted therapy resistance.

### 572 573 **Core fucosylation enhances PON1 stability and prompts PON1 for secretion in therapy-** 574 **resistant cancer cells.**

575  
576 Given our prior knowledge on how systemic serum PON1 activity is diminished in LC patients  
577 and mouse model profiled with high serum PON1 fucosylation<sup>[49,50]</sup>, we hypothesized that  
578 therapy-induced protein glycosylation rewires the maturation steps of PON1 in the secretory  
579 pathway (**Fig. 4A**). PON1 has 23 predicted N-glycosylation sites with four Asn-X-Ser/Thr  
580 sequons—consensus amino acid sequences that determine core N-glycosylation efficiency—all  
581 scored above the 'high potential' threshold (**Fig. 4B**). PON1 is predicted to be mostly folded  
582 and has a negative net electrical charge (-16 at pH 7). All four sequons of PON1 (N227, N253,  
583 N270, N324) and their immediate vicinity have either neutral (0) or negative (ranging from -  
584 0.4 to -0.2) net charge (**Fig. 4B**). Among the four sequons, N324(GT) and N270(IS) are well  
585 conserved throughout species while N253(WT) is uniquely conserved in mammals (**Fig. 4C**).  
586 Both N253(WT) and N324(GT) sequons are located in the outer region of PON1's  $\beta$ -propeller  
587 structure while the other sequons are found in the innermost tunnel structure near the calcium-  
588 binding sites (**Fig. 4D**). Whether or not these indicate preference for aberrant glycosylation  
589 remain an open question. Regardless, the net charge, polarity, and X amino acid (in Asn-X-  
590 Ser/Thr) of sequons and their vicinity can generate preferable environments for aberrant  
591 protein N-glycosylation<sup>[53,54]</sup>.

592  
593 To structurally map the bound N-glycans on PON1, we analyzed our previous tandem mass  
594 spectrometry (MS/MS) data<sup>[49]</sup>. We determined six aberrantly fucosylated glycans released

595 from immunoprecipitated PON1, where GlcNAc<sub>2</sub>Man<sub>3</sub> + HexNAc<sub>2</sub>Fuc<sub>1</sub> putative glycan  
596 structures are commonly present (**Fig. 4E**). Two of the most abundant glycans (peaks 1 and  
597 2) were identified to have high FUT8 substrate specificity, while the rest (peaks 3 to 6) has  
598 either low specificity or not yet identified (**Fig. 4E**, bottom)<sup>[55,56]</sup>. To probe PON1 fucosylation  
599 in a site-specific manner, we introduced single-point mutation in two PON1 sequons [N253(WT)  
600 and N324(GT)]—predicted to display loss of N-glycosylation along with protein destabilization  
601 upon Asp→Gly mutation—and transfected the full-length wild-type (FL) or mutant constructs  
602 into sensitive cells, DR clones, and PON1-edited cells (**Fig. 4F**). Both PON1 mutants  
603 selectively reduced PON1 core fucosylation and prevented efficient GDP-Fuc transfer (**Fig. 4**,  
604 G and H). Note that N253G displayed more robust effects than N324G. These mutants only  
605 had subtle effects on overall secretome N-glycosylation and did not alter gene expression of  
606 PON1, PON3, and fucose salvage factors FUK, GMD, SLC35C1, and FUT8 (**Supplemental**  
607 **Fig. 19**, H and I). FL or PON1 mutants did not have significant effects on the response of  
608 sensitive cells to EGFR-TKIs while both N253G and N324G mutants, not FL, sensitized both  
609 GR and ER clones to EGFR inhibition (**Supplemental Fig. 19J**), suggesting that PON1  
610 fucosylation is a resistance selected mechanism.

611  
612 To validate the predicted effects of N253G and N324G mutations on PON1 stability, we  
613 assayed PON1 folding and synthesis upon protein cleavage by trypsin or de novo protein  
614 synthesis inhibition by cycloheximide (CHX) treatment. Immunoblotting of whole GR clone  
615 lysates revealed that N253G remarkably promoted PON1 misfolding by completely sensitizing  
616 PON1 to cleavage by trypsin. N324G induced a noticeable PON1 cleavage only at a higher  
617 trypsin concentration (**Fig. 4I**). In the Golgi/ER of GR clone, similar effects were also afforded  
618 on PON1 when tested using ELISA and on protein glycosylation after PON1  
619 immunoprecipitation (**Fig. 4J** and **Supplemental Fig. 19K**). In Golgi/ER of A549 cells, where  
620 there is basal PON1 expression, N253G did not alter PON1's sensitivity to trypsin. Conversely,  
621 the same mutation rendered PON1 from PON1-overexpressing cells sensitized to trypsin  
622 (**Supplemental Fig. 19L**). Furthermore, EGFR-TKI resistance or PON1 overexpression  
623 delayed the degradation of nascent polypeptides upon CHX treatment (**Supplemental Fig.**  
624 **19M**). In GR clone, N253G had no significant effect on overall protein synthesis (**Fig. 4K**). In  
625 addition, EGFR-TKI resistance delayed the degradation of total fucosylated proteins and  
626 Golgi-specific PON1-immunoprecipitated glycoproteins (**Supplemental Fig. 19**, N and O). In  
627 GR clone, N253G accelerated the degradation of the lower kDa isoform of PON1, presumably  
628 its fucosylated form (**Fig. 4L**). More importantly, N253G significantly ablated PON1 secretion  
629 while N324G displayed a modest effect (**Fig. 4M**). Unexpectedly, N253G inhibited the  
630 intracellular arylesterase, but not paraoxonase, activity in GR clone (**Supplemental Fig. 19P**).  
631 This is consistent with our hypothesis that N-glycosylation of PON1 governs its enzyme activity.  
632 Taken together, our data suggest that core fucosylation promotes PON1 stability prior to  
633 secretion in DR clones and PON1-overexpressing cells. This offers an answer to our long-  
634 standing question of how fucosylation affords a more stable, degradation-resistant PON1 state  
635 in the secretion, which seems to involve a rewired enzyme activity.

636  
637 As an initial investigation of the functional consequences of PON1-specific core fucosylation  
638 inhibition on TIS-driven therapy resistance, we performed similar PON3 RNAi and PON1 site-  
639 directed mutagenesis experiments in sensitive cells followed by 2D cell admixture assays.  
640 Inhibition of PON1 core fucosylation via PON3 silencing or PON1 N253G mutation in sensitive  
641 cells significantly prevented the population expansion of DR clones in regressed cell  
642 admixtures at day 5 (**Supplemental Fig. 20**), consistently supporting our hypothesis that  
643 PON1 core fucosylation is a critical and functional component of the cancer TIS.

644  
645 **Blockade of secretome core fucosylation confines therapy resistance via UPR effectors**  
646 **and a pro-inflammatory niche.**

647  
648 To generally address the mechanism by which TIS de-N-glycosylation prevents rebound of

649 DR clones in a regressing tumor model, we preliminarily mapped changes in 45 intracellular  
650 signaling pathways using a dual-luciferase activity reporter array. In a retrieved fraction of GR  
651 clone upon TIS de-N-glycosylation in 2D admixture, ER stress (ATF6), amino acid response  
652 (AAR element; ATF2, ATF3, ATF4), androgen receptor (AR) pathways, and E2F transcription  
653 were distinctively up-regulated, while stem cell factors (SOX2, NANOG, OCT4), interferon-  
654 stimulated response (ISR element; STAT1, STAT2), STAT3, and hypoxia (HIF) signaling were  
655 selectively repressed (**Fig. 5A**). We validated this expression signature in 3D admixtures of  
656 DR clone (H1993-GR or PC9-ER) and sensitive cells (**Fig. 5B** and **Supplemental Fig. 21A**).  
657 In these admixtures, PON1-N253G transfection in sensitive cells phenocopied the effects of  
658 TIS de-N-glycosylation on intracellular signaling, senescence, regressing TME cues, kinase  
659 phospho-proteome, and growth of GR and ER clones (**Fig. 5C** and **Supplemental Fig. 21, B**  
660 to G). These data point to a cascade of ER stress and UPR-regulated translational  
661 reprogramming events as mediators in blocking the growth of DR clones upon TIS de-N-  
662 glycosylation or fucosylated PON1 inhibition.

663  
664 To probe these processes, we focused on ATF6, an ER-localized UPR-specific stress  
665 sensor<sup>[57]</sup>. In a CM co-culture, both TIS de-N-glycosylation and fucosylated PON1 inhibition  
666 actively induced Golgi/ER-localized ATF6 with enriched co-localization with fucosylated  
667 scaffold residues in DR clones (**Fig. 5D** and **Supplemental Fig. 21H**), which probably  
668 implicates ER stress-induced translocation/sorting of ATF6 from ER to Golgi. Next, we asked  
669 whether these stress-induced responses are orchestrated with oxidative stress given the  
670 phenotypic response of cell admixtures to inhibition of TIS-specific PON1 fucosylation via  
671 PON1-N253G mutation. Indeed, de-N-glycosylating TIS and inhibiting fucosylated PON1 in  
672 regressing cell admixtures markedly stimulated the production of reactive oxygen and nitrogen  
673 species (ROS/RNS), a hallmark of redox imbalance (**Fig. 5E** and **Supplemental Fig. 21I**). In  
674 DR clones co-cultured in modified TIS with scarce PON1 fucosylation, silencing ATF6  
675 prohibited the generation of intracellular ROS/RNS (**Fig. 5F** and **Supplemental Fig. 21J**). In  
676 gefitinib-treated 3D cell admixtures, PON1-N253G-bearing sensitive cells restrained the  
677 growth of GR clone while ATF6 RNAi reverted this effect (**Fig. 5, G and H**). PON1-N253G  
678 promoted a pro-inflammatory environment in the same cell admixtures with increased levels  
679 of IL-6, TNF- $\alpha$ , and GM-CSF cytokines in the secretome while ATF6 RNAi antagonized this  
680 induced cytokine signature (**Fig. 5I**).

681  
682 To assess in more detail how perturbations in PON1 fucosylation influence the growth of DR  
683 clones, we established cell models to differentially modify secretome PON1 fucosylation.  
684 When overexpressed at a high degree (>700 fold) in cells without detectable PON1 (H460 and  
685 H1993), we observed an active PON1 fucosylation in the secretion. Stably knocking-out PON1  
686 in wild-type PON1-expressing cells (A549) did not alter PON1 fucosylation intracellularly or in  
687 the secretion while stably knocking-out SLC35C1 in PON1-overexpressing cells led to  
688 suppression. Additionally, transfection of PON1-N253G construct or exogenous PNGase F  
689 treatment in PON1-overexpressing cells mitigated secretome PON1 fucosylation (summary in  
690 **Fig. 5J**). Accordingly, modified cells with de-N-glycosylated secretome PON1 have increased  
691 ROS/RNS and a more pro-inflammatory secretome (**Fig. 5, K and L**). More importantly, PON1  
692 fucosylation-enriched TIS amplified the growth of GR and ER clones while cells with de-N-  
693 glycosylated PON1 prevented this growth coupled with increased intracellular caspase  
694 activities (**Fig. 5, M and N**). Furthermore, UPR target genes were consistently up-regulated in  
695 DR clones co-cultured with TIS or PON1-overexpressing cell secretomes with de-N-  
696 glycosylated PON1 (**Supplemental Fig. 21K**). In the same DR clones, restricted growth is  
697 associated with nuclear translocation of XBP1 (**Supplemental Fig. 21L**), indicating ATF6-  
698 induced transcription factor activation.

699  
700 **Transcriptomics reveals resistance-associated genes mediated by secretome PON1**  
701 **core fucosylation.**

702

703 To identify resistance-relevant genes that modulate responses to changes in secretome  
704 fucosylation, we performed a transcriptome-wide analysis of gene expression in DR clones at  
705 48 h after co-culture with altered secretome conditions *in vitro* (**Fig. 6A**). The similarity in gene  
706 expression profiles was observed in replicate samples and among conditions that represent  
707 control (H1993 and H460), positive fucosylation regulation (gefitinib-treated H1993 and H460-  
708 PON1), or negative PON1 fucosylation regulation (PNGase-treated and PON1-N253G-  
709 transfected H460-PON1) (**Supplemental Fig. 22A**). Secretome de-N-glycosylation and PON1  
710 fucosylation inhibition led to 433 altered gene expression, and pathway analysis revealed that  
711 overlapped genes were enriched for negative regulators of the cell cycle, and regulators of  
712 transcription and metabolism (**Fig. 6B**). The same conditions generated a more down-  
713 regulated DR clone transcriptome associated with regulation of receptor signaling pathways,  
714 cell communication, and cell proliferation, among others (**Fig. 6B**). Enriched secretome  
715 fucosylation led to fewer differentially expressed genes that are mostly involved in cellular  
716 metabolic reactions (**Supplemental Fig. 22B**). Only one overlapping altered gene was  
717 detected between the two conditions promoting secretome fucosylation (gefitinib treatment  
718 and PON1 overexpression; **Supplemental Fig. 22C**). To identify molecular drivers of the DR  
719 clone's response to the suppression of secretome PON1 fucosylation, we integrated the data  
720 of differentially expressed genes in both PNGase F treatment and PON1-N253G transfection  
721 conditions. Secretome de-N-glycosylation led to 135 down- and 65 up-regulated genes, and  
722 secretome PON1 fucosylation inhibition resulted in 150 down- and 83 up-regulated genes, all  
723 with statistically significant *p* values (**Fig. 6C**). 21 genes were up-regulated while 90 genes  
724 were down-regulated in both conditions (**Fig. 6D**). This analysis highlighted C19orf25, RPS27L,  
725 CLDN2, PAQR3, and SOX4 as putative blockers; while THBS1, F3, TAGLN, ANKRD1, and  
726 DKK1 as positive regulators of secretome PON1 fucosylation-mediated DR clone outgrowth  
727 (**Fig. 6E**). To elucidate the implication of these genes in targeted therapy resistance, we  
728 analyzed genome-scale loss-of-function screening data from the Cancer DepMap project. We  
729 observed variable pan-cancer dependency signatures among the top 10 up- and down-  
730 regulated hits from our initial screen and found that only C19orf25 is denoted as 'commonly  
731 essential' in a pan-cancer ranking scheme. Regardless, many of these genes display high  
732 dependency scores in a fraction of cancer cell lines (**Fig. 6F**). We then examined whether  
733 these dependency profiles correlate with drug sensitivity. Indeed, many of these gene  
734 dependencies strongly correlate with either a drug-sensitive or a drug-resistant state to  
735 inhibitors of EGFR or RTK signaling, albeit varied *p* values mainly due to different cancer  
736 lineages screened. Intriguingly, top overlapping up-regulated genes upon secretome de-N-  
737 glycosylation and PON1 fucosylation inhibition mostly correlate with a drug-sensitive state,  
738 while the down-regulated genes are more associated with resistance to EGFR-TKIs or RTK  
739 inhibitors (**Fig. 6F**). Validating these results, their pan-cancer expression profiles also  
740 correlated with broadly similar drug sensitivity signatures (**Supplemental Fig. 23A**). In large  
741 LC patient cohorts, high expression of two up-regulated gene hits, RPS27L and C19orf25, are  
742 correlated with increased first progression survival or RFS, while high expression of two down-  
743 regulated gene hits, DKK1 and THBS1, are associated with poor survival outcomes after  
744 therapy (**Fig. 6G** and **Supplemental Fig. 23B**). Collectively, our data indicate that modulatory  
745 genes controlling DR clone response to inhibited secretome PON1 fucosylation are  
746 functionally associated with drug sensitivity to targeted therapies and are potential therapeutic  
747 targets to limit DR clone outgrowth.

#### 748 749 **Core secretome fucosylation is engaged during metastasis and influences the** 750 **dissemination of therapy-resistant cancer cells.**

751  
752 Systemic aberration in fucosylation is implicated in multiple stages of metastasis<sup>[27,29,58]</sup>.  
753 Although it will be interesting to dissect in detail how TIS-specific core fucosylation is required  
754 in the dissemination and metastasis of DR clones, we limited our analysis with phenotypic  
755 correlations using mouse models, cell lines, and patient data in the context of therapy  
756 resistance and relapse to generate a conduit of preliminary data. First, we established an in

757 vivo orthotopic model of lung metastasis using Lewis lung carcinoma (LLC) cells in C57BL/6  
758 background mice and concurrently made xenograft tumors derived from the same cells for  
759 comparative analysis (**Supplemental Fig. 24A**). The majority of fucosylation gene expression  
760 is up-regulated in both LLC metastasized and xenograft tumors. However, we observed a  
761 distinct glycosylation signature (i.e., high FUT8 and low POFUT expression) in the metastatic  
762 lung nodules (**Supplemental Fig. 24B**). Note that several of these FUTs exert divergent  
763 effects during metastasis of different tumor cell types<sup>[29]</sup>. In melanoma, indirect transcriptional  
764 repression of FUK and reduced FUT1 expression promote distant metastasis and seeding  
765 capacities<sup>[59,60]</sup>. These effects could also be extended to other malignancies such as  
766 pancreatic cancer and oral squamous cell (OSCC) and hepatocellular (HCC) carcinomas  
767 where tumors require reduced  $\alpha(1,2)$  fucosylation for progression<sup>[29]</sup>. In our lung metastasis  
768 model, FUT1 and FUT2 expression—known mediators of  $\alpha(1,2)$  fucosylation—were down-  
769 regulated compared to both normal and xenograft tumor tissues (**Supplemental Fig. 24B**).  
770 Ex vivo biochemical analysis of both tissues and sera revealed aberrant core fucosylation  
771 immediately preceding large metastasis (in micrometastasized tumors) compared to normal  
772 tissue or xenograft tumors (**Supplemental Fig. 24**, C and D).

773  
774 Whereas the contribution of TIS to the metastatic outgrowth of remnant DR clones in  
775 regressing tumors has been previously investigated, almost nothing is known about the role  
776 of TIS fucosylation in mediating such process. To address this *in vitro*, we set up transwell  
777 invasion and monolayer gap-closing assays and used PNGase F to de-N-glycosylate cell TIS  
778 or LLC mouse serum (schematic in **Supplemental Fig. 24E**). Indeed, TIS or serum from  
779 mouse burdened with lung metastasis increased the invasion of both GR and ER clones.  
780 Notably, there was a marked reduction in their invasion upon protein de-N-glycosylation  
781 (**Supplemental Fig. 24E**). In a gene expression analysis of recovered invasive DR clones in  
782 the same co-culture conditions, we observed suppression of mesenchymal and cancer stem  
783 cell (CSC) phenotypes (**Supplemental Fig. 24F**). In addition, the same protein de-N-  
784 glycosylation conditions inhibited gap-closing migration of DR clones (**Supplemental Fig.**  
785 **24G**). Substantiating these findings, high degree fucosylation is associated with BC relapse,  
786 lymph node metastasis, and HER2 expression in a small cohort of patients (**Supplemental**  
787 **Fig. 24H**). Furthermore, FUT8 expression significantly correlated with CSC expression in BC  
788 tissues from the same patient cohort (**Supplemental Fig. 24I**). Note that higher expressions  
789 were observed in relapsed tumors. In a much larger patient cohort (METABRIC dataset),  
790 amplification of fucosylation genes FUK, SLC35C1, and FUT8 are significantly associated with  
791 CSC gene expression (**Supplemental Fig. 24J**).

792  
793 Lastly, we aimed to uncover a potential regulatory role for PON1 fucosylation in metastasis.  
794 We engineered LLC cells to overexpress PON1 and found a striking increase in secretome  
795 PON1 fucosylation (**Supplemental Fig. 24**, K and L). Using these PON1-modified cells (LLC-  
796 PON1) along with control cells derived from the same parent cell line (LLC-CC), we  
797 interrogated their metastasis to the lung (**Supplemental Fig. 24M**). LLC-PON1 cells displayed  
798 higher metastatic propensity, tissue and serum core fucosylation and serum PON1  
799 fucosylation than LLC-CC cells in vivo (**Supplemental Fig. 24**, N to R). In metastasized lung  
800 nodules, LLC-PON1 displayed CSC and N-glycosylation-specific gene expression signatures  
801 (**Supplemental Fig. 24S**). Although further mechanistic work will be needed, our data suggest  
802 that metastasis is associated with an aberrant N-glycome—with elevated PON1 fucosylation  
803 as a critical component—that serves as a niche for developing therapy resistance.

## 804 805 **DISCUSSION**

806  
807 Here we identify a distinct N-glycome signature of the pan-cancer TIS. Using complementing  
808 fucosylation enrichment and detection approaches, we show that an induced secretome <60  
809 kDa protein fucosylation is systemically aberrant in cancer cells and patients upon targeted  
810 therapy. This modification appeared to be selected during resistance evolution as cell-derived

811 DR clones and relapsed cancer patients display the same secretome aberration.  
812 Counterintuitively, TIS marks both response and resistance to targeted therapy<sup>[7,47]</sup>.  
813 Subsequent regression of tumors and their TME in response to targeted therapy lead to the  
814 release of TIS that feeds the outgrowth of minority DR clones and survival of other cellular  
815 components (i.e., stromal cells) of the targeted microenvironment<sup>[7,47]</sup>. We reveal that core  
816 fucosylation of the TIS augments this effect. De-N-glycosylating the TIS by a glycosidase  
817 suppressed critical resistance-mediating survival cues and promoted a senescent state in  
818 regressing cell admixtures. Thereby glycans bound to N-glycosylated scaffolds of the TIS, not  
819 the released N-glycans per se, are required to establish a resistance-conferring niche.  
820 Mechanistically, directly blocking the transport of GDP-Fuc into Golgi or transfer of fucose onto  
821 proteins prevent the population rebound of remnant DR clones, encouraging a more drug-  
822 responsive cell population.

823  
824 To date, there are 11 FUTs and two POFUTs known to catalyze fucose transfer from donor  
825 GDP-Fuc to various acceptor scaffolds such as glycoproteins and glycolipids, following Golgi-  
826 specific transport of GDP-Fuc by SLC35C1<sup>[27,28,29]</sup>. These enzymes can compete in a mutually  
827 exclusive fashion to synthesize glycans in the Golgi and are exploited during tumorigenesis.  
828 While previous studies have implicated FUTs in multidrug resistance in several cancer types<sup>[29]</sup>,  
829 there currently has no systemic analysis that describes the degree and scope of this  
830 connection. Mapping the pan-cancer pharmacogenomic profiles of these FUTs and SLC35C1  
831 revealed that their expression broadly correlated with resistance to multiple targeted therapies  
832 while their inhibitory cues (i.e., promoter methylation and GDP-Fuc binding site mutations) are  
833 widely associated with a drug-sensitive state. We show that the FUK-SLC35C1-FUT8 core  
834 fucosylation axis is significantly correlated with patient relapse in both large and small patient  
835 cohorts. This fucose metabolism pathway appears to be a pre-requisite in driving our observed  
836 secretome fucosylation in drug-stressed cells and DR clones. High degree pan-cancer  
837 expression of FUT8 and its activity in the Golgi entail the substrate specificity of FUT8 in  
838 fucosylating scaffolds in the secretory pathway. In a much broader context, we corroborated  
839 this by showing that the gene set encoding for CCS components contains a subset of  
840 glycosylation genes that display increased expression signature. We reveal that FUT8 or  
841 SLC35C1 can directly regulate the distinct <60 kDa secretome fucosylation specifically in DR  
842 clones but not in sensitive cells. We note that >100 kDa secretome fucosylation can effectively  
843 be mediated by either of the two factors in sensitive cells, uncovering differential target  
844 processing of core fucosylated products prior to their secretion.

845  
846 Our discovery of PON1 fucosylation as a component of the pan-cancer TIS contextualizes its  
847 systemic regulation in cancer patients upon therapy. Our previous study along with others  
848 suggests a compelling serological biomarker potential for fucosylated PON1 in advanced  
849 SCLC and early HCC<sup>[49,61,62]</sup>. While it is conceivable that overabundance of fucosylated PON1  
850 in the secretion is due to overacting FUTs (i.e., FUT8) and fucose metabolic reactions in the  
851 liver, it does not provide an intuitive explanation for reduced serum PON1 level and restricted  
852 enzyme activity in multiple cancer patients and mouse models profiled previously<sup>[49]</sup> and in  
853 this study. This lack thereof has led us to examine how fucosylation influences the stability of  
854 PON1 prior to its secretion. Our data show that core fucosylation at a sequon located in the  
855 terminal region of the arylesterase domain, a conserved site among mammals, determines  
856 PON1 stability and assures proper folding prior to the secretion of PON1 from DR clones or  
857 PON1-overexpressing cells. This indicates that induction of core fucosylation pathway rewires  
858 the maturation (i.e., folding) of PON1 along the secretory route, generating a more  
859 degradation-resistant PON1 with altered enzyme activity. We speculate that in disease states  
860 where there is an abundant serum fucosylation, non-fucosylated or less fucosylated PON1  
861 cannot persist longer because of proteolytic insults in the blood. Among the three-member  
862 PON family, PON1 and PON3 are both secretory antioxidants bound to high-density  
863 lipoprotein (HDL) and share considerable structural homology<sup>[51,52]</sup>. Our data revealing PON3-  
864 mediated PON1 fucosylation in the Golgi hence establishes an altered Golgi redox



865 homeostasis prior to the secretion of proteins. Indeed, our pathway-focused screen reveals  
866 that defective secretome PON1 fucosylation in the TIS promotes the expression of  
867 transcription factors that regulate response to oxidative stress and pro-inflammatory niche,  
868 and repression of hypoxia in a suppressed DR clone. Concurrently, our transcriptome-wide  
869 analysis demonstrates that genes negatively regulating response to stimulus and cell  
870 communication act as modulators upon inhibition of secretome PON1 fucosylation. Thus,  
871 targeted strategies to control them might limit therapy resistance.

872  
873 Metastasis of DR clones requires TIS-derived signals to spur eventual relapse after therapy<sup>[7,</sup>  
874 <sup>47]</sup>. Previous studies attributed diverse fucosylation linkages in serum Lewis antigens to  
875 metastasis of several cancers<sup>[27,28,29]</sup>. In melanoma, a systems biology approach identified that  
876 transcriptional activation of FUT8 drives metastasis-distinct core fucosylation as opposed to  
877  $\alpha$ 1,2-fucosylation in primary tumors<sup>[58]</sup>. While it remains largely unknown how systemic  
878 aberration in core fucosylation of serum proteins could influence specific steps in the  
879 metastatic cascade, several metastatic phenotypes have been linked with overacting core  
880 fucosylation. For example, FUT8 activity and TGF- $\beta$  receptor fucosylation transduce  
881 downstream effectors of the epithelial-to-mesenchymal transition (EMT) eliciting metastasis.  
882 Moreover, many cancer stem cell (CSC) markers are glycoproteins (i.e., CD44, CD133) that  
883 display differential glycosylation during metastasis<sup>[63,64]</sup>. Our data argue that increased serum  
884 fucosylation immediately precedes lung micro-metastases and is highly aberrant in large, late-  
885 stage metastases, accompanied by high expression of FUT8 in metastasized lung tumors.  
886 This LC metastasis-specific serum fucosylation stimulated the invasion and migration of DR  
887 clones by promoting EMT and CSC gene signatures *in vitro*. Additionally, LC tumors with high  
888 PON1 fucosylation profile displayed higher metastatic propensity than primary tumors. These  
889 findings indirectly support the idea that TIS fucosylation promotes the dissemination of residual  
890 DR tumor cells.

891  
892 To this end, we report an aberrant signature of secretome core fucosylation functionally  
893 associated with multi-targeted therapy resistance in different cancer lineages. Our study  
894 highlights the fucosylation of PON1 as a component of a complex, reactive secretome induced  
895 upon targeted therapy and in turn stimulates resistance. This proof-of-concept study  
896 underscores new insights into the biological basis of cancer recurrence. We acknowledge that  
897 while our findings are all reproducible, they still require further validation, perhaps using  
898 patient-derived animal models. Regardless, the generality of our findings implicates that  
899 targetable aberration in secretome fucosylation and modulatory factors controlling response  
900 to this niche should be considered in managing clinical cancer relapse.

901

## 902 **MATERIALS AND METHODS**

903

### 904 **Data reporting and statistics**

905

906 No statistical methods were used to predetermine sample size. The experiments were not  
907 randomized unless otherwise stated. The investigators were not blinded to allocation during  
908 experiments and outcome assessment. All quantitative data are presented as means  $\pm$  SD  
909 unless otherwise specified. Student's *t*, Mann–Whitney, Dunnett's, Wilcoxon rank-sum,  
910 Kruskal-Wallis, Mantel–Cox and chi-squared tests; and ROC analyses were performed with  
911 GraphPad Prism 8.4. The number of samples or biological replicates (*n*) is indicated in each  
912 figure panel. For bioinformatics, all adjusted *p* values (*p*<sub>adj</sub>) were adjusted to control for the  
913 false discovery rate (FDR) using the Benjamini-Hochberg procedure. Statistical significance  
914 was defined as *p*<0.05.

915

### 916 **Human cancer patient samples and ethics statement**

917

918 All human blood and tissues from three cohorts of patients diagnosed to have lung

919 adenocarcinoma or squamous cell carcinoma or breast carcinoma were collected and  
920 analyzed with approved protocols in accordance with the ethical requirements and regulations  
921 of the Institutional Review Board of Seoul National University Hospital after securing written  
922 informed consent (IRB Nos. 1104-086-359 and B-1201/143-003). All samples were selected  
923 and categorized randomly. Patients underwent surgical resection of their primary or metastatic  
924 tumors at Seoul National University Hospital. Tissue and blood samples were obtained by core  
925 needle biopsy. In the first cohort, 14 samples of plasma and 30 samples of sera from  
926 treatment-naïve and osimertinib-treated NSCLC patients with EGFR-activating mutations  
927 were obtained in a routine diagnosis. In the second cohort, 53 paired lung cancer tumor tissues  
928 and adjacent normal tissues were obtained during surgery. Preoperative chemotherapy was  
929 not conducted on all patients in this cohort. In the third cohort, 33 breast cancer tissue samples  
930 were obtained during surgery. Patients received primary systemic therapy (PST) and adjuvant  
931 chemotherapy. Pathological complete response following PST was defined as complete  
932 disappearance of all invasive cancer or only residual ductal carcinoma in situ. In all cohorts,  
933 post- or preoperative radiation therapy was not performed. Blood and tissue processing and  
934 histopathological data interpretation were overseen by expert pathologist co-authors (H.S.R.,  
935 S.C., T.M.K.). Clinicopathologic information from three patient cohorts was abstracted from  
936 medical records and de-identified as shown in **Supplemental Tables 1, 2, and 3**. Source  
937 DNAs and RNAs were extracted from archived Formalin-Fixed Paraffin-Embedded (FFPE)  
938 tumor and adjacent normal tissues. Lysates were obtained from frozen tumors. Frozen  
939 samples were “snap-frozen” in liquid nitrogen and stored at  $-80^{\circ}\text{C}$ . For plasma collection,  
940 samples were centrifuged at 1,600 g for 10 min within an hour of the blood draw, then an  
941 additional centrifugation of 20,000 g for 10 min was carried out. For serum collection, blood  
942 was allowed to clot for 15-30 min at room temperature (RT) prior to the same centrifugation.  
943 All aliquots were stored at  $-80^{\circ}\text{C}$ . Each aliquot was thawed no more than twice prior to use.  
944 Multiple Affinity Removal System (MARS) HSA/IgG spin columns (Agilent) were used to  
945 deplete albumins and IgGs from blood samples. Depleted samples were concentrated using  
946 Amicon Ultra-2 mL Centrifugal Filters [Merck; 3k molecular weight cut-off (MWCO)] according  
947 to manufacturer’s instructions.

## 948 **Cell lines**

951 Human H292, H1993, H358, HCC4006, H460, H1299, and A549 cell lines [American Type  
952 Culture Collection (ATCC) nos. CRL-1848, CRL-5909, CRL-5807, CRL-2871, HTB-177, CRL-  
953 5803, and CCL-185, respectively; obtained in 2014 to 2016] were grown under standard  
954 conditions in RPMI 1640 (Welgene) supplemented with 10% fetal bovine serum (FBS)  
955 alternative Fetalgro bovine growth serum (RMBIO) or EqualFETAL bovine serum (Atlas  
956 biologicals), 2 mM L-glutamine, and penicillin (100 U/ml)–streptomycin (100  $\mu\text{g}/\text{ml}$ ; Invitrogen).  
957 PC9 and HCC827 [originally provided by J. K. Rho (Asan Medical Center, University of Ulsan,  
958 Seoul, Korea)], EBC-1 [Japanese Collection of Research Bioresources (JCRB) Cell Bank no.  
959 JCRB0820], HCC78 [German Collection of Microorganisms and Cell Cultures (DSMZ) GmbH  
960 no. ACC563], H3122 [originally provided by P. A. Jänne (Dana-Farber Cancer Institute, Boston,  
961 MA, USA)], and SKBR3 [originally provided by D. M. Helfman (KAIST, Daejeon, Korea)], all  
962 obtained in 2017, cell lines were grown in RPMI 1640 with the same supplementation as  
963 mentioned above. Human H1975, H2009, A375, HEK-293T cell lines [ATCC nos. CRL-5908,  
964 CRL-5911, CRL-1619, CRL-3216; obtained in 2017] were grown in Eagle’s minimum essential  
965 medium (Merck), DMEM/F12 (Gibco), and DMEM (Welgene) with the same supplementation  
966 as mentioned above except without additional L-glutamine and contained in addition 1  $\mu\text{g}/\text{mL}$   
967 amphotericin B. Mouse LL/2 (LLC1; ATCC no. CRL-1642; obtained in 2015) was grown in  
968 BME with Earle’s salts (Merck) with the same supplementation as mentioned above. All cells  
969 were grown in a humidified incubator at  $37^{\circ}\text{C}$  with 5%  $\text{CO}_2$  and were tested regularly for  
970 mycoplasma contamination. All cell lines used were negative for mycoplasma  
971 (Cosmogentech mycoplasma test service).

972

973 **Drug-resistant clones**

974

975 To generate DR clones, sensitive cell lines were seeded at low density and continuously  
976 exposed to gradually increasing concentrations of the drug for at least 12 weeks and for as  
977 long as >52 weeks. All clones were derived and expanded from colonies and maintained at  
978 specific drug concentrations. Clones were passaged every 2 or 3 days with adding fresh drug  
979 concentration. Characterization of resistance is summarized in **Supplemental Fig. 6A**.

980

981 **Cell secretomes preparation**

982

983 To generate secretomes,  $3 \times 10^6$  sensitive cells and  $7 \times 10^6$  DR clones were plated on 15-cm  
984 plates in standard media and allowed to adhere overnight. The media was then replaced with  
985 fresh media with 2% dialyzed FBS and indicated drugs for 48 h. FBS was dialyzed in-house  
986 (against 0.15M NaCl until glucose reached <5 mg/dL) using 10k MWCO dialysis tubing (Fisher  
987 Scientific) at 4°C for 6 h. Secretomes were centrifuged at 1,000 r.p.m. for 5 min, vacuum  
988 filtered using 0.45  $\mu$ m cellulose acetate membranes (Whatman), and immediately placed on  
989 ice. For 2D co-culture, secretomes were stored at 4°C, warmed prior to use, and were used  
990 only within 48 h. For 3D co-culture, only freshly prepared secretomes were used and were  
991 further concentrated using Amicon Ultra-15 mL Centrifugal Filters (3k MWCO). For  
992 biochemical assays, secretomes were further concentrated using Amicon Ultra-15 mL  
993 Centrifugal Filters (3k, 10k, 30k, 50k, 100k MWCO as indicated) and depleted of albumins and  
994 IgGs using MARS HAS/IgG spin columns. Aliquots were “snap-frozen” in liquid nitrogen and  
995 stored at -80°C until use. Aliquots were thawed only once.

996

997 **N-glycosylation/fucosylation assays**

998

999 For enrichment of core fucosylated proteins/lipids, we used AAL as a probe to capture  
1000 scaffolds with bound fucose linked ( $\alpha$ 1,6) to N-acetylglucosamine or fucose linked ( $\alpha$ 1,3) to N-  
1001 acetylglucosamine related structures. We note that AAL also reversibly binds fucose attached  
1002 to nucleic acids. Bio-spin columns (Bio-Rad) were packed with 1.5 mL agarose bead-bound  
1003 AAL (Vector Laboratories). Agarose beads were initially maintained in an inhibiting solution  
1004 [10 mM HEPES (pH 7.5), 0.15 M NaCl, 10 mM fucose, 0.04% NaN<sub>3</sub>] at 4°C. Concentrated  
1005 secretomes (500  $\mu$ L) or sera/plasma (40  $\mu$ L) were thawed at 4°C in ice, diluted in 1.5 mL AAL  
1006 adsorption buffer (AffiSpin-AAL kit; GALAB), incubated in ice for 5 min, loaded onto packed  
1007 bio-spins, and incubated at 4°C for at least 12 h. Unbound proteins/lipids were removed by  
1008 flow-through (only by gravity) and washing with adsorption buffer and PBS. Fucosylated  
1009 proteins were eluted twice with 50  $\mu$ L AAL elution buffer B1 or 40  $\mu$ L glycoprotein eluting  
1010 solution for fucose-binding lectins (Vector Laboratories) at 4°C for 1 h per round. Remaining  
1011 bound fucosylated proteins were forcedly eluted. Samples were scaled-up to produce at least  
1012 80  $\mu$ L eluted proteins. All reagents and columns were pre-chilled in ice prior to use. Eluted  
1013 proteins were precipitated using the trichloroacetic acid (TCA)-sodium deoxycholate (DOC)  
1014 method as described previously with minor modifications<sup>[65]</sup>. Protein concentrations were  
1015 measured using the Bradford reagent (Bio-Rad).

1016

1017 We developed a sandwich ELLA assay to quantify fucosylated proteins in AAL-enriched  
1018 samples (**Supplemental Fig. 5**). 96-well microtiter plates (Koma Biotech) were coated with  
1019 0.4  $\mu$ g native, unconjugated MAL II, SNA, LCA, BTL, PSA, UEA1, ConA, or RCA1 lectins  
1020 (Vector Laboratories) in 100  $\mu$ L coating buffer (15 mM Na<sub>2</sub>CO<sub>3</sub>, 35 mM NaHCO<sub>3</sub>, 0.02%  
1021 NaN<sub>3</sub>, pH 9.6) at 37°C for 2 h. The plates were additionally incubated with 0.1 mL oxidation  
1022 buffer (20 mM NaIO<sub>4</sub>) per well. Lectin solution was removed by three washes with PBS-  
1023 Tween-20 (0.05%; PBST). Plates were then blocked with 3% bovine serum albumin (BSA) in  
1024 PBST for 1 h at RT. Concentrated secretomes, lysates, or sera/plasma were added to each  
1025 well and incubated at RT for 2 h. The plate was gently washed three times with PBST to  
1026 remove unbound proteins. 100  $\mu$ L of 4  $\mu$ g/mL biotinylated AAL (Vector Laboratories) was

1027 added and incubated at RT for 90 min. Lectin solution was removed and HRP-conjugated  
1028 streptavidin (Biolegend) was added and incubated at RT for 90 min followed by two additional  
1029 washes with PBST. 1-Step Turbo TMB-ELISA substrate solution (Thermo Scientific) was used  
1030 for detection. Absorbance was measured at 450 nm in a microplate reader (VersaMax,  
1031 Molecular Devices).

1032  
1033 For N-glycan release assay, we optimized a previously described protocol to quantify  
1034 glycosidase-induced release of N-glycans<sup>[39]</sup>. Briefly, 20 uL concentrated samples were mixed  
1035 with 2.5 uL sodium phosphate or citrate buffer (500 mM, pH 7.5) and 10 uL total 8U PNGase  
1036 F or 10U Endo S/F1 and incubated at 37°C for 12 h in a humidified chamber and heat-  
1037 quenched at 95°C for 5 min. Reactions were then mixed with 20 uL 2.5 M TCA solution,  
1038 vortexed for 5 min, and centrifuged at 12,000 g for 30 min. 15 uL supernatants were mixed  
1039 with 7.5 uL of 4 M NaOH, 12.5 uL 1.7 mM aqueous WST-1 solution, and incubated for 1 h at  
1040 50°C. For in-gel N-glycan release, in-gel proteins were trypsin digested overnight (see details  
1041 below). Samples containing extracted peptides were reduced in a SpeedVac until at least 10  
1042 uL was reached. Reduced samples were mixed with 10 uL H<sub>2</sub>O and subjected to the same  
1043 protocol as mentioned above. Absorbance was measured at 584 nm. The amount of released  
1044 N-glycans were quantified using maltose (Sigma), an N-glycan mimic in this assay, as an  
1045 external standard.

1046  
1047 AAL blotting was performed as described previously<sup>[49]</sup>. Briefly, AAL-enriched precipitated  
1048 samples (10-15 µg concentrated cell secretome or 3-5 µg of sera/plasma proteins) were  
1049 subjected to 12% SDS-PAGE. The gels were transferred to nitrocellulose membranes  
1050 (Whatman). The membranes were blocked with 1x Carbo-free blocking solution (Vector  
1051 Laboratories) at 4°C for at least 2 h and incubated with 5-20 µg/mL of biotinylated AAL at RT  
1052 for 1 h. Membranes were washed three times with PBST, incubated with HRP-conjugated  
1053 streptavidin at RT for 1h, washed three times with PBST, and developed using an ECL system  
1054 (Amersham).

1055  
1056 Glycoprotein staining of SDS-PAGE gels was performed using the GelCode glycoprotein  
1057 staining kit (Pierce) according to manufacturer's protocol. Stained glycols appear as  
1058 magenta/pink bands.

1059  
1060 For HLE of target protein fucosylation, we modified a previously described protocol using an  
1061 ELISA starter kit (Koma Biotech)<sup>[49]</sup>. Briefly, 96-well microtiter plates were coated with 120 ng  
1062 PON1 (18155-1-AP, Protein Tech), AFP (ab3980, Abcam), or A1AT (ab9399, Abcam)  
1063 monoclonal antibodies in 100 uL coating buffer at 37°C for 3 h. 100 uL of oxidation buffer was  
1064 added per well for 30 min and blocked with 3% BSA in PBS for 2 h at RT. The plates were  
1065 washed four times with PBST. All AAL-enriched samples were diluted 10-fold in PBS, 100 uL  
1066 of each sample was added to each well, and incubated at RT for 2 h. After multiple washes  
1067 with PBST, 2 µg/mL biotinylated AAL was added and incubated at RT for 90 min. Lectin  
1068 solution was removed and HRP-conjugated streptavidin (Biolegend) was added and incubated  
1069 at RT for 90 mins followed by two additional washes with PBST. A 1-Step Turbo TMB-ELISA  
1070 substrate solution (Thermo Scientific) was used for detection. Absorbance was measured at  
1071 450 nm.

1072  
1073 For lectin fluorescent staining of cells and paraffin sections, we used 15 µg/mL fluorescein-  
1074 labeled AAL (Vector Laboratories) or 4 µg/mL FITC-conjugated UEA1 (Thermo Scientific)  
1075 according to manufacturer's protocol and following standard immunofluorescence protocols.

1076  
1077 GDP-Fuc activity of FUT8 was assayed using GDP-Glo glycosyltransferase assay kit  
1078 (Promega) following manufacturer's protocol. Luminescence was read on luminometer  
1079 (POLARstar Omega).

1080

1081 For in-culture and exogenous secretome/serum de-N-glycosylation, 10 µg/mL recombinant  
1082 PNGase F (9109-GH, R&D Systems; 36405.01, SERVA) and 8U PNGase F (P0704L, NEB;  
1083 P7367, Sigma) were used, respectively, unless otherwise specified, for indicated times  
1084 described in each figure description. PNGase F was not removed in any of the in-culture  
1085 experiments for indicated incubation periods, except in **Supplemental Fig. 14A** where  
1086 PNGase F-treated media was replaced with drug-containing fresh media for drug sensitivity  
1087 assay. Protein/lysate sample de-N-glycosylation using PNGase F (NEB), Endo S (NEB), or  
1088 Endo F1 (Sigma) was performed following manufacturer's protocol with slight modifications on  
1089 incubation period.

1090

### 1091 **Cell tracking experiments**

1092

1093 To fabricate a 3D tumor spheroid array, polydimethylsiloxane (PDMS)-based positive master  
1094 mold with an array of 225 spherical microwells (15×15) was prepared as we previously  
1095 described<sup>[66]</sup>. The mold was immersed in 70% (v/v) ethanol and sterilized for 30 min in UV  
1096 before use. Agarose powder (LPS solution) was added to RPMI 1640 at a concentration of 3%  
1097 (w/v) and heated for a short time to dissolve completely. Before gelation, the fully-melted  
1098 agarose solution was poured in a 35-mm cell culture dish (3 mL/dish; SPL) and the sterilized  
1099 master mold was immediately inserted into the gel solution to create the microwells. After the  
1100 agarose was solidified at RT for 20 min, master mold was gently removed. PBS (3 mL/dish)  
1101 was added to the agarose-based microwell to keep them hydrated before use. Cell admixtures  
1102 seeded into these microwells can immediately form spheroids (**Supplemental Movie 1** and  
1103 **Fig. 2B**). Cell line variability in the number and size of spheroids is observed per well  
1104 (**Supplemental Fig. 6D**).

1105

1106 For tracking experiments in cell admixtures, sensitive cells were labeled with CellTracker-  
1107 Green (CMFDA) while DR clones with CellTracker-Red (CMTPX) or -Deep Red (Thermo  
1108 Scientific) or transfected with pCAG-LifeAct-RFP (Ibidi) according to manufacturer's protocol.  
1109 RFP-labeled clones were stably selected using geneticin (Thermo Scientific) following  
1110 manufacturer's instructions. Labeled cells and clones were filtered using a cell strainer (Merck)  
1111 and seeded either as 'one pot' or 'sequential layer' 2D and 3D admixtures as detailed (**Fig. 2A**  
1112 and **Supplemental Fig. 16A**). 3D admixtures were live imaged while 2D admixtures were  
1113 fixed with 3.7% formaldehyde in PBS for 5 min and washed with PBS prior to imaging. Live  
1114 imaging of 3D tumor spheroids was performed using a fluorescence inverted microscope  
1115 (Nikon Eclipse Ti) equipped with a CFI Apochromat TIRF objective. Time-lapse images were  
1116 acquired at 15 min frame intervals to minimize photobleaching and phototoxicity by high  
1117 illumination and analyzed by 3D reconstruction of stacked axes. Imaging of 2D admixtures  
1118 was performed using a fluorescence inverted microscope (Leica DMI3000 B). Cell tracking  
1119 and fluorescence analyses were performed using the plug-in TrackMate in Fiji/ImageJ.

1120

### 1121 **Plasmids, RNAi, and transfections**

1122

1123 60 nM to 120 nM target-specific smart pool (mix of at least two different sequences each;  
1124 **Supplemental Table 4**) of short interfering RNAs (siRNAs) or non-targeting scrambled  
1125 siRNA/siLuciferase (IDT Korea) were delivered with Lipofectamine 3000 (Life Technologies)  
1126 or DharmaFECT (Dharmacon) according to manufacturer's instructions. Target siRNAs were  
1127 obtained from IDT Korea, Life Technologies, or Bioneer. Unless otherwise specified, most  
1128 assays were analyzed 48 h post-transfection. pCMV6-AC-Myc-DDK and pCMV6-FUT8-Myc-  
1129 DDK (Origene) expression plasmids were delivered with Lipofectamine 3000 or FuGene 6  
1130 (Promega) according to manufacturer's instructions. Transfections were performed for 48 h.  
1131 To establish PON1 and SLC35C1 knockout (KO) cells, pLKO.1-puro or pLKO.1 plasmids  
1132 encoding target shRNA constructs (**Supplemental Table 4**; selected from TRC shRNA Library,  
1133 Broad; purchased from Origene) were cloned as previously described. The sequence of the  
1134 constructs was verified by DNA sequencing (Origene). Scrambled shRNA (Addgene) was

1135 used as shControl. Lentiviral co-transfection of 8 µg of cloned transgene plasmids, 1 µg  
1136 pMD2.G (envelope plasmid; Addgene), and 3 µg psPAX2 (packaging plasmid; Addgene) was  
1137 performed using iN-fect (Intron Biotechnology) in HEK293T cells following manufacturer's  
1138 protocol and transduction in indicated cell lines using standard procedures. Lentivirus titer was  
1139 determined using Lenti-X p24 rapid titer kit (Takara Bio). 2-8 µg/mL puromycin was added  
1140 gradually to select stable cell lines for two weeks. Stably selected KO cells were maintained  
1141 in 0.1 µg/mL puromycin-containing complete media. To establish PON1-overexpressing cells,  
1142 bicistronic pLVX-EF1α-IRES-puro (Takara Bio) encoding the CDS of human PON1 single  
1143 mRNA transcript was cloned as previously described. The empty vector was used as a control  
1144 (-CC). Co-transfection of plasmids, transduction, and selection were performed as above,  
1145 except infected cells were selected in 1 µg/mL puromycin. Validation of targeted  
1146 overexpression or RNAi is shown in **Supplemental Fig. 25**.

1147

### 1148 **Site-directed mutagenesis**

1149

1150 To generate mutant PON1 constructs, a PCR-based Q5 site-directed mutagenesis kit (NEB)  
1151 was used according to the manufacturer's instructions. PON1 cDNA template was cloned into  
1152 pcDNA3.1 (Genscript) as described previously<sup>[67]</sup>. The mutagenesis primers were designed  
1153 using the Primer X Tool (<http://bioinformatics.org/primerx/>). FL or mutant PON1 constructs  
1154 were transfected using Xfect transfection reagent (Clontech) according to manufacturer's  
1155 protocol.

1156

### 1157 **Gene expression analysis**

1158

1159 Whole RNA (1-3 µg total per 10 µL volume) was isolated using RNAeasy mini kit (QIAGEN)  
1160 or TRIzol (Life Technologies) following manufacturer's protocol. Tumor tissues were  
1161 homogenized in a handheld homogenizer using RLT-ME buffer (Qiagen). Complementary  
1162 DNA (cDNA) was generated using the Transcriptor First Strand cDNA synthesis kit (Roche).  
1163 RNA was treated with deoxyribonuclease I (DNase I; Takara) and reverse-transcribed using  
1164 RevertAid reverse transcriptase (Fermentas). cDNA was amplified by an SYBR Green PCR  
1165 master mix (Applied Biosystems). Differential RNA levels were assessed using Taqman gene  
1166 expression assays (Life technologies). Quantitative polymerase chain reaction (qPCR) was  
1167 performed using SureCycler 8800 (Agilent) and AriaMx Real-Time PCR System (Agilent).  
1168 Relative gene expression was normalized to internal control genes: GAPDH or ACTB. For  
1169 nucleic acids extraction (total RNA and genomic DNA) from FFPE tumor samples, we used  
1170 FFPE All-Prep kit (QIAGEN) following the manufacturer's protocol. Small portion of specimens  
1171 were prepared from ~80-µm slices of FFPE tumor blocks, followed by dewaxing using  
1172 Deparaffinization Solution (QIAGEN). Purified RNA was subjected to reverse transcription  
1173 PCR (RT-PCR) and qPCR as above. Primers used in this study are detailed in **Supplemental**  
1174 **Table 5**.

1175

### 1176 **Immunoblotting and immunoprecipitation**

1177

1178 Enrichment of golgi and ER was carried out using Minute Golgi/ER enrichment kit (Invent  
1179 Biotech) and isolation of nuclear and cytosolic extracts was carried out using NE-PER Nuclear  
1180 and Cytoplasmic Extraction Reagents (Pierce) following the manufacturer's instructions.  
1181 Whole-cell pellets were lysed as described previously<sup>[68]</sup>. Following surgery, xenograft tumors  
1182 were flash frozen in liquid nitrogen. A portion of the frozen tumor excised from mice was  
1183 thawed on ice and homogenized in Complete Lysis Buffer (Active Motif) for whole lysate  
1184 extraction Protein concentrations were determined using Bradford reagent. Samples were  
1185 boiled for 5 min in Laemmli buffer. Equivalent amounts of proteins (usually 30-50 µg) were  
1186 separated by SDS-PAGE (usually on 7.5, 10, and 12% gels). For immunoprecipitation, PON1  
1187 monoclonal antibody was coupled to protein G-Sepharose 4B beads (GE Healthcare) and  
1188 eluted as described previously<sup>[69]</sup>. Proteins were transferred onto Immobilon PVDF

1189 membranes (Millipore) using a semidry transfer system (Amersham). The detection system  
1190 was Clarity Max Western ECL Substrate (Bio-Rad) and Western Lightning Plus-ECL  
1191 (PerkinElmer). Secondary antibodies were either goat antibodies to mouse immunoglobulin  
1192 G–horseradish peroxidase (IgG-HRP; DACO), mouse IgGk-HRP (Santa Cruz Biotechnology)  
1193 or donkey antibodies to rabbit IgG-HRP (GE Healthcare). For cross-linking, cells were pre-  
1194 starved in media containing 2% dialyzed FBS prior to cross-linking using 1 mM EGS for 45  
1195 min at 4°C as previously described. Briefly, lysates were diluted twofold in assay buffer and  
1196 incubated with capture beads for FUT8 (protein G-agarose beads; Abcam) overnight. Lysates  
1197 were clarified by centrifugation at 16, 400 g for 15 min, and then precleared for 30 min with  
1198 agarose resin. Lysate was then incubated with protein A/G agarose and PON1 antibody  
1199 overnight at 4°C. The next day, the resin was washed six times with lysis buffer and then  
1200 incubated with 2 M hydroxylamine HCl in phosphate-buffered saline (pH 8.5) for 6 h at 37°C.  
1201 The resin was then removed, and the supernatant was used for indicated assay. Primary  
1202 antibodies used for immunoblotting were PON1 (ab24261, Abcam), RCAS1 (12290, CST),  
1203 and GAPDH (6C5, Santa Cruz Biotechnology). Antibodies used for immunoprecipitation were  
1204 PON1 (17A12, Santa Cruz Biotechnology) and FUT8 (ab191571, Abcam).

1205

## 1206 **ELISA**

1207

1208 Sandwich-based ELISA kits were used to detect PON1 (RayBiotech), FUT8 (LSBio), and ATF6  
1209 (Novus Biologicals) following manufacturer's protocol. For ELISA detection of SLC35C1, 96-  
1210 well microtiter plates were manually pre-coated with SLC35C1 antibody (CSB-  
1211 PA839285LA01HU, Cusabio) similar to HLE. Absorbance was measured at 450 nm.

1212

## 1213 **Polypeptide synthesis assay**

1214

1215 EZClick global protein synthesis kit (Biovision) was used to detect nascent protein synthesis  
1216 following manufacturer's protocol. This assay is based on alkyne analog of puromycin, O-  
1217 Propargyl-puromycin (OP-puro). OP-puro stops translation by forming covalent conjugates  
1218 with the nascent polypeptide chains. Truncated polypeptides are rapidly turned over by the  
1219 proteasome and can be detected based on a click reaction with the fluorescent azide.  
1220 Fluorescence was measured by flow cytometry using LSR Fortessa (BD Biosciences).  
1221 Excitation and emission wavelengths were set at 440 and 530 nm, respectively. Analysis was  
1222 done using BD FACSDiva software.

1223

## 1224 **Trypsin sensitivity and CHX chase assays**

1225

1226 To evaluate the folding status of PON1, we exogenously treated lysates with trypsin as  
1227 described previously<sup>[70]</sup>. Briefly, lysates were clarified by centrifugation at 17,800 g at 4°C for  
1228 10 min. 1 mg/mL 50 µL aliquots of cleared lysates were incubated with 2 µL of indicated trypsin  
1229 concentration (Promega) at 4°C for 15 min. 50 µL stop buffer (1× SDS sample buffer, 100 mM  
1230 dithiothreitol, 10× protease inhibitor cocktail) was added to the samples and incubated at  
1231 100°C for 5 min. 30 µg of each sample was separated by SDS-PAGE and immunoblotted. To  
1232 evaluate PON1 stability, cultured cells in 6-well plates were incubated with 25 µg/mL CHX  
1233 (Sigma) at indicated times. Cells were subjected to immunoblotting or other assays as  
1234 indicated.

1235

## 1236 **Phospho-RTK array and kinase phosphorylation assays**

1237

1238 Phosphorylated RTKs were measured using PathScan human RTK signaling antibody array  
1239 kit (R&D Systems) according to manufacturer's instructions. Tyrosine 1068 phosphorylation of  
1240 EGFR, pan-tyrosine phosphorylation of MET and HER3/ErbB3, and tyrosine 1150/1151  
1241 phosphorylation of Insulin Receptor β were assessed by solid-phase sandwich ELISA (CST  
1242 PathScan kits) following manufacturer's protocol. The assay quantitatively detects

1243 endogenous levels of the indicated targets. Absorbance was measured at 450 nm.

1244

### 1245 **Signal 45-pathway reporter array**

1246

1247 Signal 45-pathway reporter arrays (QIAGEN) were used to simultaneously measure the  
1248 activity of 45 transcription factors/signaling pathways according to manufacturer's protocol.  
1249 Briefly, cell admixtures grown for 5 days under different conditions were transferred to Signal  
1250 Finder 96-well plates (at least 30,000 cells/well). Reporter constructs resident in each well  
1251 were introduced into cells via reverse transfection. Cell admixtures were grown in Opti-MEM  
1252 (Gibco) supplemented with 5% FBS and 0.1 mM MEM non-essential amino acids (NEAA;  
1253 Gibco) for 48 h. Cell admixtures were then lysed and luciferase activity was measured using  
1254 dual-emission optics of a plate reader (POLARstar Omega).

1255

### 1256 **Proliferation, survival, cell cycle, apoptosis, and senescence assays**

1257

1258 Cell proliferation and survival were assessed by sulforhodamine B (SRB) and colony formation  
1259 assays, as we previously described<sup>[69]</sup>. Cell sorting, cell cycle analysis by quantitation of DNA  
1260 content, and cell death detection in the sub-G1 peak were performed by flow cytometry as we  
1261 previously described using FACSCalibur (BD Biosciences)<sup>[69]</sup>. Analysis was done using BD  
1262 CellQuest Pro software. At least 20,000 cells were used for each analysis. Changes in the  
1263 percentage of cell distribution at each phase of the cell cycle were determined. To isolate  
1264 apoptotic bodies, cells grown in indicated conditions were transferred to serum-free media  
1265 with 0.35% BSA and cell debris was collected after 24 h. Cells were centrifuged at 300 g for  
1266 10 min, the remaining cell debris was removed, and the soluble secretome was collected. The  
1267 mixture was centrifuged at 16,500 g for 20 min using a super speed vacuum centrifuge (Vision  
1268 Scientific). To detect senescence, we measured SA- $\beta$ -gal activity using senescence  $\beta$ -  
1269 galactosidase staining kit (CST) following manufacturer's protocol. SA- $\beta$ -gal positive cells  
1270 were quantified based on three independent images from different stained regions analyzed  
1271 by digital inverted light microscopy (40 $\times$  phase-contrast; Leica DMI1). To evaluate senescent  
1272 gene signature and SASP activity, we measured the gene expression of p16, LNMB1, IL-1 $\alpha$ ,  
1273 IL-6, MMP-3, MMP-9, CXCL-1, CXCL-10, and CCL20 by qPCR.

1274

### 1275 **Caspase activity and intracellular ATP assays**

1276

1277 Caspase 3/7 and 9 activities were assessed using a fluorescence-based Apo-ONE  
1278 homogenous caspase 3/7 assay kit (Promega) and luminescence-based caspase-glo 9 assay  
1279 system (Promega), respectively, following manufacturer's protocol. Excitation and emission  
1280 wavelengths were set at 560 and 590 nm, respectively. Luminescence was read on  
1281 luminometer. For ATP measurement, cells were seeded in 96-well plates and were subjected  
1282 to indicated treatment/culture conditions all in nutrient-restricted media (10% dialyzed FBS).  
1283 ATP levels were measured using the luminescence-based ATPLite system (Perkin-Elmer)  
1284 following manufacturer's instructions.

1285

### 1286 **Enzyme activity assays**

1287

1288 Paraoxonase activity was assessed based on 4-nitrophenol formation as described  
1289 previously<sup>[71]</sup>. Paraoxon (O,O-Diethyl O-(4-nitrophenyl) phosphate; Sigma) was used as a  
1290 substrate. Absorbance was measured at 412 nm. One unit of paraoxonase activity was defined  
1291 as 1 nM of 4-nitrophenol formed per min. Arylesterase activity was assessed based on phenol  
1292 formation as described previously<sup>[71]</sup>. Phenylacetate (Sigma) was used as a substrate.  
1293 Absorbance was measured at 217 nm. One unit of arylesterase activity is equal to 1 mM of  
1294 phenylacetate hydrolyzed per min.

1295

1296



## 1297 **ROS/RNS and cytokine measurements**

1298

1299 Free radical ROS/RNS was measured using OxiSelect *in vitro* ROS/RNS assay kit (Cell  
1300 Biolabs) according to manufacturer's protocol. This assay used DCFH probe and oxidative  
1301 reactions were measured against H<sub>2</sub>O<sub>2</sub> or DCF standard. Excitation and emission  
1302 wavelengths were set at 480 and 530 nm, respectively. IL-6, TFN- $\alpha$ , and GM-CSF levels were  
1303 quantified using ELISA kits pre-coated with indicated capture antibodies per manufacturer's  
1304 instructions (Sigma). IL-6 levels were preliminarily detected using a Q-Plex Human cytokine  
1305 screen (16-plex; Quansys Biosciences). Absorbance was measured at 450 nm.

1306

## 1307 **Immunofluorescence**

1308

1309 Cells were plated onto 0.1% gelatin-coated glass-bottom 30-mm dishes (except for 3D tumor  
1310 spheroids) and incubated overnight unless otherwise specified. The cells were fixed with 4%  
1311 paraformaldehyde (in PBS) for 8 min at RT, quenched for 1 min in 10 mM Tris (in PBS) at RT,  
1312 and permeabilized in 0.1% Triton X-100 (in PBS). Cells were then blocked in 2% bovine serum  
1313 albumin (BSA) (in PBS containing 0.01% Triton X-100) for 30 min at RT and incubated with  
1314 primary antibodies diluted in 2% BSA for 2 h. Alexa Fluor or fluorescein isothiocyanate-  
1315 conjugated secondary antibodies were used to label primary antibodies. DAPI (4',6-diamidino-  
1316 2-phenylindole; 0.35  $\mu$ g/ml) was used to counterstain the nuclei. Cells were mounted using  
1317 VECTASHIELD Mounting Medium (Vector Laboratories). Confocal microscopy was carried out  
1318 using a ZEISS LSM 780 ApoTome microscope (Carl Zeiss) using C-Apochromat 40 $\times$  lens with  
1319 a numerical aperture of 1.20. Primary antibodies used for immunofluorescence were PON1  
1320 (ab24261, Abcam), PON3 (ab42322, Abcam), ATF6 (PA5-20215, Invitrogen), RCAS1 (12290,  
1321 CST), and XBP1 (ab37152, Abcam).

1322

## 1323 **Immunohistochemistry**

1324

1325 Human or mouse FFPE tumor tissue sections were deparaffinized in xylene alternative (Histo-  
1326 Clear, EMS; 3 $\times$ 5 min) and rehydrated in EtOH/H<sub>2</sub>O gradient series (100%, 95%, 70%, 40%,  
1327 5 min each). The rehydrated sections were washed in TBS for 10 min. Epitopes were  
1328 unmasked using heat-induced retrieval method with the use of the pre-heated Tris (10 mM  
1329 Tris base, 0.05% Tween 20, pH 8.0) and citrate buffers (10 mM sodium citrate, 0.05% Tween  
1330 20, pH 6.0). Sections were pressure-cooked for 12 min in Tris buffer, transferred to citrate  
1331 buffer, heated for 12 min, cooled at RT for 40 min, and washed with TBS containing 0.1%  
1332 Twee-20 for 10 min. Sections were permeabilized with 0.3% Triton X-100 in TBS for 45 min  
1333 and washed in TBS (2 $\times$ 5 min). Endogenous peroxidase activity was quenched in a peroxidase  
1334 solution (0.3% H<sub>2</sub>O<sub>2</sub> in TBS) and sections were blocked in a universal blocking solution (10%  
1335 normal donkey serum in 1% BSA/TBS) or carbo-free blocking solution (for fucosylation  
1336 detection) for 2 h. Slides were blotted to remove the serum and then primary antibodies were  
1337 applied at predetermined concentrations (1:400 or 1:800). Slides were incubated overnight at  
1338 4°C in a humidified chamber and washed with TBS (3 $\times$ 5 min). Biotinylated link and HRP-  
1339 conjugated secondary antibodies were applied onto sections and were incubated for 2 h in a  
1340 dark humidified chamber RT followed by washing. Replicate slides were also stained H&E  
1341 (Vector Labs) according to manufacturer's protocol. A VECTASHIELD hard set mounting  
1342 medium (Vector Labs) was used to mount the slides. The positive staining density was  
1343 measure using a Leica CCD camera connected to a Leica DMI1 microscope. Biotinylated AAL  
1344 (20  $\mu$ g/ml) was used to detect fucosylation. Primary antibodies used were PON1 (18155-1-AP,  
1345 Protein tech) and PON3 (OTI1A5, Thermo Scientific).

1346

## 1347 **Xenografts and induction of lung metastases**

1348

1349 Procedures were performed at the College of Veterinary Medicine, Seoul National University  
1350 following guidelines approved by the Institutional Animal Care and Use Committee. 5-7 week

1351 old C57BL/6 background male mice were purchased from Orient Bio Inc. and fed with free  
1352 access to standard diet (PMI LabDiet) and water. For xenografts, LLC-CC and LLC-PON1 cell  
1353 suspensions ( $1.2 \times 10^7$  cells) in 200  $\mu$ L of culture medium/growth factor-reduced Matrigel (BD  
1354 Biosciences) in a 1:1 ratio were subcutaneously injected into the right flank of each mouse.  
1355 For metastases, LLC-CC and LLC-PON1 cell suspensions ( $2.5 \times 10^6$  cells) in 150  $\mu$ L culture  
1356 media were intravenously injected through the tail vein. Mice were sacrificed at indicated times  
1357 after injection (**Supplemental Fig. 24**, A and M). Lung, liver, spleen, and other sites that  
1358 developed primary or metastasized tumors were collected in ice-cold PBS for further testing.  
1359 All mice were maintained under continuous sedation by administering 2-4% isoflurane (Sigma)  
1360 via an anesthesia mask during surgery and prior to euthanasia. Tumor volume was determined  
1361 using digital caliper measurements and calculated using the following formula: tumor volume  
1362 =  $(D \times d^2)/2$ , in which D and d refer to the long and short tumor diameter, respectively. The  
1363 body weight of each mouse was also monitored. To sample serum, mice were isolated in a  
1364 cage under an infrared lamp for few min to increase blood flow. Portion of the tails were  
1365 swabbed and blood was collected. Blood samples were transferred to tubes, incubated at 4°C  
1366 for at least 4 h, and centrifuged at 10,000 g at 4°C for 10 min. Serum was collected and re-  
1367 centrifuged and “snap frozen” in liquid nitrogen until further use.

1368

### 1369 **Transwell invasion and gap-closure assays**

1370

1371 Chemotactic invasion assay was carried out in Boyden chamber wells (24-well format, 8  $\mu$ m  
1372 pore size; Corning) with matrigel/ECM-based membrane. Matrigel matrix (Corning) was  
1373 diluted to 1 mg/mL with serum-free Opti-MEM and applied on the insert in the upper chambers.  
1374 For chemotaxis induction of cells, 800  $\mu$ L culture media supplemented with 8% FBS or  
1375 indicated mouse serum was added to the lower chambers. After incubation for 24 h or 48 h at  
1376 standard culture conditions, the membrane inserts were removed and the non-invading cells  
1377 were removed from the upper surface of the membrane while invading cells were removed  
1378 non-enzymatically using  $1 \times$  cell dissociation solution (Corning) following manufacturer’s  
1379 protocol. Invaded cells were stained with Mayer’s modified hematoxylin (Abcam) for 20 min  
1380 and washed with water. For gap closing assay, cells were seeded and grown until confluent.  
1381 A P10 tip was used to generate a gap. Cells were washed and secretomes were added.  
1382 Images were acquired overtime to monitor gap closure using a digital inverted light microscopy.  
1383

### 1384 **Label-free proteomics**

1385

1386 Precipitated AAL-enriched secretomes (45  $\mu$ g) were run on a 1 mm thick 10% SDS-PAGE gel  
1387 and stained with CBB G-250 staining solution (Bio-Rad) at RT for 1.5 h. 30-70 kDa lane  
1388 portions were excised into 2 $\times$ 2 mm cubes and transferred to Protein Lo-Bind tubes  
1389 (Eppendorf). Excised gels were partitioned into tubes, and destained multiple times in 75 mM  
1390 ammonium bicarbonate (Sigma) and 40% EtOH (1:1) in a shaking rack. Destained gel pieces  
1391 were washed with 100 mM ammonium bicarbonate and acetonitrile (1:1), vortexed, and  
1392 incubated at RT for 15 min. Gel pieces were diluted with 100 mM ammonium bicarbonate and  
1393 reduced with 10 mM dithiothreitol at 51°C for 1 h. Gel pieces were cooled down to RT for 30  
1394 min followed by alkylation with 20 mM of iodoacetamide at RT for 45 min in the dark. Gel  
1395 pieces were dehydrated in 100% acetonitrile and dried in a SpeedVac. In-gel proteins were  
1396 digested with trypsin at a protein:enzyme ratio of 20:1 at 37°C for 12 h in a shaking incubator.  
1397 Peptides were extracted in 100  $\mu$ L extraction buffer (5% acetic acid/acetonitrile; 1:2) and  
1398 incubated at 37°C for 15 min in a shaking incubator. Tryptic peptide mixture was eluted from  
1399 the gel with 0.1% acetic acid.

1400

1401 Mass spectrometry was performed as we described previously<sup>[49]</sup>. Briefly, nanospray liquid  
1402 chromatography tandem mass spectrometry (LC-MS/MS) was performed on an LTQ-Orbitrap  
1403 mass spectrometer (Thermo Electron) coupled to Agilent 1200 series G1312B binary pump  
1404 SL and NanoLC AS-2 autosampler (Eksigent Technologies). Peptide mixtures (2  $\mu$ L per

1405 sample) were loaded via the autosampler on 75- $\mu\text{m}$  (inner diameter) fused silica capillary  
1406 columns with electrospray tip packed with C18 reversed phase resin (Magic C18, 5- $\mu\text{m}$   
1407 particles, 200- $\text{\AA}$  pore size; Michrom BioResources). Peptides were separated by reversed  
1408 phase liquid chromatography with mobile phases as we described previously. The tandem  
1409 mass spectra were processed using Sorcerer 3.4 beta2 (Sorcerer Web interface). All MS/MS  
1410 samples were analyzed using SEQUEST Cluster (Thermo Scientific) and Mascot generic  
1411 format (MGF) files were set to query the human IPI v3.68 database. Searches were performed  
1412 with and without oxidation of methionine and carbamidomethyl modification of cysteine as  
1413 variable modifications. False positives and false discovery rates were calibrated through the  
1414 decoy option during data search in Sorcerer to reduce noise effects. Scaffold v4.0.5 (Proteome  
1415 Software) was used to validate MS/MS-based peptide and protein identification.  
1416 PeptideProphet was used to validate peptide and protein assignments to MS/MS spectra (>95%  
1417 probability). Subtractive proteomic analysis for each dataset was performed by normalization  
1418 using total ion current (TIC; normalized by average of all the TIC values of the spectra  
1419 assigned to a protein). MS .RAW files were processed in MaxQuant<sup>[72]</sup>, version 1.5.5.2. The  
1420 FASTA file Homo\_sapiens.GRCh38.pep.all.fa was downloaded from Ensembl.  
1421

## 1422 RNA-seq

1423  
1424 Low density H1993-GR were grown under indicated conditions for 48 h (**Fig. 6A**) and whole  
1425 RNA was extracted using the RNAeasy mini kit. 2 $\times$ 10<sup>1</sup> paired-end RNA-seq libraries were  
1426 constructed using TruSeq stranded total RNA H/M/R prep kit and sequenced using the  
1427 Novaseq6000 system (Illumina). Raw paired-end sequencing reads were mapped to the  
1428 human genome (build hg38) with HISAT2 v2.1.0 using default parameters except with the  
1429 options "--dta" and "--dta-cufflinks". Stringtie v2.0.6 was used to quantify the expression of  
1430 genes and transcripts by employing transcriptome information from GENCODE v27. Ballgown  
1431 package was used to perform differential gene expression analysis generating FPKM for each  
1432 gene. Genes with FDR<0.05, fold change larger than 2 or smaller than 0.7-fold, and average  
1433 read counts larger than 10 were treated as differentially expressed genes. Gene ontology  
1434 analysis was performed using DAVID 6.8. GO of biological process or molecular function were  
1435 detected and summarized. GO terms with P<0.01 were selected as significant. Semantic-  
1436 similarity network visualization of GO terms were done using REVIGO ([www.revigo.irb.hr](http://www.revigo.irb.hr)).  
1437 Hierarchical clustering was performed using pheatmap library in R. Row-value filtered FPKM  
1438 values were analyzed using default options. Heatmap colors indicate z-score in each row  
1439 (**Supplemental Fig. 22A**).  
1440

## 1441 Bioinformatics

1442  
1443 Drug response (as IC<sub>50</sub> per drug and cell line) and gene expression data (as log<sub>2</sub> transformed  
1444 RMA normalized basal expression or RNA-seq TPM expression per cell line) were derived  
1445 from GDSC (v2, accessed from [www.cancerRxgene.org](http://www.cancerRxgene.org)) and CCLE (v2, accessed from  
1446 [www.depmmap.org](http://www.depmmap.org)) projects. All IC<sub>50</sub>s are expressed in  $\mu\text{M}$ . Categorical grouping of cell lines  
1447 per cancer type was done and plotted in R (see code availability). Discretization threshold for  
1448 each drug (log IC<sub>50</sub>/cell line) was determined as described previously<sup>[30,68,69]</sup>. Cell lines without  
1449 corresponding drug or expression measurement were not included in the analysis. Drug  
1450 sensitivity data were evaluated using IC<sub>50</sub> values (including extrapolated values) for GDSC  
1451 and activity area for CCLE. Correlation analysis between drug response and gene expression  
1452 per cancer type were performed by quantitatively matching pre-processed values. All  
1453 Spearman's correlation coefficients, relative quantitation, and plotting were performed in  
1454 Python (see code availability). Only correlations with  $p<0.05$  are shown. Summary reference  
1455 on drug categories and target pathways is accessible in GDSC (available as Excel file  
1456 TableS1F.xlsx in their database). Mutation dataset were obtained from CCLE (v2, accessed  
1457 from [www.cbioportal.org](http://www.cbioportal.org)) and FUT domain information were searched in the Pfam database  
1458 ([www.pfam.xfam.org](http://www.pfam.xfam.org)). CTRP dataset was analyzed using the CARE algorithm

1459 ([www.care.dfci.harvard.edu](http://www.care.dfci.harvard.edu)).

1460

1461 CCS gene set (n=1,810) was obtained and filtered from UniProt as described previously<sup>[8]</sup>.  
1462 Glycosylation (N-/O-glycosylation) gene sets were obtained by conducting gene set analysis  
1463 using the GOs “glycosylation”, “protein N-linked glycosylation”, and “protein O-linked  
1464 glycosylation” from MSigDB. The GO “glycosylation” contains 22 annotated sub-GOs. These  
1465 gene sets were used in their complete form, and were not filtered. Both total and overlapping  
1466 glycosylation genes (n=264 or 19 for overall glycosylation, n=81 or 1 for N-linked, and n=193  
1467 or 18 for O-linked) with the CCS gene set were included in the analysis. For CCS, missing  
1468 values on FC<sub>2</sub> were removed and 0 was considered as missing value. *P* values were  
1469 calculated by two-sided Student’s *t*-test and adjusted ( $p_{adj}$ ) to control for FDR using Benjamini-  
1470 Hochberg procedure. Methylation data analysis was performed using the pre-processed  
1471 reduced representation bisulfite sequencing (RRBS) dataset from CCLE v2. Drug sensitivity  
1472 data were obtained from GDSC as mentioned above.

1473

1474 PON1 co-expressing genes were obtained from CCLE v2 based on RNA-seq RPKM mRNA  
1475 abundance data. Interaction rank was based on Spearman’s correlation and *p* value.  
1476 Quantitative analysis and plotting were done in Python (see code availability). Localization for  
1477 each gene-encoding protein were queried in the Human Protein Atlas ([www.proteinatlas.org](http://www.proteinatlas.org)).

1478

1479 N-glycosylation sites from the PON1 protein sequence were predicted using NetNGlyc  
1480 ([www.cbs.dtu.dk/services/NetNGlyc](http://www.cbs.dtu.dk/services/NetNGlyc)). Folded and charged regions within PON1 were  
1481 visualized with FoldIndex ([www.fold.weizmann.ac.il/fldbin/findex](http://www.fold.weizmann.ac.il/fldbin/findex)) and EMBOSS charge  
1482 prediction tool ([www.bioinformatics.nl/cgi-bin/emboss/charge](http://www.bioinformatics.nl/cgi-bin/emboss/charge)). Functional protein stability and  
1483 folding effects of specific amino acid substitutions were predicted using MutPred v2  
1484 ([www.mutpred.mutdb.org](http://www.mutpred.mutdb.org)) and I-Mutant v3 ([www.gpcr2.biocomp.unibo.it/cgi/predictors/I-](http://www.gpcr2.biocomp.unibo.it/cgi/predictors/I-Mutant3.0/I-Mutant3.0.cgi)  
1485 [Mutant3.0/I-Mutant3.0.cgi](http://www.gpcr2.biocomp.unibo.it/cgi/predictors/I-Mutant3.0/I-Mutant3.0.cgi)).

1486

1487 Cancer dependency profiles were obtained from the DepMap portal ([www.depmap.org/portal](http://www.depmap.org/portal))  
1488 RNAi screen dataset (CRISPR Avana Public 20Q2). Dependency scores across all cancer  
1489 types were grouped by lineage type as predefined by DepMap and were subsequently used  
1490 for correlation analysis with drug response for indicated targeted therapy obtained from GDSC  
1491 v2 (AUC values). Spearman’s correlation coefficients and linear regression-derived *p* values  
1492 were obtained from pre-computed associations in the DepMap portal. Lineages with less than  
1493 four cell lines for a specific gene inquiry were removed from the dataset. Raw essentiality  
1494 scores were derived from the Profiling Relative Inhibition Simultaneously in Mixtures (PRISM)  
1495 drug screen and Project Achilles gene dependency screen both from the Broad Institute.

1496

1497 For patient survival analysis (first progression or RFS), the data were queried in the KM plotter  
1498 ([www.kmplot.com/analysis](http://www.kmplot.com/analysis)) for lung cancer or pan-cancer. For co-occurrence gene analysis,  
1499 data from the breast cancer METABRIC cohort were used (accessed from the cBioPortal).  
1500 The co-occurring genes in patients with indicated fucosylation gene copy number amplification,  
1501 deep deletion, mRNA upregulation, or mRNA downregulation were stratified.

1502

## 1503 References

1504

- 1505 1. D. S. Krause, R. A. van Etten, Tyrosine kinases as targets for cancer therapy. *N. Engl. J. Med.*  
1506 353, 172-187 (2005).
- 1507 2. J. Baselga, Targeting tyrosine kinases in cancer: the second wave. *Science* 312, 1175-1178  
1508 (2006).
- 1509 3. J. J. Lin, A. T. Shaw, Resisting resistance: targeted therapies in lung cancer. *Trends Cancer* 2,  
1510 350-364 (2016).

- 1511 4. P. B. Chapman, A. Hauschild, C. Robert, J. B. Haanen, P. Ascierto, J. Larkin, R. Dummer, C.  
1512 Garbe, A. Testori, M. Maio, D. Hogg, P. Lorigan, C. Lebbe, T. Jouary, D. Schadendorf, A.  
1513 Ribas, S. J. O'Day, J. A. Sosman, J. M. Kirkwood, A. M. M. Eggermont, B. Dreno, K. Nolop, J.  
1514 Li, B. Nelson, J. Hou, R. J. Lee, K. T. Flaherty, G. A. McArthur, BRIM-3 Study Group,  
1515 Improved survival with vemurafenib in melanoma with BRAF V600E mutation. *N. Engl. J.*  
1516 *Med.* 364, 2507-2516 (2011).
- 1517 5. C. L. Arteaga, M. X. Sliwkowski, C. K. Osborne, E. A. Perez, F. Puglisi, L. Gianni, Treatment  
1518 of HER2-positive breast cancer: current status and future perspectives. *Nat. Rev. Clin. Oncol.*  
1519 9, 16-32 (2011).
- 1520 6. R. Salgia, P. Kulkarni, The genetic/non-genetic duality of drug 'resistance' in cancer. *Trends*  
1521 *Cancer* 4, 110-118 (2018).
- 1522 7. A. C. Obenauf, Y. Zou, A. L. Ji, S. Vanharanta, W. Shu, H. Shi, X. Kong, M. C. Bosenberg, T.  
1523 Wiesner, N. Rosen, R. S. Lo, J. Massagué, Therapy-induced tumour secretomes promote  
1524 resistance and tumour progression. *Nature* 520, 368-372 (2015).
- 1525 8. J. L. Robinson, A. Feizi, M. Uhlén, J. Nielsen, A systematic investigation of the malignant  
1526 functions and diagnostic potential of the cancer secretome. *Cell Rep.* 26, 2622-2635 (2019).
- 1527 9. S. M. Hanash, S. J. Pitteri, V. M. Faca, Mining the plasma proteome for cancer biomarkers.  
1528 *Nature* 452, 571-579 (2008).
- 1529 10. R. Kalluri, V. S. LeBleu, The biology, function, and biomedical applications of exosomes.  
1530 *Science* 367, eaau6977 (2020).
- 1531 11. G. P. Gupta, J. Massagué, Cancer metastasis: building a framework. *Cell* 127, 679-695  
1532 (2006).
- 1533 12. M. Uhlén, L. Fagerberg, B. M. Hallström, C. Lindskog, P. Oksvold, A. Mardinoglu, Å.  
1534 Sivertsson, C. Kampf, E. Sjöstedt, A. Asplund, I. Olsson, K. Edlund, E. Lundberg, S. Navani,  
1535 C. A. Szigartyo, J. Odeberg, D. Djureinovic, J. O. Takanen, S. Hober, T. Alm, P. Edqvist, H.  
1536 Berling, H. Tegel, J. Mulder, J. Rockberg, P. Nilsson, J. M. Schwenk, M. Hamsten, K. von  
1537 Feilitzen, M. Forsberg, L. Persson, F. Johansson, M. Zwahlen, G. von Heijne, J. Nielsen, F.  
1538 Pontén, Tissue-based map of the human proteome. *Science* 347, 1260419 (2015).
- 1539 13. C. K. Barlowe, E. A. Miller, Secretory protein biogenesis and traffic in the early secretory  
1540 pathway. *Genetics* 193, 383-410 (2013).
- 1541 14. E. C. Madden, A. M. Gorman, S. E. Logue, A. Samali, Tumour cell secretome in  
1542 chemoresistance and tumour recurrence. *Trends Cancer* 6, 489-505 (2020).
- 1543 15. J. M. Pitt, A. Marabelle, A. Eggermont, J. Soria, G. Kroemer, L. Zitvogel, Targeting the tumor  
1544 microenvironment: removing obstruction to anticancer immune responses and  
1545 immunotherapy. *Ann. Oncol.* 27, 1482-1492 (2016).
- 1546 16. R. G. Spiro, Protein glycosylation: nature, distribution, enzymatic formation, and disease  
1547 implications of glycopeptide bonds. *Glycobiology* 12, 43-56 (2002).
- 1548 17. C. Reily, T. J. Stewart, M. B. Renfrow, J. Novak, Glycosylation in health and disease. *Nat.*  
1549 *Rev. Nephrol.* 15, 346-366 (2019).
- 1550 18. X. Zhang, Y. Wang, Glycosylation quality control by the golgi structure. *J. Mol. Biol.* 428,  
1551 3183-3193 (2016).
- 1552 19. D. Wlodkowic, J. Skommer, D. McGuinness, C. Hillier, Z. Darzynkiewicz, ER-Golgi network– a  
1553 future target for anti-cancer therapy. *Leuk. Res.* 33, 1440-1447 (2009).
- 1554 20. R. G. Lichtenstein, G. A. Rabinovich, Glycobiology of cell death: when glycans and lectins  
1555 govern cell fate. *Cell Death Differ.* 20, 976-986 (2013).
- 1556 21. J. R. Cubillos-Ruiz, S. E. Bettigole, L. H. Glimcher, Tumorigenic and immunosuppressive  
1557 effects of endoplasmic reticulum stress in cancer. *Cell* 168, 692-706 (2017).
- 1558 22. A. F. Costa, D. Campos, C. A. Reis, C. Gomes, Targeting glycosylation: a new road for cancer  
1559 drug discovery. *Trends Cancer* S2405-8033, 30129-1 (2020).
- 1560 23. P. Pothukuchi, I. Agliarulo, D. Russo, R. Rizzo, F. Russo, S. Parashuraman, Translation of  
1561 genome to glycome: role of the Golgi apparatus. *FEBS Lett.* 593, 2390-2411 (2019).

- 1562 24. S. S. Pinho, C. A. Reis, Glycosylation in cancer: mechanisms and clinical implications. *Nat.*  
1563 *Rev. Cancer* 15, 540-555 (2015).
- 1564 25. G. Lauc, M. Pezer, I. Rudan, H. Campbell, Mechanisms of disease: The human N-glycome.  
1565 *Biochim. Biophys. Acta* 1860, 1574-1582 (2016).
- 1566 26. O. M. T. Pearce, Cancer glycan epitopes: biosynthesis, structure and function. *Glycobiology*  
1567 28, 670-696 (2018).
- 1568 27. A. Blanas, N. M. Sahasrabudhe, E. Rodríguez, Y. van Kooyk, S. J. van Vliet, Fucosylated  
1569 antigens in cancer: an alliance toward tumor progression, metastasis, and resistance to  
1570 chemotherapy. *Front. Oncol.* 8, 39 (2018).
- 1571 28. M. Schneider, E. Al-Shareffi, R. S. Haltiwanger, Biological functions of fucose in mammals.  
1572 *Glycobiology* 27, 601-618 (2017).
- 1573 29. T. S. Keeley, S. Yang, E. Lau, The diverse contributions of fucose linkages in cancer. *Cancers*  
1574 11, 1241 (2019).
- 1575 30. F. Iorio, T. A. Knijnenburg, D. J. Vis, G. R. Bignell, M. P. Menden, M. Schubert, N. Aben, E.  
1576 Gonçalves, S. Barthorpe, H. Lightfoot, T. Cokelaer, P. Greninger, E. van Dyk, H. Chang, H. de  
1577 Silva, H. Heyn, X. Deng, R. K. Egan, Q. Liu, T. Mironenko, X. Mitropoulos, L. Richardson, J.  
1578 Wang, T. Zhang, S. Moran, S. Sayols, M. Soleimani, D. Tamborero, N. Lopez-Bigas, P. Ross-  
1579 Macdonald, M. Esteller, N. S. Gray, D. A. Haber, M. R. Stratton, C. H. Benes, L. F. A.  
1580 Wessels, J. Saez-Rodriguez, U. McDermott, M. J. Garnett, A landscape of pharmacogenomic  
1581 interactions in cancer. *Cell* 166, 740-754 (2016).
- 1582 31. J. Barretina, G. Caponigro, N. Stransky, K. Venkatesan, A. A. Margolin, S. Kim, C. J. Wilson,  
1583 J. Lehár, G. V. Kryukov, D. Sonkin, A. Reddy, M. Liu, L. Murray, M. F. Berger, J. E. Monahan,  
1584 P. Morais, J. Meltzer, A. Korejwa, J. Jané-Valbuena, F. A. Mapa, J. Thibault, E. Bric-Furlong,  
1585 P. Raman, A. Shipway, I. H. Engels, J. Cheng, G. K. Yu, J. Yu, P. Aspesi Jr, M. de Silva, K.  
1586 Jagtap, M. D. Jones, L. Wang, C. Hatton, E. Palescandolo, S. Gupta, S. Mahan, C. Sougnez,  
1587 R. C. Onofrio, T. Liefeld, L. MacConaill, W. Winckler, M. Reich, N. Li, J. P. Mesirov, S. B.  
1588 Gabriel, G. Getz, K. Ardlie, V. Chan, V. E. Myer, B. L. Weber, J. Porter, M. Warmuth, P. Finan,  
1589 J. L. Harris, M. Meyerson, T. R. Golub, M. P. Morrissey, W. R. Sellers, R. Schlegel, L. A.  
1590 Garraway, The Cancer Cell Line Encyclopedia enables predictive modelling of anticancer  
1591 drug sensitivity. *Nature* 483, 603-607 (2012).
- 1592 32. Cancer Cell Line Encyclopedia Consortium; Genomics of Drug Sensitivity in Cancer  
1593 Consortium, Pharmacogenomic agreement between two cancer cell line data sets. *Nature* 528,  
1594 84-87 (2015).
- 1595 33. P. M. Haverty, E. Lin, J. Tan, Y. Yu, B. Lam, S. Lianoglou, R. M. Neve, S. Martin, J. Settleman,  
1596 R. L. Yauch, R. Bourgon, Reproducible pharmacogenomic profiling of cancer cell line panels.  
1597 *Nature* 533, 333-337 (2016).
- 1598 34. Q. Yang, R. Zhang, H. Cai, L. Wang, Revisiting the substrate specificity of mammalian  $\alpha$ 1,6-  
1599 fucosyltransferase reveals that it catalyzes core fucosylation of N-glycans lacking  $\alpha$ 1,3-arm  
1600 GlcNAc. *J. Biol. Chem.* 292, 14796-14803 (2017).
- 1601 35. P. Jiang, W. Lee, X. Li, C. Johnson, J. S. Liu, M. Brown, J. C. Aster, X. S. Liu, Genome-scale  
1602 signatures of gene interaction from compound screens predict clinical efficacy of targeted  
1603 cancer therapies. *Cell Syst.* 6, 343-354 (2018).
- 1604 36. R. Saldoval, E. Dempsey, M. Pérez-Garay, K. Mariño, J. A. Watson, A. Blanco-Fernández, W.  
1605 B. Struwe, D. J. Harvey, S. F. Madden, R. Peracaula, A. McCann, P. M. Rudd, 5-AZA-2'-  
1606 deoxycytidine induced demethylation influences N-glycosylation of secreted glycoproteins in  
1607 ovarian cancer. *Epigenetics* 6, 1362-1372 (2011).
- 1608 37. A. Wahl, S. Kasela, E. Carnero-Montoro, M. van Iterson, J. Štambuk, S. Sharma, E. van den  
1609 Akker, L. Klaric, E. Benedetti, G. Razdorov, I. Trbojević-Akmačić, F. Vučković, I. Ugrina,  
1610 Marian Beekman, J. Deelen, D. van Heemst, B. T. Heijmans, BIOS Consortium, M. Wührer,  
1611 R. Plomp, T. Keser, M. Šimurina, T. Pavić, I. Gudelj, J. Krištić, H. Grallert, S. Kunze, A. Peters,  
1612 J. T. Bell, T. D. Spector, L. Milani, P. E. Slagboom, G. Lauc, C. Gieger, IgG glycosylation and

- 1613 DNA methylation are interconnected with smoking. *Biochim. Biophys. Acta* 1862, 637-648  
1614 (2018).
- 1615 38. P. A. Jones, Functions of DNA methylation: islands, start sites, gene bodies and beyond. *Nat.*  
1616 *Rev. Genet.* 13, 484-492 (2012).
- 1617 39. T. Wang, S. Zheng, L. Liu, J. Voglmeir, Development of a colorimetric PNGase activity assay.  
1618 *Carbohydr. Res.* 472, 58-64 (2019).
- 1619 40. H. H. Freeze, C. Kranz, Endoglycosidase and glycoamidase release of N-linked glycans.  
1620 *Curr. Protoc. Protein Sci.* 12, 12.4 (2010).
- 1621 41. R. B. Trimble, A. L. Tarentino, Identification of distinct endoglycosidase (endo) activities in  
1622 *Flavobacterium meningosepticum*: endo F1, endo F2, and endo F3. Endo F1 and endo H  
1623 hydrolyze only high mannose and hybrid glycans. *J. Biol. Chem.* 266, 1646-1651 (1991).
- 1624 42. M. Collin, A. Olsén, EndoS, a novel secreted protein from *Streptococcus pyogenes* with  
1625 endoglycosidase activity on human IgG. *EMBO J.* 20, 3046-3055 (2001).
- 1626 43. J. J. Goodfellow, K. Baruah, K. Yamamoto, C. Bonomelli, B. Krishna, D. J. Harvey, M. Crispin,  
1627 C. N. Scanlan, B. G. Davis, An endoglycosidase with alternative glycan specificity allows  
1628 broadened glycoprotein remodelling. *J. Am. Chem. Soc.* 134, 8030-8033 (2012).
- 1629 44. A. Tsherniak, F. Vazquez, P. G. Montgomery, B. A. Weir, G. Kryukov, G. S. Cowley, S. Gill, W.  
1630 F. Harrington, S. Pantel, J. M. Krill-Burger, R. M. Meyers, L. Ali, A. Goodale, Y. Lee, G. Jiang,  
1631 J. Hsiao, W. F. J. Gerath, S. Howell, E. Merkel, M. Ghandi, L. A. Garraway, D. E. Root, T. R.  
1632 Golub, J. S. Boehm, W. C. Hahn, Defining a cancer dependency map. *Cell* 170, 564-576  
1633 (2017).
- 1634 45. C. V. Pecot, S. Y. Wu, S. Bellister, J. Filant, R. Rupaimoole, T. Hisamatsu, R. Bhattacharya, A.  
1635 Maharaj, S. Azam, C. Rodriguez-Aguayo, A. S. Nagaraja, M. P. Morelli, K. M. Gharpure, T. A.  
1636 Waugh, V. Gonzalez-Villasana, B. Zand, H. J. Dalton, S. Kopetz, G. Lopez-Berestein, L. M.  
1637 Ellis, A. K. Sood, Therapeutic silencing of KRAS using systemically delivered siRNAs. *Mol.*  
1638 *Cancer Ther.* 13, 2876-2885 (2014).
- 1639 46. K. Xu, D. Park, A. T. Magis, J. Zhang, W. Zhou, G. L. Sica, S. S. Ramalingam, W. J. Curran,  
1640 X. Deng, Small molecule KRAS agonist for mutant KRAS cancer therapy. *Mol. Cancer* 19, 93  
1641 (2020).
- 1642 47. J. Massagué, A. C. Obenauf, Metastatic colonization by circulating tumour cells. *Nature* 529,  
1643 298-306 (2016).
- 1644 48. M. LaMantia, T. Miura, H. Tachikawa, H. A. Kaplan, W. J. Lennarz, T. Mizunaga, Glycosylation  
1645 site binding protein and protein disulfide isomerase are identical and essential for cell viability  
1646 in yeast. *Proc. Natl. Acad. Sci. USA* 88, 4453-4457 (1991).
- 1647 49. J. Ahn, H. Sung, Y. Yoon, B. Kim, W. S. Yang, C. Lee, H. Park, B. Kim, B. Kim, S. Lee, H. An,  
1648 J. Cho, Integrated glycoproteomics demonstrates fucosylated serum paraoxonase 1  
1649 alterations in small cell lung cancer. *Mol. Cell. Proteomics* 13, 30-48 (2014).
- 1650 50. M. B. D. Aldonza, Y. S. Son, H. Sung, J. M. Ahn, Y. Choi, Y. Kim, S. Cho, J. Cho,  
1651 Paraoxonase-1 (PON1) induces metastatic potential and apoptosis escape via its  
1652 antioxidative function in lung cancer cells. *Oncotarget* 8, 42817-42835 (2017).
- 1653 51. M. Harel, A. Aharoni, L. Gaidukov, B. Brumshtein, O. Khersonsky, R. Meged, H. Dvir, R. B. G.  
1654 Ravelli, A. McCarthy, L. Toker, I. Silman, J. L. Sussman, D. S. Tawfik, Structure and evolution  
1655 of the serum paraoxonase family of detoxifying and anti-atherosclerotic enzymes. *Nat. Struct.*  
1656 *Mol. Biol.* 11, 412-419 (2004).
- 1657 52. D. I. Draganov, J. F. Teiber, A. Speelman, Y. Osawa, R. Sunahara, B. N. L. Du, Human  
1658 paraoxonases (PON1, PON2, and PON3) are lactonases with overlapping and distinct  
1659 substrate specificities. *J. Lipid Res.* 46, 1239-1247 (2005).
- 1660 53. M. R. M. Hussain, Z. Iqbal, W. M. Qazi, D. C. Hoessli, Charge and polarity preferences for N-  
1661 glycosylation: a genome-wide in silico study and its implications regarding constitutive  
1662 proliferation and adhesion of carcinoma cells. *Front. Oncol.* 8, 29 (2018).
- 1663 54. S. H. Shakin-Eshleman, S. L. Spitalnik, L. Kasturi, The amino acid at the X position of an Asn-  
1664 X-Ser sequon is an important determinant of N-linked core-glycosylation efficiency. *J. Biol.*

- 1665 Chem. 271, 6363-6366 (1996).
- 1666 55. A. García-García, L. Ceballos-Laita, S. Serna, R. Artschwager, N. C. Reichardt, F. Corzana, R.
- 1667 Hurtado-Guerrero, Structural basis for substrate specificity and catalysis of  $\alpha$ 1,6-
- 1668 fucosyltransferase. *Nat. Commun.* 11, 973 (2020).
- 1669 56. T. H. Tseng, T. W. Lin, C. Y. Chen, C. H. Chen, J. L. Lin, T. L. Hsu, C. H. Wong, Substrate -
- 1670 preference and interplay of fucosyltransferase 8 and N-acetylglucosaminyltransferases. *J. Am.*
- 1671 *Chem. Soc.* 139, 9431-9434 (2017).
- 1672 57. D. Ron, P. Walter, Signal integration in the endoplasmic reticulum unfolded protein response.
- 1673 *Nat. Rev. Mol. Cell Biol.* 8, 519-529 (2007).
- 1674 58. P. Agrawal, B. Fontanals-Cirera, E. Sokolova, S. Jacob, C. A. Vaiana, D. Argibay, V. Davalos,
- 1675 M. McDermott, S. Nayak, F. Darvishian, M. Castillo, B. Ueberheide, I. Osman, D. Fenyö, L. K.
- 1676 Mahal, E. Hernando, A systems biology approach identifies FUT8 as a driver of melanoma
- 1677 metastasis. *Cancer Cell* 31, 804-819 (2017).
- 1678 59. E. Lau, Y. Feng, G. Claps, M. N. Fukuda, A. Perlina, D. Donn, L. Jilaveanu, H. Kluger, H. H.
- 1679 Freeze, Z. A. Ronai, The transcription factor ATF2 promotes melanoma metastasis by
- 1680 suppressing protein fucosylation. *Sci. Signal.* 8, ra124 (2015).
- 1681 60. M. Aubert, L. Panicot, C. Crotte, P. Gibier, D. Lombardo, M. O. Sadoulet, E. Mas, Restoration
- 1682 of alpha(1,2) fucosyltransferase activity decreases adhesive and metastatic properties of
- 1683 human pancreatic cancer cells. *Cancer Res.* 60, 1449-1456 (2000).
- 1684 61. C. Sun, P. Chen, Q. Chen, L. Sun, X. Kang, X. Qin, Y. Liu, Serum paraoxonase 1 heteroplasmon,
- 1685 a fucosylated, and sialylated glycoprotein in distinguishing early hepatocellular carcinoma from
- 1686 liver cirrhosis patients. *Acta Biochim. Biophys. Sin.* 44, 765-773 (2012).
- 1687 62. S. Zhang, K. Jiang, Q. Zhang, K. Guo, Y. Liu, Serum fucosylated paraoxonase 1 as a
- 1688 potential glyco biomarker for clinical diagnosis of early hepatocellular carcinoma using ELISA
- 1689 Index. *Glycoconj. J.* 32, 119-125 (2015).
- 1690 63. C. Tu, M. Wu, Y. Lin, R. Kannagi, R. Yang, FUT8 promotes breast cancer cell invasiveness by
- 1691 remodeling TGF- $\beta$  receptor core fucosylation. *Breast Cancer Res.* 19, 111 (2017).
- 1692 64. B. W. Mallard, J. Tiralongo, Cancer stem cell marker glycosylation: nature, function and
- 1693 significance. *Glycoconj. J.* 34, 441-452 (2017).
- 1694 65. A. Bensadoun, D. Weinstein, Assay of proteins in the presence of interfering materials. *Anal.*
- 1695 *Biochem.* 70, 241-250 (1976).
- 1696 66. J. Cha, P. Kim, Time series assessment of the effects of hypoxic stress on glioma
- 1697 tumorsphere development within engineered microscale niches. *Biomaterials* 194, 171-182
- 1698 (2019).
- 1699 67. R. J. Boado, Y. Zhang, Y. Zhang, Y. Wang, W. M. Pardridge, IgG-paraoxonase-1 fusion
- 1700 protein for targeted drug delivery across the human blood-brain barrier. *Mol. Pharm.* 5, 1037-
- 1701 1043 (2008).
- 1702 68. M. B. D. Aldonza, J. Ku, J. Hong, D. Kim, S. J. Yu, M. Lee, M. C. Prayogo, S. Tan, D. Kim, J.
- 1703 Han, S. K. Lee, S. G. Im, H. S. Ryu, Y. Kim, Prior acquired resistance to paclitaxel relays
- 1704 diverse EGFR-targeted therapy persistence mechanisms. *Sci. Adv.* 6, eaav7416 (2020).
- 1705 69. M. B. D. Aldonza, R. D. Delos Reyes, Y. S. Kim, J. Ku, A. M. Barsallo, J. Y. Hong, S. K. Lee, H.
- 1706 S. Ryu, Y. Park, J. Y. Cho, Y. Kim, Chemotherapy confers a conserved secondary tolerance to
- 1707 EGFR inhibition via AXL-mediated signaling bypass. *Sci. Rep.* 11, 8016 (2021).
- 1708 70. C. Xu, S. Wang, G. Thibault, D. T. W. Ng, Futile protein folding cycles in the ER are
- 1709 terminated by the unfolded protein O-mannosylation pathway. *Science* 340, 978-981 (2013).
- 1710 71. E. T. Elkiran, N. Mar, B. Aygen, F. Gursu, A. Karaoglu, S. Koca, Serum paraoxonase and
- 1711 arylesterase activities in patients with lung cancer in a Turkish population. *BMC Cancer* 7, 48
- 1712 (2007).
- 1713 72. S. Tyanova, T. Temu, J. Cox, The MaxQuant computational platform for mass spectrometry-
- 1714 based shotgun proteomics. *Nat. Protoc.* 11, 2301-2319 (2016).
- 1715 73. D. Bach, D. Kim, S. Y. Bae, W. K. Kim, J. Hong, H. Lee, N. Rajasekaran, S. Kwon, Y. Fan, T.
- 1716 Luu, Y. K. Shin, J. Lee, S. K. Lee, Targeting nicotinamide N-methyltransferase and miR-449a



1717 in EGFR-TKI-resistant non-small-cell lung cancer cells. *Mol. Ther. Nucleic Acids* 11, 455-467  
1718 (2018).

1719 74. D. Kim, D. Bach, Y. Fan, T. Luu, J. Hong, H. J. Park, S. K. Lee, AXL degradation in  
1720 combination with EGFR-TKI can delay and overcome acquired resistance in human non-small  
1721 cell lung cancer cells. *Cell Death Dis.* 10, 361 (2019).

1722 75. D. Bach, T. Luu, D. Kim, Y. J. An, S. Park, H. J. Park, S. K. Lee, BMP4 upregulation is  
1723 associated with acquired drug resistance and fatty acid metabolism in EGFR-mutant non-  
1724 small-cell lung cancer cells. *Mol. Ther. Nucleic Acids* 12, 817-828 (2018).

1725  
1726  
1727  
1728

## Acknowledgment

1729 We thank the members of the Yoosik Kim and Je-Yoel Cho labs for support and feedback. We  
1730 are grateful to Thannaree Chottitupawong for establishing lapatinib- and PHA605752-  
1731 resistant cell lines; Jung-Mo Ahn for help with N-glycosylation peptide mapping; Stephanie Tan  
1732 and Monica Prayogo for support in secretome preparation; Sang Kook Lee for PC9- and  
1733 HCC827-derived cell lines; Eui-Cheol Shin, Eugene Cho, David Helfman, Seung-Jae Lee, Ki  
1734 Jun Jeong, and Jinyoung Kang for critical kits, reagents, antibodies, and plasmids; core FACS  
1735 and confocal microscopy facilities of Seoul National University College of Pharmacy, KAIST  
1736 Biological Sciences, and KAIST GSMSE for technical support. We also thank the glycobiology  
1737 Twitter (#glycotime) and Open Memeing Frame communities for open discussion and  
1738 experimental advice.

1739  
1740

## Funding

1741  
1742 This research was supported by the KAIST College of Engineering Global Initiative  
1743 Convergence Research (grant no. N11190234), the Basic Science Research Program (grant  
1744 nos. NRF-2019R1C1C1006672 and NRF-2018R1A6A3A01012494), the Bio & Medical  
1745 Technology Development Program (grant no. NRF-2016M3A9B6026771) through the National  
1746 Research Foundation (NRF) funded by the Korean government's Ministry of Science and ICT,  
1747 and the Korea Health Technology R&D Project through the Korea Health Industry  
1748 Development Institute (KHIDI), funded by the Korean government's Ministry of Health &  
1749 Welfare (grant no. HI14C1324). M.B.D.A. is supported by the Hyundai Motor Chung Mong-  
1750 Koo Foundation Global Scholarship (FHS-20-008).

1751  
1752  
1753

## Author contributions

1754 M.B.D.A. conceived the project, designed, performed, and analyzed most of the experiments,  
1755 and wrote the manuscript with Yoosik K.; J.C. and I.Y. established the tumor spheroid culture,  
1756 performed and analyzed live cell imaging experiments; J.K. analyzed RNA-seq data and  
1757 helped with data analysis; P.S. analyzed LC-MS/MS data; D. L., D. K., and M.B.D.A. performed  
1758 LC-MS/MS experiments; R.D.D.R. assisted in computational and data analysis using public  
1759 datasets; R.E.C., M.K., and Yongsuk K. generated stable RFP cells and assisted in  
1760 fucosylation experiments; H.J.S. and M.B.D.A. generated all PON1-modified cell lines and  
1761 established the LLC metastasis model; Soyeon K. and T.M.K. prepared patient serum samples  
1762 and established some resistant cell lines; G.P. assisted in RNA work; T.M.K., S.C., and H.S.R.  
1763 provided and curated all IRB-approved human cancer patient specimens; Yoosik K., J.Y.C.,  
1764 and P.K. supervised the project.

1765  
1766  
1767

## Competing interests

1768 Yoosik K., M.B.D.A., P.K., J.C., I.Y., and J.Y.C. have filed a patent for the biomarker signature  
1769 revealed in this study. J.Y.C. is CEO of ProtanBio Inc., a disease biomarker venture company

1770 of Seoul National University. H.J.S. was employed in the same company. The authors declare  
1771 that they have no other competing interests.

1772

### 1773 **Data and materials availability**

1774

1775 All sequencing data produced for this publication has been deposited to the NCBI Gene  
1776 Expression Omnibus (GEO) database under the accession number GSE160205. The mass  
1777 spectrometry proteomics data have been deposited to the ProteomeXchange Consortium via  
1778 the PRIDE partner repository with the dataset identifier PXD022240. Other data associated  
1779 with this study are present in the paper, Supplementary Materials, or source data files.  
1780 Additional data related to this paper may be requested from M.B.D.A., Yoosik K., or J.Y.C.  
1781 Reagents and cell lines described here are accessible through a materials transfer agreement.

1782

### 1783 **Code availability**

1784

1785 The main scripts used for data analyses and plotting are described in detail and are available  
1786 upon request from M.B.D.A. or from [https://github.com/borrisHUBO/Aldonza-et-al.-Nature-](https://github.com/borrisHUBO/Aldonza-et-al.-Nature-Communications)  
1787 [Communications](https://github.com/borrisHUBO/Aldonza-et-al.-Nature-Communications).

1788

### 1789 **Figure description**

1790

1791 **Fig. 1. Secretome fucosylation is a post-translational mechanism associated with**  
1792 **targeted therapy resistance in cancer.**

1793 (A) Heat-scatterplot visualization of correlation between indicated FUT gene expression and  
1794 drug response per cancer type screened in GDSC and CCLE. Per-sample estimates of area  
1795 under the fitted dose response curve were used as metric of drug response per cell line. Size  
1796 of circle refers to mean log<sub>2</sub> gene expression while color corresponds to Spearman's rank  
1797 coefficients. Only statistically significant correlations are shown ( $P < 0.05$ ). Beside are relative  
1798 mean proportion of mutational signatures of all FUT genes per cancer type queried in GDSC  
1799 and CCLE. FUT mutations were classified as "GDP-Fuc binding site mutations" if any  
1800 mutations (amino acid change) occurred near ( $\pm 5$  amino acid position) or at the annotated  
1801 GDP-Fuc binding sites. Domain information was queried in UniProt. Spearman's rank  
1802 coefficients (correlation between FUT expression and drug response) were calculated in cell  
1803 lines carrying these mutations as opposed to those that do not ("others").

1804 (B) Positive correlation between FUT8 gene expression and resistance to drugs grouped  
1805 accordingly per target process in GDSC. Data from both GDSC and CCLE are summarized.  
1806 Color represents Spearman's rank coefficients per target process. Only statistically significant  
1807 correlations are shown ( $P < 0.01$ ). Bars indicate number of drugs per class while size of circle  
1808 corresponds to relative Spearman's rank coefficients per drug. Beside is a proportion of drug  
1809 categories (GDSC classification) from all drugs with resistance profiles positively correlated  
1810 with FUT8 expression.

1811 (C) Heat-scatterplot visualization of differential (TCGA primary tumor versus paired normal)  
1812 CCS and overlapped glycosylation gene set expressions (including O-/N-linked glycosylation)  
1813 per cancer type. Size of circle refers to adjusted  $-\log_{10} p$  value while color corresponds to log<sub>2</sub>  
1814 fold change in expression. Statistically significant ( $P < 0.05$ ) Spearman's correlation between  
1815 drug sensitivity and CCS or glycosylation expression derived from GDSC are shown as  
1816 heatmap. In total, 169 drug profiles were queried; 33 are targeted and 10 are cytotoxic drugs.

1817 (D) Heat-scatterplot visualization of mean promoter methylation fraction 1 kb upstream of the  
1818 TSS of indicated FUT genes per cancer type from CCLE RRBS dataset. Size of circle refers  
1819 to number of screened cell lines while color corresponds to FUT promoter methylation. Only  
1820 statistically significant changes are shown ( $P < 0.05$ ). Correlation between drug sensitivity and  
1821 methylation are shown as heatmap as in C.

1822 (E) Schematic of secretome N-glycoprotein core fucosylation.

1823 (F) AAL blot analysis of total fucosylation in indicated crude patient sera prepared as in the left

1824 panel. Representative of two independent experiments. Equal loading controls and AAL  
1825 specificity are presented in Supplemental Fig. 4.

1826 (G) N-glycan release assay using indicated N-glycan-cleaving enzymes in crude patient sera  
1827 prepared as in F. Prior to this assay, samples were separated by SDS-PAGE followed by  
1828 Coomassie staining. 30~60 kDa in-gel proteins were then excised followed by exogenous de-  
1829 N-glycosylation (total 8U PNGase F or total 10U Endo S/F). Glycan cleavage site is shown for  
1830 each enzyme. Values indicate mean absorbance at 584 nm from three replicates.  
1831 Representative of two independent experiments. Sample size n, unique patient samples. For  
1832 statistical analysis, two-tailed Mann–Whitney *U* test was used. NS, not significant.

1833 (H) Preparation of cell secretomes and schematic of sandwich ELLA.

1834 (I) Characterization of fucosylation by sandwich ELLA in indicated secretomes from sensitive  
1835 cells or DR clones prepared as in H following treatment with or without indicated drugs for 48  
1836 h. Values are relative to DMSO (means  $\pm$  SD of three biological replicates). *P* values are  
1837 indicated as size of the corresponding circle; Student's *t*-test. NS, not significant.

1838 (J) N-glycan release assay using indicated N-glycan-cleaving enzymes in indicated  
1839 secretomes from sensitive cells or DR clones prepared as in H following treatment with or  
1840 without indicated drugs for 48 h. 30~60 kDa in-gel proteins were then excised followed by  
1841 exogenous de-N-glycosylation (total 8U PNGase F or total 10U Endo S/F). Glycan cleavage  
1842 site is shown for each enzyme. Values indicate mean absorbance at 584 nm from three  
1843 replicates. Representative of two independent experiments. For statistical analysis, two-tailed  
1844 Mann–Whitney *U* test was used. NS, not significant.

1845 (K) Representative confocal images of indicated DR clones stained for RCAS1 (golgi marker;  
1846 green), fluorescein-conjugated AAL (core fucosylation; red), and DAPI (nuclei; white). Co-  
1847 localization histogram plot of indicated line is shown. Representative of two independent  
1848 experiments.

1849 (L and M) AAL blot analysis of total fucosylation in indicated secretomes from sensitive or  
1850 resistant cells following treatment with or without indicated drugs for 48 h. Samples were  
1851 prepared as in H. Representative of two independent experiments. Equal loading controls and  
1852 AAL specificity are presented in Supplemental Fig. 4.

1853 (N) Characterization of fucosylation by sandwich ELLA in indicated secretomes from sensitive  
1854 cells or DR clones following treatment with or without respective drug IC50s for 48 h; or sera  
1855 from patients treated with or without osimertinib. Cell secretomes were prepared as in H while  
1856 patient sera were prepared as in F; except filtered according to their indicated nominal  
1857 molecular weight limit (NMWL). Values are relative to unfiltered secretome/sera (means  $\pm$  SD  
1858 of three biological replicates). *P* values are indicated as size of the corresponding circle;  
1859 Student's *t*-test. NS, not significant.

1860

1861 **Fig. 2. Secretome fucosylation promotes resistance rebound in regressing cell**  
1862 **admixture.**

1863 (A) Schematic of multi-color cell tracker assay in 'one pot' admixture culture.

1864 (B) Representative live-imaging confocal images of indicated 3D tumor spheroid admixture  
1865 prepared as in A and treated with or without 2  $\mu$ M gefitinib for 24 h. Scale bar indicates 100-  
1866  $\mu$ m. Mean intensity profiles of both fluorescently-tagged cells are shown. See also  
1867 Supplemental Movies 1, 2 and 3.

1868 (C) Representative Coomassie stained SDS-PAGE gels showing fucosylated secretome  
1869 proteins from indicated 3D cell admixtures prepared as in A, treated with 2  $\mu$ M gefitinib or 0.1  
1870  $\mu$ M erlotinib for 1 or 5 day/s, and incubated with or without 10  $\mu$ g/mL recombinant PNGase F.  
1871 Secretomes were concentrated using a >3 kDa NMWL filter. Representative of two  
1872 independent experiments.

1873 (D) Characterization of fucosylation by sandwich ELLA in indicated cell admixture secretomes  
1874 with conditions as in C. Values are relative to non-treated secretome (means  $\pm$  SD of three  
1875 biological replicates). \*\*\**P*<0.001, Student's *t*-test.

1876 (E) Characterization of fucosylation by AAL blotting, sandwich ELLA, and N-glycan release  
1877 assay in indicated 2D cell admixtures prepared as in A, treated with or without 1  $\mu$ M gefitinib

1878 or 0.1  $\mu\text{M}$  erlotinib, and incubated with or without 10  $\mu\text{g}/\text{mL}$  recombinant PNGase F for up to  
1879 5 days. Secretomes were concentrated using a  $>30$  kDa NMWL filter. Blots are representative  
1880 of two independent experiments. Values are relative to day 0 (means  $\pm$  SD of two biological  
1881 replicates).  $**P<0.01$ , Student's *t*-test.  
1882 (F) Representative confocal images of fluorescently-tagged GR clone in 3D cell admixtures  
1883 prepared as in A, treated with 2  $\mu\text{M}$  gefitinib, and incubated with or without 10  $\mu\text{g}/\text{mL}$   
1884 recombinant PNGase F for 24 or 48 h. Scale bar indicates 100- $\mu\text{m}$ . Intensity profiles of tracker-  
1885 tagged GR clone are shown. Values are relative to day 0 (means  $\pm$  SD of three biological  
1886 replicates).  $***P<0.001$ , Student's *t*-test. NS, not significant.  
1887 (G) Tracking of both fluorescently-tagged cells in 2D cell admixtures prepared as in A, treated  
1888 with or without 1  $\mu\text{M}$  gefitinib, and incubated with or without 10  $\mu\text{g}/\text{mL}$  recombinant PNGase F  
1889 for indicated times. Values are relative to day 0 (means  $\pm$  SD of three biological replicates).  
1890 Beside shows cell cycle states of adherent cells and apoptosis of floating cells in indicated cell  
1891 admixtures with same conditions at day 5. Cell cycle assays are representative of two  
1892 independent experiments.  $**P<0.01$ ,  $***P<0.001$ , two-tailed Mann–Whitney *U* test. NS, not  
1893 significant.  
1894 (H) Similar tracking experiments as in G, except upon FUT8 or SLC35C1 RNAi in sensitive  
1895 cells for 48 h prior to admixing and culture for 5 days. H1993 admixture was treated with or  
1896 without 1  $\mu\text{M}$  gefitinib, PC9 admixture was treated with or without 0.1  $\mu\text{M}$  erlotinib, and A375  
1897 admixture was treated with or without 0.1  $\mu\text{M}$  vemurafenib. Values are relative to day 0 (means  
1898  $\pm$  SD of two biological replicates).  $**P<0.01$ ,  $***P<0.001$ , two-tailed Mann–Whitney *U* test. NS,  
1899 not significant. PNGase F controls are presented in Supplemental Fig. 14E.  
1900 (I) Characterization of fucosylation by sandwich ELLA in indicated apoptotic debris and  
1901 secretomes from the same cell admixtures as in G. Values are relative to control apoptotic  
1902 debris (means  $\pm$  SD of three biological replicates).  $***P<0.001$ , Student's *t*-test. NS, not  
1903 significant.  
1904 (J) Phospho-RTK array of indicated cell admixtures in the same conditions as in G. The blots  
1905 reflect the phosphorylation status of 49 RTKs. Each RTK is spotted in duplicate, and the three  
1906 pairs of dots in each corner are positive or negative controls. Representative of two  
1907 independent experiments.  
1908 (K) Schematic of CM co-culture.  
1909 (L) Colony formation of indicated DR clones prepared as in K. Representative of two  
1910 independent experiments.  
1911 (M) ELISA sandwich-based measurement of indicated RTK phosphorylation in indicated DR  
1912 clones prepared as in K. Values are relative to DMSO (means  $\pm$  SD of three biological  
1913 replicates).  $**P<0.01$ ,  $***P<0.001$ , Student's *t*-test.  
1914 (N) qPCR analysis of indicated gene expression in 3D cell admixtures prepared as in A, treated  
1915 with or without 2  $\mu\text{M}$  gefitinib, and incubated with or without 10  $\mu\text{g}/\text{mL}$  recombinant PNGase F  
1916 for 5 days. Values are relative to DMSO and were normalized to GAPDH levels (means  $\pm$  SD  
1917 of three biological replicates). *P* values are indicated as size of the corresponding circle;  
1918 Student's *t*-test. NS, not significant.

1919  
1920 **Fig. 3. Identification of fucosylated PON1 as a critical component of therapy-induced**  
1921 **cancer secretomes.**

1922 (A) Schematic of label-free secretome analysis workflow.  
1923 (B) GO enrichment analysis for overrepresented BPs in cell-specific secretomes. Fold  
1924 enrichment is shown as heatmap.  $-\log_{10} p$  values (red), false discovery rates (green), and  
1925 number of gene components per BP (gray) are displayed. Results were analyzed from two  
1926 biological replicates.  
1927 (C) Protein candidate screening approach and  $\log_{10}$  LFQ intensities (relative protein  
1928 abundances) of indicated overlapped proteins in secretomes of both gefitinib-treated H1993  
1929 cells and GR clone. Top 11 protein hits with MWs between 30 and 70 kDa are shown. Results  
1930 were analyzed from two biological replicates.  
1931 (D) Immunoblot and AAL blot analyses of PON1 expression and fucosylation status in PON1

1932 immunoprecipitates from 1  $\mu$ M gefitinib-treated H1993 secretomes. Secretomes were  
1933 exogenously treated with or without 8U PNGase F. Bottom panel shows glycoprotein stained  
1934 SDS-PAGE gel of the same PON1 immunoprecipitates. Representative of two independent  
1935 experiments.  
1936 (E) Schematic of HLE for detecting PON1 fucosylation.  
1937 (F) HLE analysis of PON1 fucosylation in secretomes from indicated cells and DR clones  
1938 treated with or without indicated drug concentrations for 48 h. Values are relative to DMSO or  
1939 parental (means  $\pm$  SD of three biological replicates). *P* values are indicated as size of the  
1940 corresponding circle; Student's *t*-test. NS, not significant.  
1941 (G) Immunoblot analysis of PON1 expression in indicated crude patient sera exogenously  
1942 treated with or without 8U PNGase F. Secretomes were either flow-through or enriched in AAL  
1943 columns. Representative of two independent experiments.  
1944 (H) AAL blot analysis of PON1 fucosylation in PON1 immunoprecipitates from indicated patient  
1945 sera. Representative of two independent experiments.  
1946 (I) HLE analysis of PON1 fucosylation in indicated crude patient sera. Values indicate mean  
1947 absorbance at 450 nm from three replicates. Representative of two independent experiments.  
1948 Beside shows quantification of paraoxonase activity in the same crude patient sera. Values  
1949 indicate mean fluorescence units at 412 nm from three replicates. Representative of two  
1950 independent experiments. ROC curves for both PON1 fucosylation and paraoxonase activity  
1951 are shown. For statistical analysis, nonparametric Kruskal-Wallis test was used.  
1952 (J) Representative confocal images of indicated DR clones stained for RCAS1 (golgi marker;  
1953 green), PON1 (red), and DAPI (nuclei; white). Co-localization histogram plot of indicated line  
1954 is shown. Representative of two independent experiments.  
1955 (K) AAL blot analysis of PON1 fucosylation in PON1 immunoprecipitates from indicated  
1956 subcellular fractionated H1993-GR. Middle panel shows glycoprotein stained SDS-PAGE gel  
1957 of subcellular fractionated cell lysates. Bottom panel shows immune blot analysis of RCAS1  
1958 in the same cell lysates. Representative of two independent experiments.  
1959 (L) HLE analysis of PON1 fucosylation in indicated subcellular fractionated DR clone lysates  
1960 upon SLC35C1 RNAi for 48 h. Values indicate absorbance at 450 nm (means  $\pm$  SD of three  
1961 biological replicates). \*\*\**P*<0.001, Student's *t*-test. NS, not significant.  
1962 (M) Representative confocal images of H1993-GR upon SLC35C1 RNAi for 48 h. GR clones  
1963 were stained for SLC35C1 (white) and DAPI (nuclei; blue).  
1964 (N) Genes co-expression network of PON1 queried in the CCLE. All nodes represent  
1965 statistically significant co-expression with a gene. Top 20 PON1 co-expressing genes are  
1966 highlighted. Colored nodes indicate cellular localization of protein-coding genes queried in The  
1967 Human Protein Atlas.  
1968 (O) Representative confocal images of indicated DR clones stained for PON1 (red), PON3  
1969 (green), and DAPI (nuclei; white). Co-localization histogram plot of indicated line is shown.  
1970 (P) HLE analysis of PON1 fucosylation and quantification of paraoxonase activity in Golgi/ER  
1971 fractionated H1993-GR lysates upon SLC35C1, PON1, or PON3 RNAi for 48 h. Values are  
1972 relative to siControl (means  $\pm$  SD of three biological replicates). \*\*\**P*<0.001, Student's *t*-test.  
1973 NS, not significant.  
1974 (Q) GDP-Fuc activity analysis of FUT8 in cross-linked FUT8 and PON1 co-immunoprecipitates  
1975 from Golgi/ER fractionated H1993-GR lysates. Values indicate luminescence units and are  
1976 relative to control reaction (means  $\pm$  SD of three biological replicates). \**P*<0.05, \*\*\**P*<0.001,  
1977 two-tailed Mann-Whitney *U* test.

1978  
1979 **Fig. 4. Core fucosylation impacts PON1 folding and stability prior to secretion in**  
1980 **therapy-resistant cancer cells.**

1981 (A) Hypothetical model of N-glycosylation control of PON1 stability.  
1982 (B) Full-length PON1 N-glycosylation site prediction using NetNGlyc 1.0, folding prediction  
1983 using FoldIndex, and charge prediction using EMBOSS. >0.5 threshold score means  
1984 significant glycosylation potential. Unfolded regions are depicted in red, folded regions in  
1985 green. Positive charged is marked in red shades, negative charge in blue, and neutral charge

1986 in white.  
1987 (C) Conservation of indicated PON1 sequons throughout species.  
1988 (D) Closed conformation surface structure of PON1 (PDB ID: 1V04) highlighting arylesterase  
1989 domain and predicted N-glycosylation sites and sequons. 3D surface view was visualized  
1990 using PyMOL.  
1991 (E) N-glycan structural analysis of PON1 from our previous tandem MS/MS dataset. The m/z  
1992 1,647.62 [(M+Na)+corresponding to GlcNAc2Man3+HexNAc2Hex1Fuc1] is the base peak  
1993 (not visualized). Putative structure visualization of indicated monosaccharides and FUT8  
1994 substrate specificity were based on CID data and known glycobiology.  
1995 (F) Prediction of PON1 stability, structural and functional properties upon indicated in silico  
1996 N→G substitution at specific sequons using MutPred 2.0 and I-Mutant 3.0. Two N→G  
1997 substituted sequons (N253G and N324G) with statistically significant potential of loss of N-  
1998 glycosylation were chosen for validation experiments.  
1999 (G) AAL blot analysis of PON1 immunoprecipitates from H1993-GR upon transfection with  
2000 indicated full-length PON1, PON1-N253G, or PON1-N324G constructs for 36 h.  
2001 Representative of two independent experiments. Beside shows HLE analysis of secretome  
2002 PON1 fucosylation and N-glycan release assay in AAL-enriched PON1 immunoprecipitates  
2003 from H1993-GR upon similar transfection. Values are relative to full-length PON1 (means ±  
2004 SD of three biological replicates). \*\*\* $P < 0.001$ , Student's *t*-test.  
2005 (H) GDP-Fuc activity analysis of FUT8 in cross-linked FUT8 and PON1 co-immunoprecipitates  
2006 from H1993-GR upon transfection with constructs as in G. Values indicate luminescence units  
2007 and are relative to control reaction (means ± SD of three biological replicates). \*\* $P < 0.01$ ,  
2008 \*\*\* $P < 0.001$ , two-tailed Mann–Whitney *U* test.  
2009 (I) Immunoblot analysis of PON1 expression in H1993-GR upon transfection with constructs  
2010 as in G. Lysates were exogenously treated with or without indicated trypsin concentration.  
2011 Representative of two independent experiments.  
2012 (J) ELISA analysis of PON1 expression in H1993-GR upon transfection with constructs as in  
2013 G. Golgi/ER fractionated cell lysates were exogenously treated with or without indicated  
2014 trypsin concentrations. Values are relative to no treatment (means ± SD of three biological  
2015 replicates). \* $P < 0.05$ , \*\* $P < 0.01$ , \*\*\* $P < 0.001$ , Student's *t*-test. NS, not significant.  
2016 (K) EZClick labeling analysis of polypeptide synthesis in H1993-GR upon transfection with  
2017 constructs as in G and treated with or without 25 µg/mL CHX concentrations for indicated  
2018 times. Values indicate raw fluorescence units (means ± SD of two biological replicates). For  
2019 statistical analysis, Student's *t*-test was used. NS, not significant.  
2020 (L) Immunoblot analysis of PON1 expression in H1993-GR upon transfection with constructs  
2021 as in G and treated with or without 25 µg/mL CHX for indicated times. GAPDH was used as a  
2022 loading control. Blot intensity quantification of the lower PON1 kDa isoform is shown.  
2023 Representative of two independent experiments.  
2024 (M) ELISA analysis of secretome PON1 expression in H1993-GR upon transfection with  
2025 constructs as in G. Values are relative to full-length (means ± SD of three biological replicates).  
2026 \* $P < 0.05$ , \*\*\* $P < 0.001$ , Student's *t*-test.  
2027

2028 **Fig. 5. Secretome PON1 fucosylation promotes resistance via neutralization of**  
2029 **inflammatory response and ROS.**

2030 (A) Signal 45-pathway array of reporter transcriptional activities in indicated cell admixtures  
2031 treated with 1 µM gefitinib and incubated with or without 10 µg/mL recombinant PNGase F for  
2032 5 days. Log<sub>2</sub> values were normalized by control condition and represented as fold changes in  
2033 luciferase units (means ± SD of two biological replicates). Highlighted top up-/down-regulated  
2034 hits are all statistically significant ( $P < 0.001$ , Dunnett's test).  
2035 (B) qPCR analysis of indicated gene expression in 3D cell admixtures with same conditions  
2036 as in A, except treated with 2 µM gefitinib for 2 or 5 days. Values are relative to day 0 control  
2037 and were normalized to GAPDH levels (means ± SD of three biological replicates). *P* values  
2038 are indicated as size of the corresponding circle; Student's *t*-test. NS, not significant.  
2039 (C) qPCR analysis of indicated gene expression in 3D cell admixtures with same conditions

2040 as in B upon transfection with full-length PON1 or PON1-N253G construct for 36 h. Values are  
2041 relative to full-length and were normalized to GAPDH levels (means  $\pm$  SD of three biological  
2042 replicates). *P* values are indicated as size of the corresponding circle; Student's *t*-test. NS, not  
2043 significant.  
2044 (D) Representative confocal images of H1993-GR grown for 5 days in indicated secretomes  
2045 from 1  $\mu$ M gefitinib-treated H1993 cells exogenously treated with total 8U PNGase F or  
2046 transfected with full-length PON1 or PON1-N253G construct for 36 h. GR clones were stained  
2047 for fluorescein-conjugated AAL (core fucosylation; green), ATF6 (red), and DAPI (nuclei; blue).  
2048 Beside shows ELISA analysis of ATF6 expression in Golgi/ER fractionated H1993-GR with the  
2049 same conditions. Values are relative to full-length (means  $\pm$  SD of three biological replicates).  
2050  $**P < 0.01$ ,  $***P < 0.001$ , Student's *t*-test.  
2051 (E) ROS/RNS detection in secretomes from 1  $\mu$ M gefitinib-treated cell admixtures as in A or  
2052 C. Values are relative to day 0 or full-length (means  $\pm$  SD of two biological replicates).  $**P < 0.01$ ,  
2053  $***P < 0.001$ , Student's *t*-test. NS, not significant.  
2054 (F) Intracellular ROS/RNS detection in H1993-GR upon ATF6 RNAi for 48 h and grown in  
2055 secretomes from PON1-N253G-transfected H1993 cells treated with or without 1  $\mu$ M gefitinib  
2056 for 72 h. Values are relative to DMSO siControl (means  $\pm$  SD of two biological replicates).  
2057  $***P < 0.001$ , Student's *t*-test. NS, not significant.  
2058 (G) Schematic of sequentially layered admixture.  
2059 (H) Tracking of RFP-tagged H1993-GR upon ATF6 RNAi in 3D cell admixtures as in G.  
2060 Sensitive cells were transfected with full-length PON1 or PON1-N253G for 36 h. Values are  
2061 relative to day 0 (means  $\pm$  SD of two biological replicates).  $*P < 0.05$ ,  $**P < 0.01$ ,  $***P < 0.001$ ,  
2062 two-tailed Mann–Whitney *U* test. NS, not significant.  
2063 (I) Sandwich ELISA analysis of indicated cytokines in secretomes from cell admixtures  
2064 prepared as in D, except in 2D. Values are relative to siControl full-length (means  $\pm$  SD of two  
2065 biological replicates).  $*P < 0.05$ ,  $***P < 0.001$ , Student's *t*-test. NS, not significant.  
2066 (J) Modified secretomes from PON1-edited cells with varying PON1 fucosylation.  
2067 (K) ROS/RNS detection in secretomes described as in J. Values are relative to control (means  
2068  $\pm$  SD of three biological replicates).  $*P < 0.05$ ,  $**P < 0.01$ ,  $***P < 0.001$ , Student's *t*-test.  
2069 (L) Sandwich ELISA analysis of indicated cytokines in secretomes described as in J. Values  
2070 are relative to control/shControl (means  $\pm$  SD of two biological replicates).  $*P < 0.05$ ,  $**P < 0.01$ ,  
2071  $***P < 0.001$ , Student's *t*-test. NS, not significant.  
2072 (M) Tracking of RFP-tagged H1993-GR in 3D cell admixtures described in the schematic.  
2073 Admixtures were grown in secretomes described as in J. Values are relative to day 0 (means  
2074  $\pm$  SD of two biological replicates).  $*P < 0.05$ ,  $**P < 0.01$ ,  $***P < 0.001$ , two-tailed Mann–Whitney  
2075 *U* test. NS, not significant.  
2076 (N) Caspase activity analysis in 3D cell admixtures as in M and grown in secretomes described  
2077 as in J for 5 days. Values are relative to control/shControl (means  $\pm$  SD of two biological  
2078 replicates).  $***P < 0.001$ , Student's *t*-test.

2079  
2080 **Fig. 6. Transcriptome-wide analysis reveals modulator genes associated with**  
2081 **secretome PON1 fucosylation-induced therapy resistance.**

2082 (A) Schematic of co-culture conditions and preparation of transcript library from H1993-GR for  
2083 RNA-seq.

2084 (B) GO analysis of gene expression changes in H1993-GR grown in indicated conditions  
2085 showing enriched GO terms. Size of circle indicates frequency of the GO term in the underlying  
2086 GOA database while color indicates adjusted  $-\log_{10} p$  value. Highly similar GO terms are  
2087 linked by edges in the graph, where the line width indicates the degree of similarity.

2088 (C) Volcano plots showing differentially expressed genes deregulated by indicated conditions.  
2089 Significantly up-regulated genes are in red, while down-regulated genes in blue.

2090 (D) Venn diagram indicating overlap of up-regulated or down-regulated genes in indicated  
2091 conditions.

2092 (E) Log<sub>2</sub> fold changes and  $-\log_{10} p$  values of indicated top 20 overlapped up-regulated or  
2093 down-regulated genes in indicated conditions as in D. Data are means. *P* values were

2094 calculated using a two-tailed Mann–Whitney U test.  
2095 **(F)** Violin plots depicting dependency scores of indicated top differentially expressed genes  
2096 from two conditions as in D. Scores reflect data from 23 different cancer lineages. Central lines  
2097 indicate median. Data was obtained from DepMap RNAi screen. Beside shows heat-  
2098 scatterplot visualization of correlation between indicated pan-cancer gene dependency and  
2099 drug response screened in GDSC. Size of circle refers to linear regression  $p$  value while color  
2100 corresponds to Spearman's rank coefficients.  
2101 **(G)** Kaplan-Meier plots of FP or RFS in multiple lung cancer patient cohorts. Patient survival  
2102 data were stratified by indicated gene expression (low or high) in their primary tumors based  
2103 on microarray (FP) or RNA-seq (RFS) data.  $P$  values were calculated using a log-rank test.



**Figure 1.**

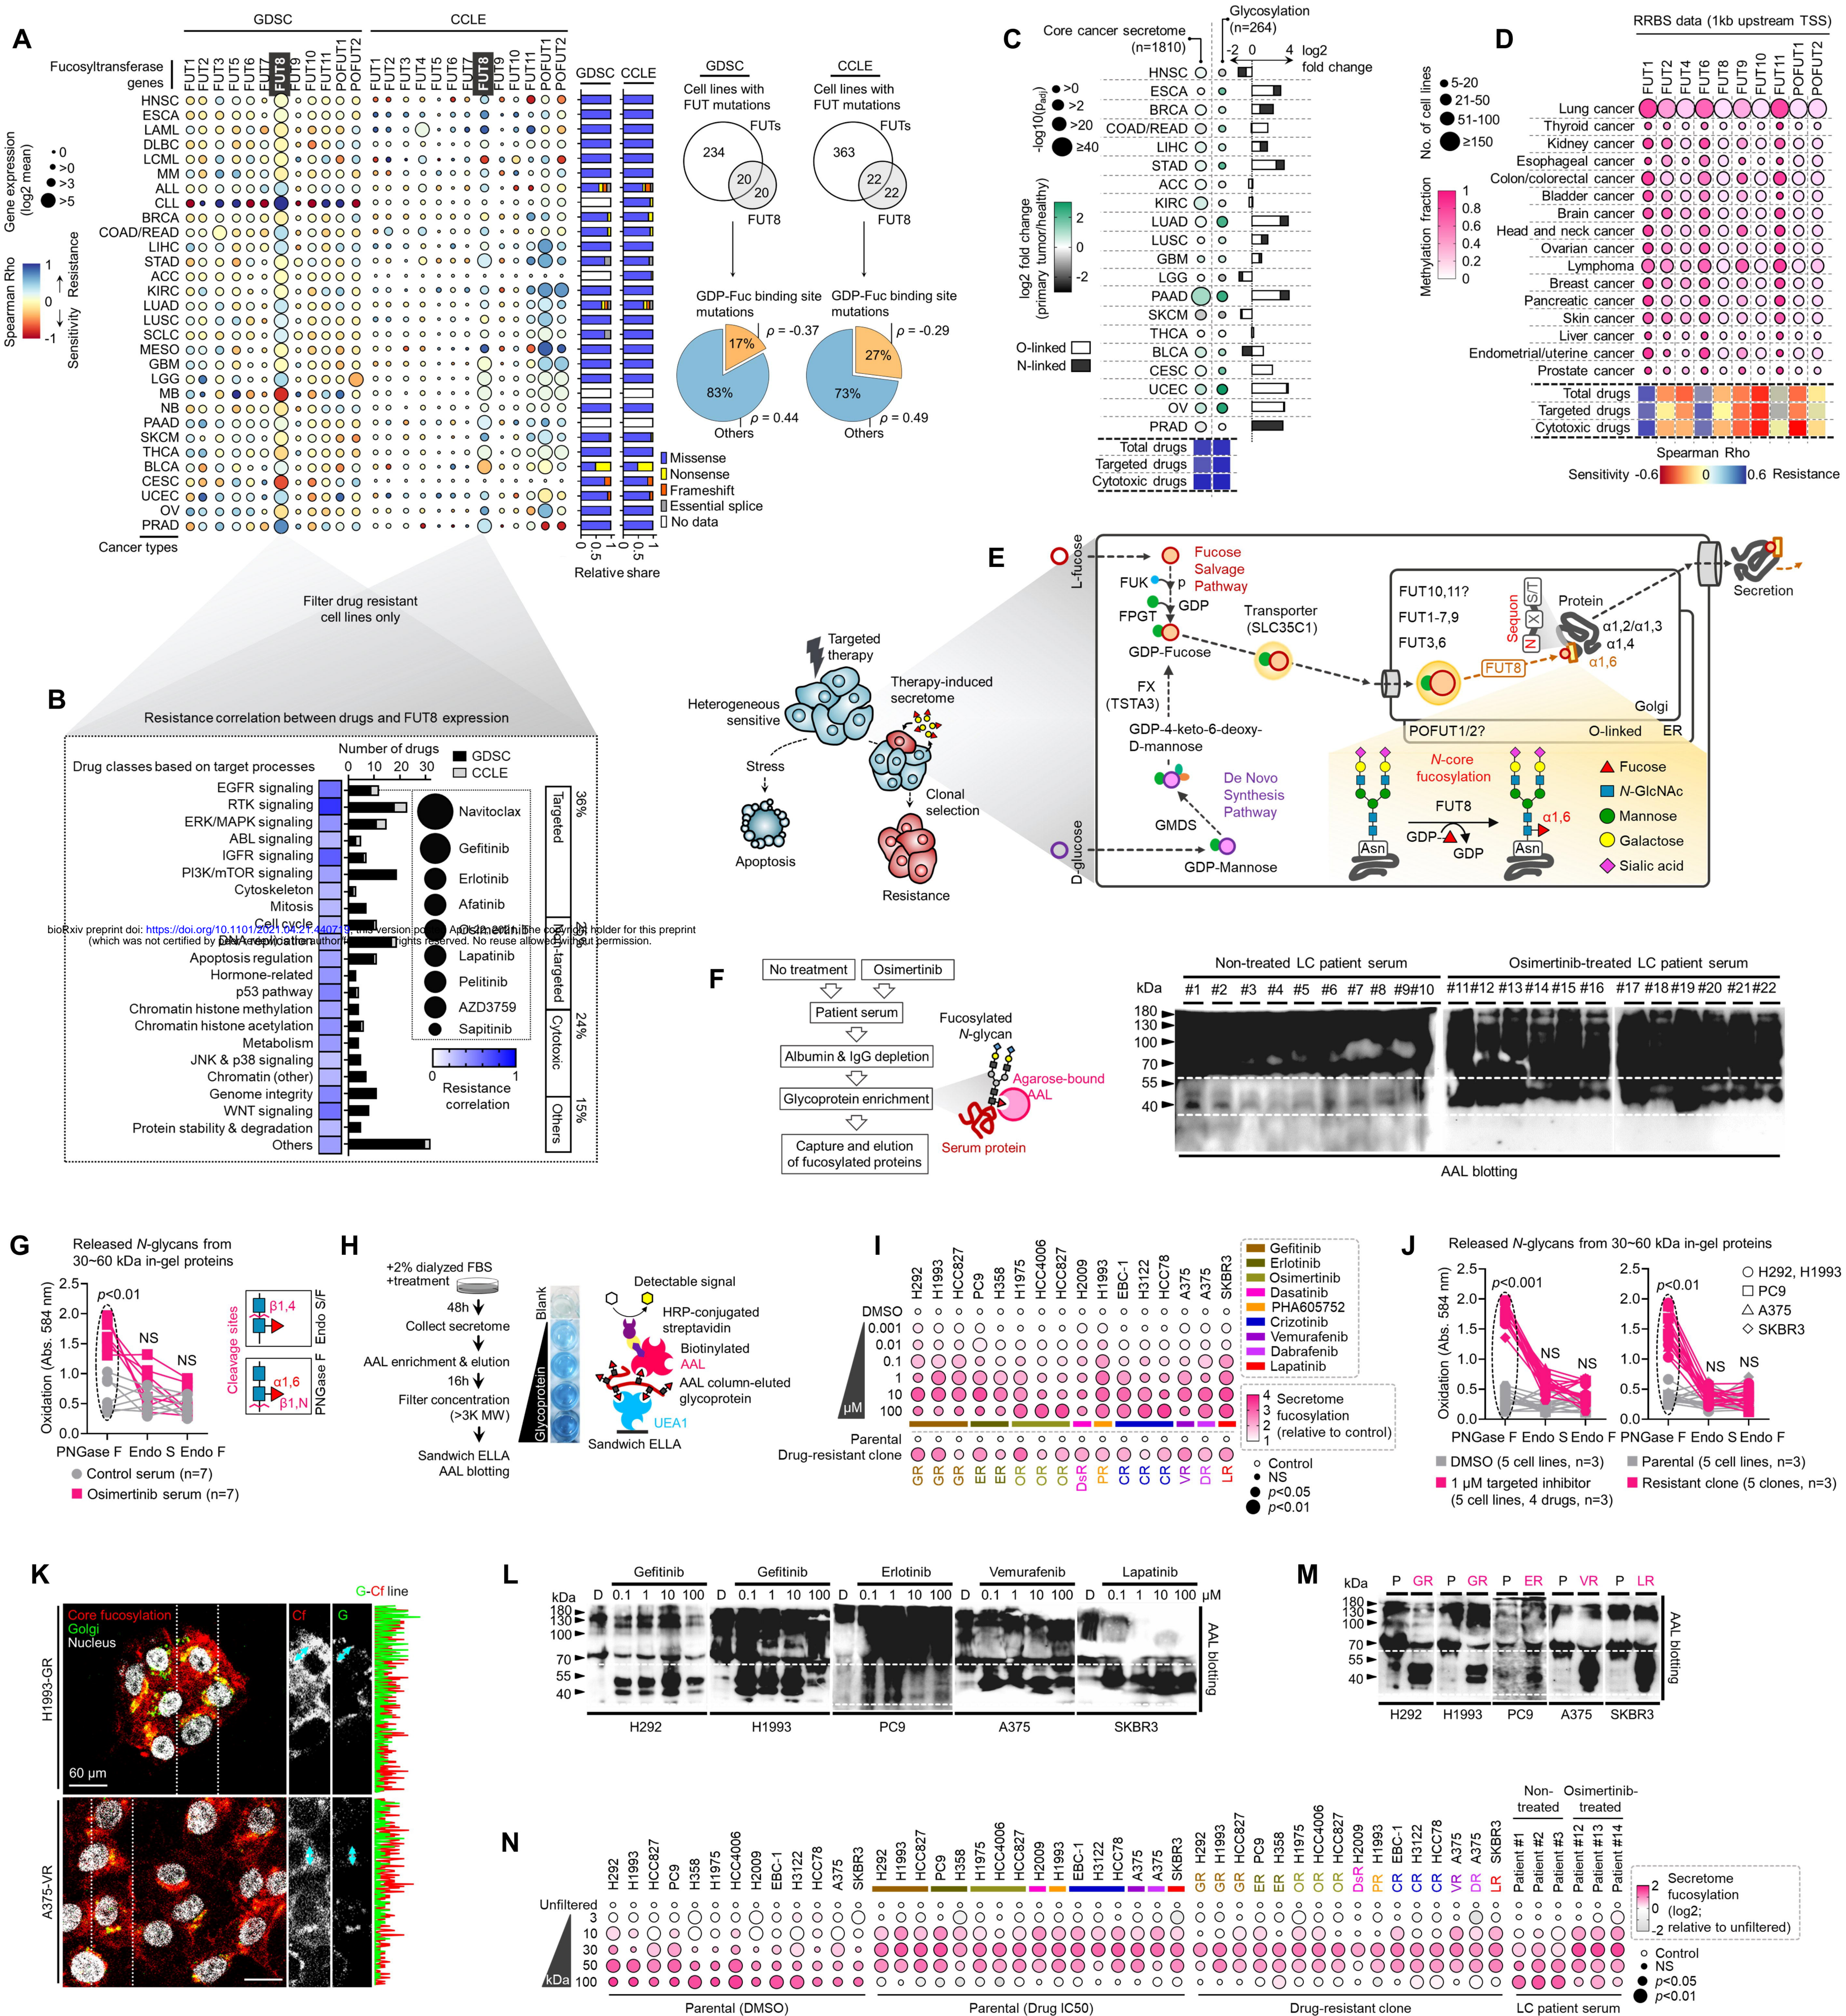

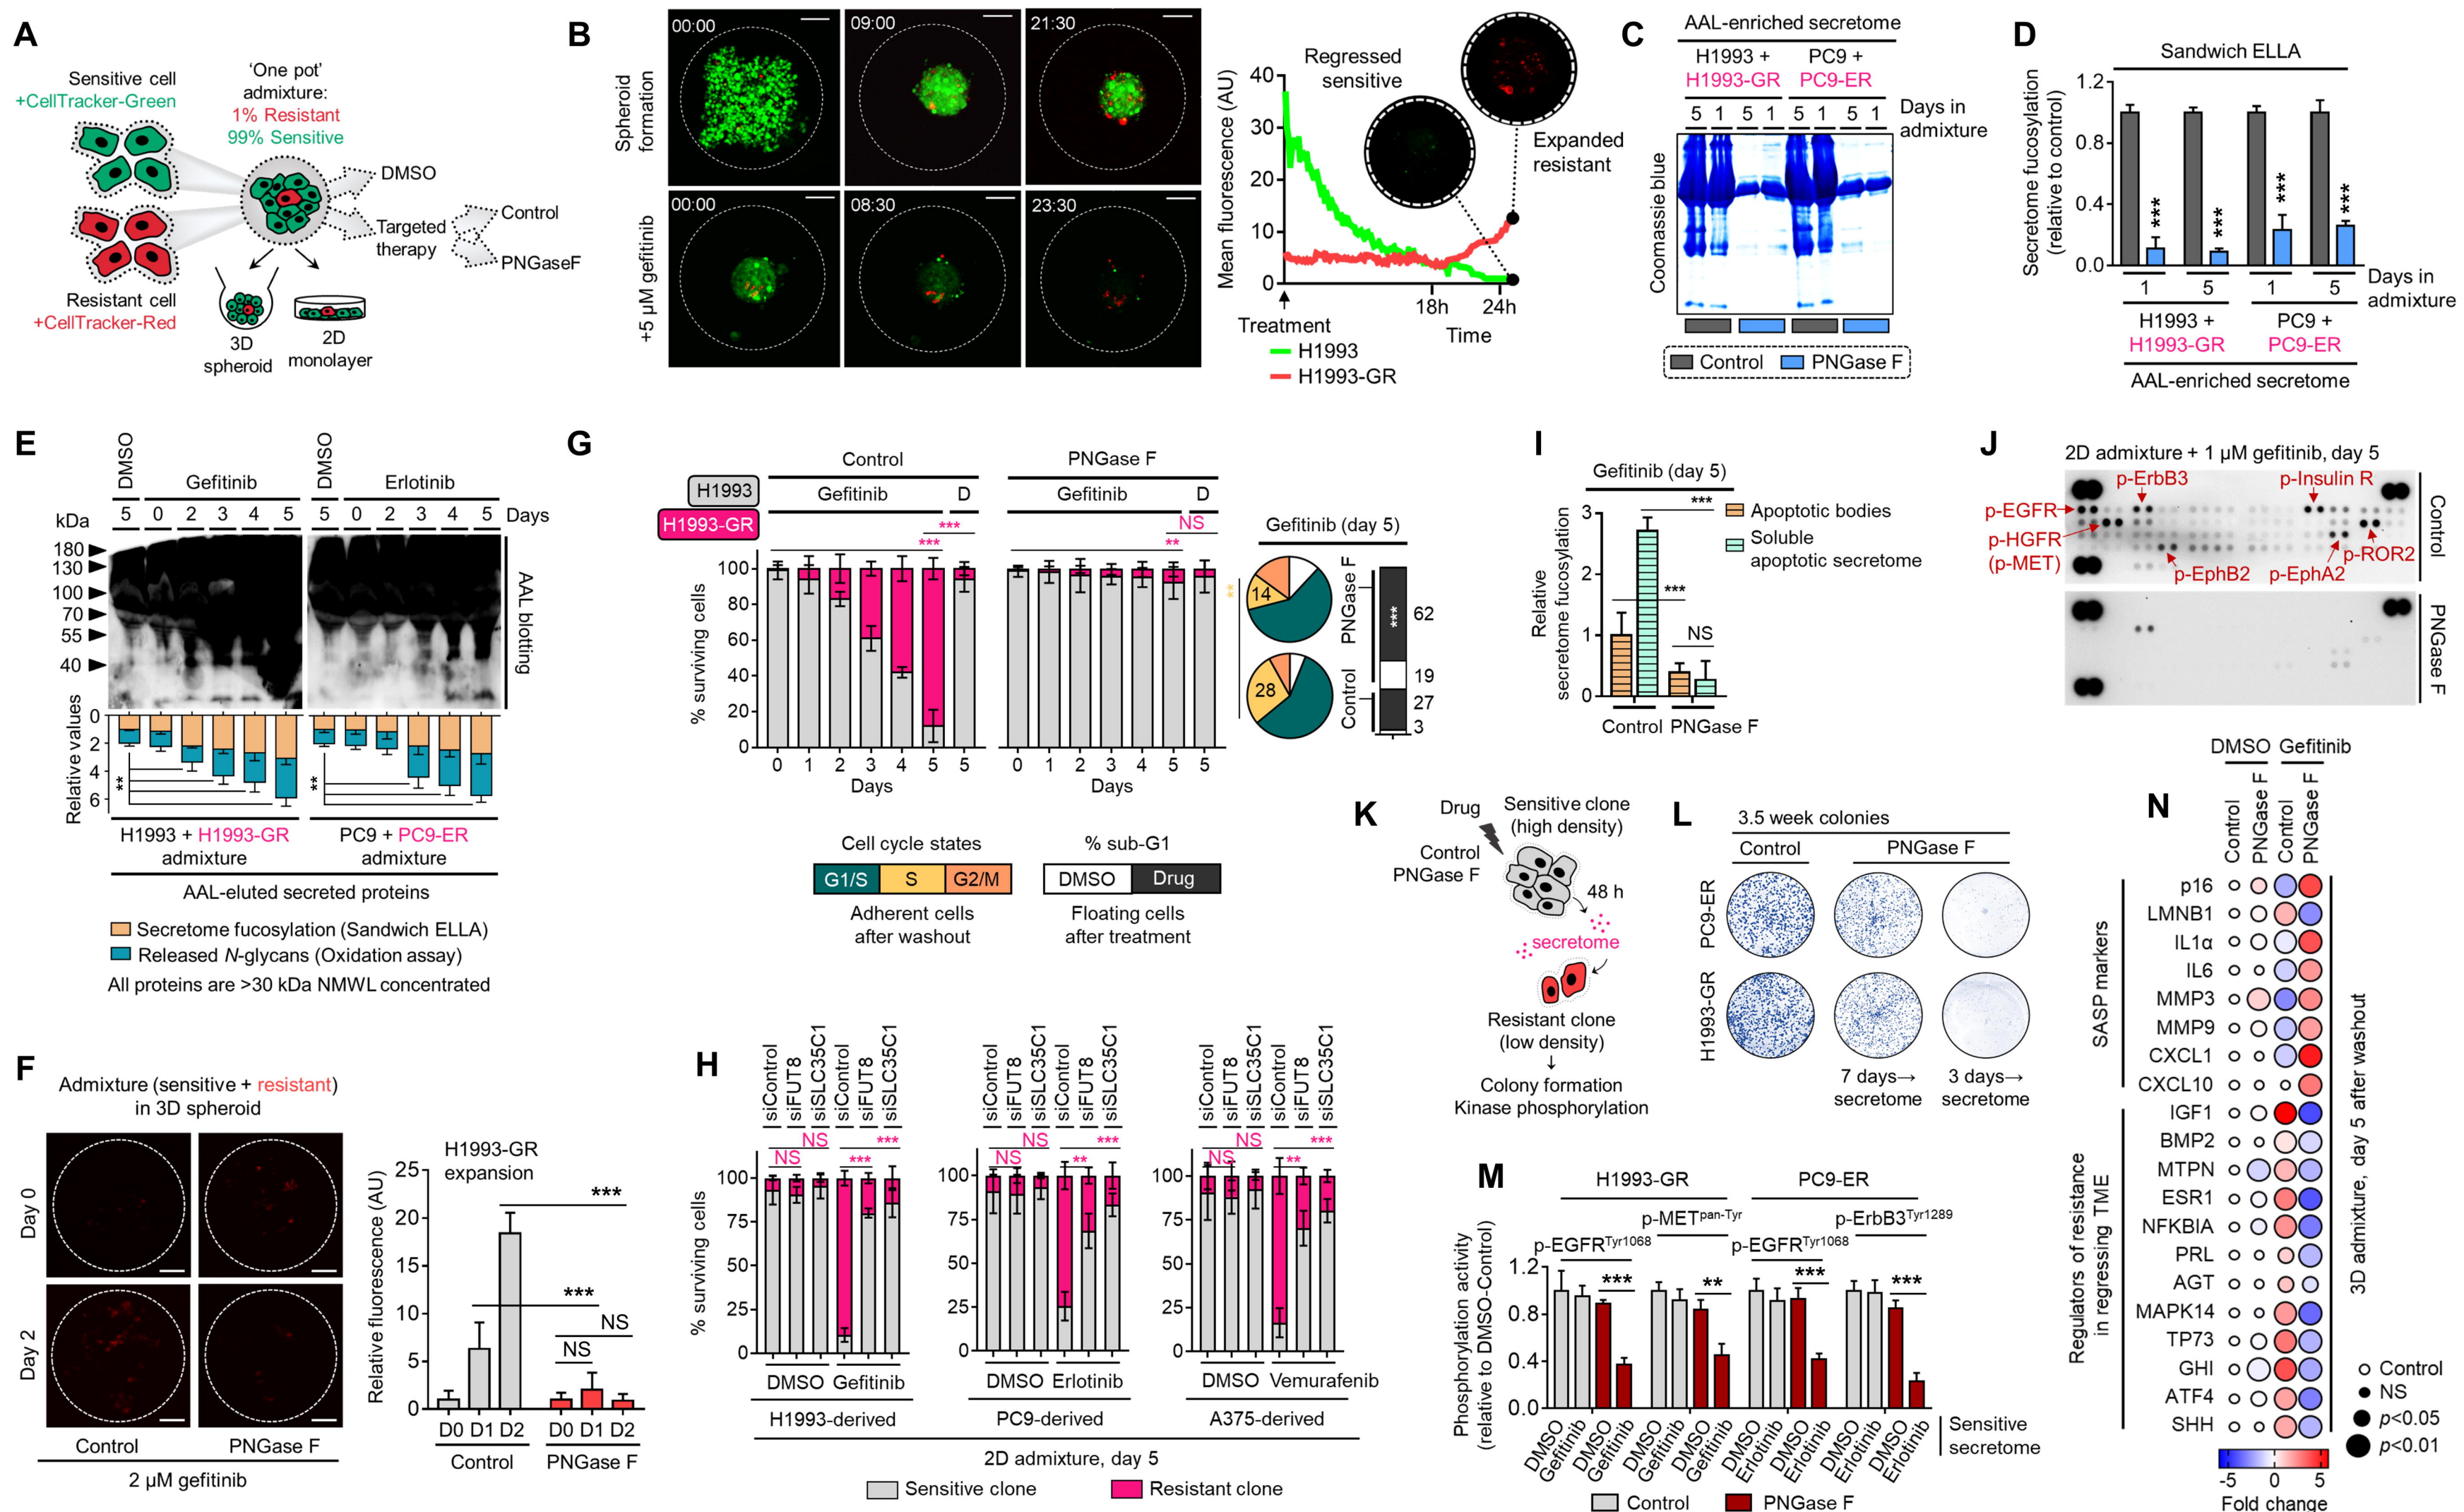

# Figure 3.

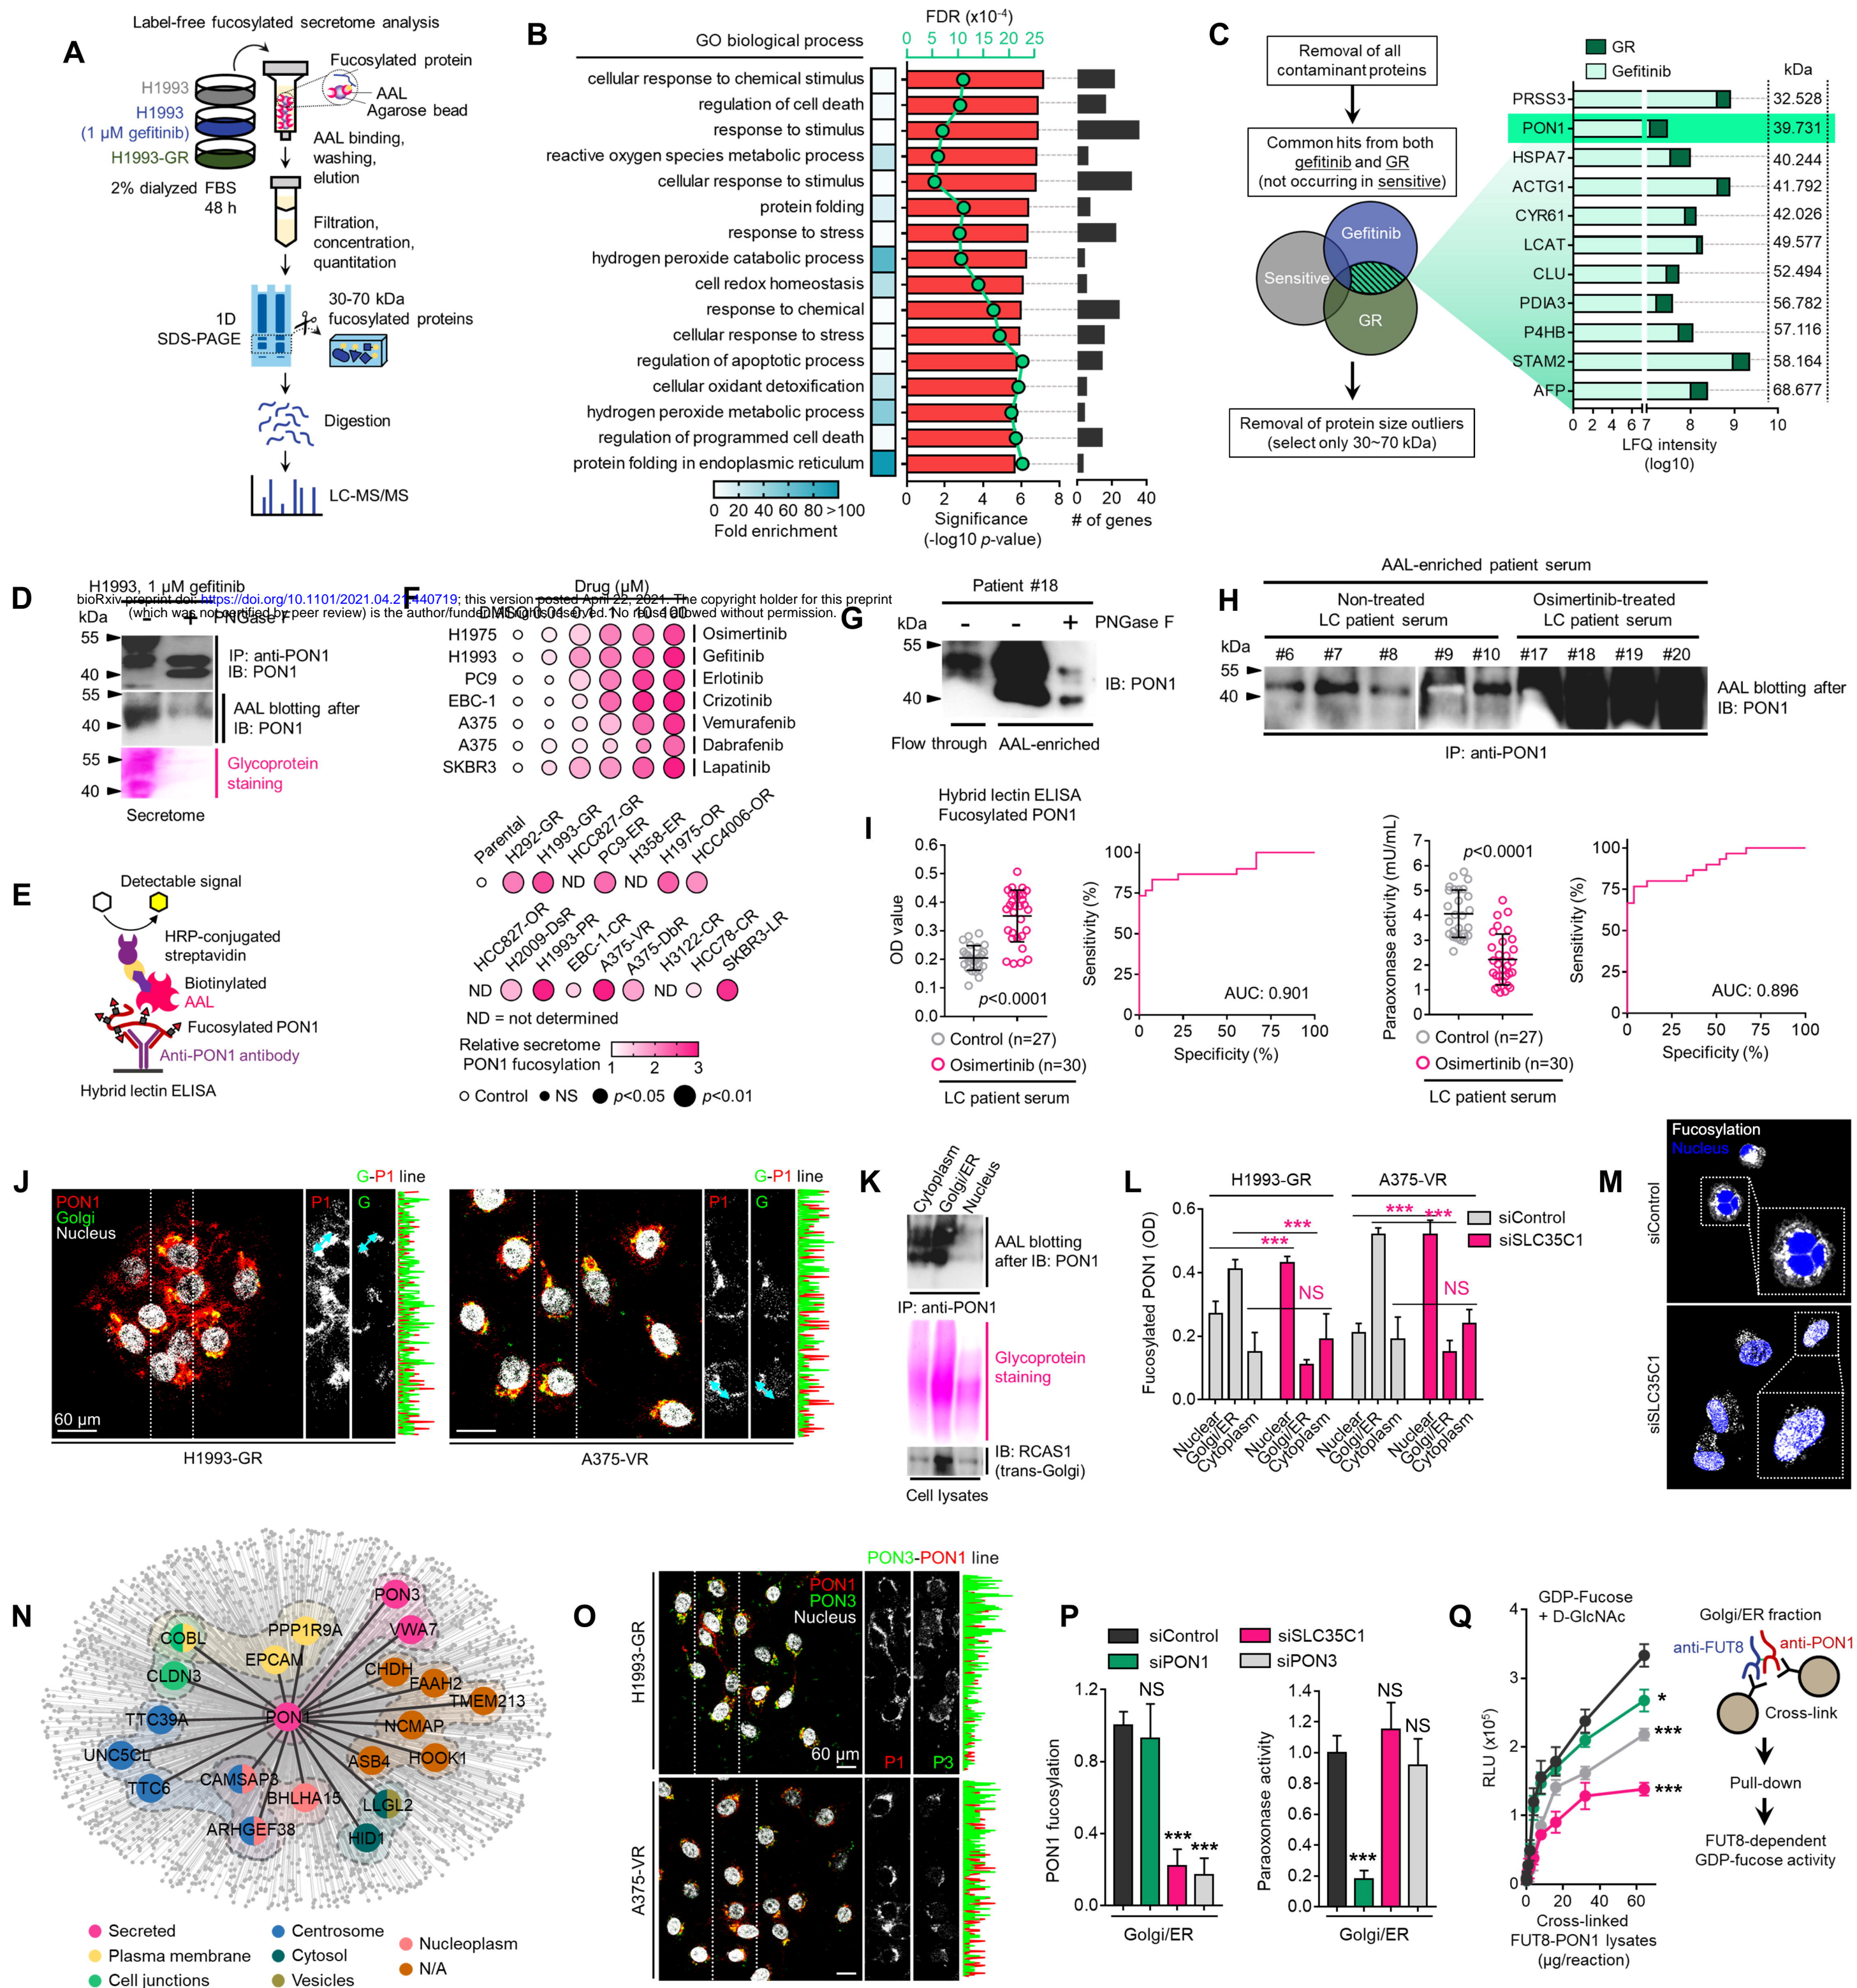

**Figure 4.**

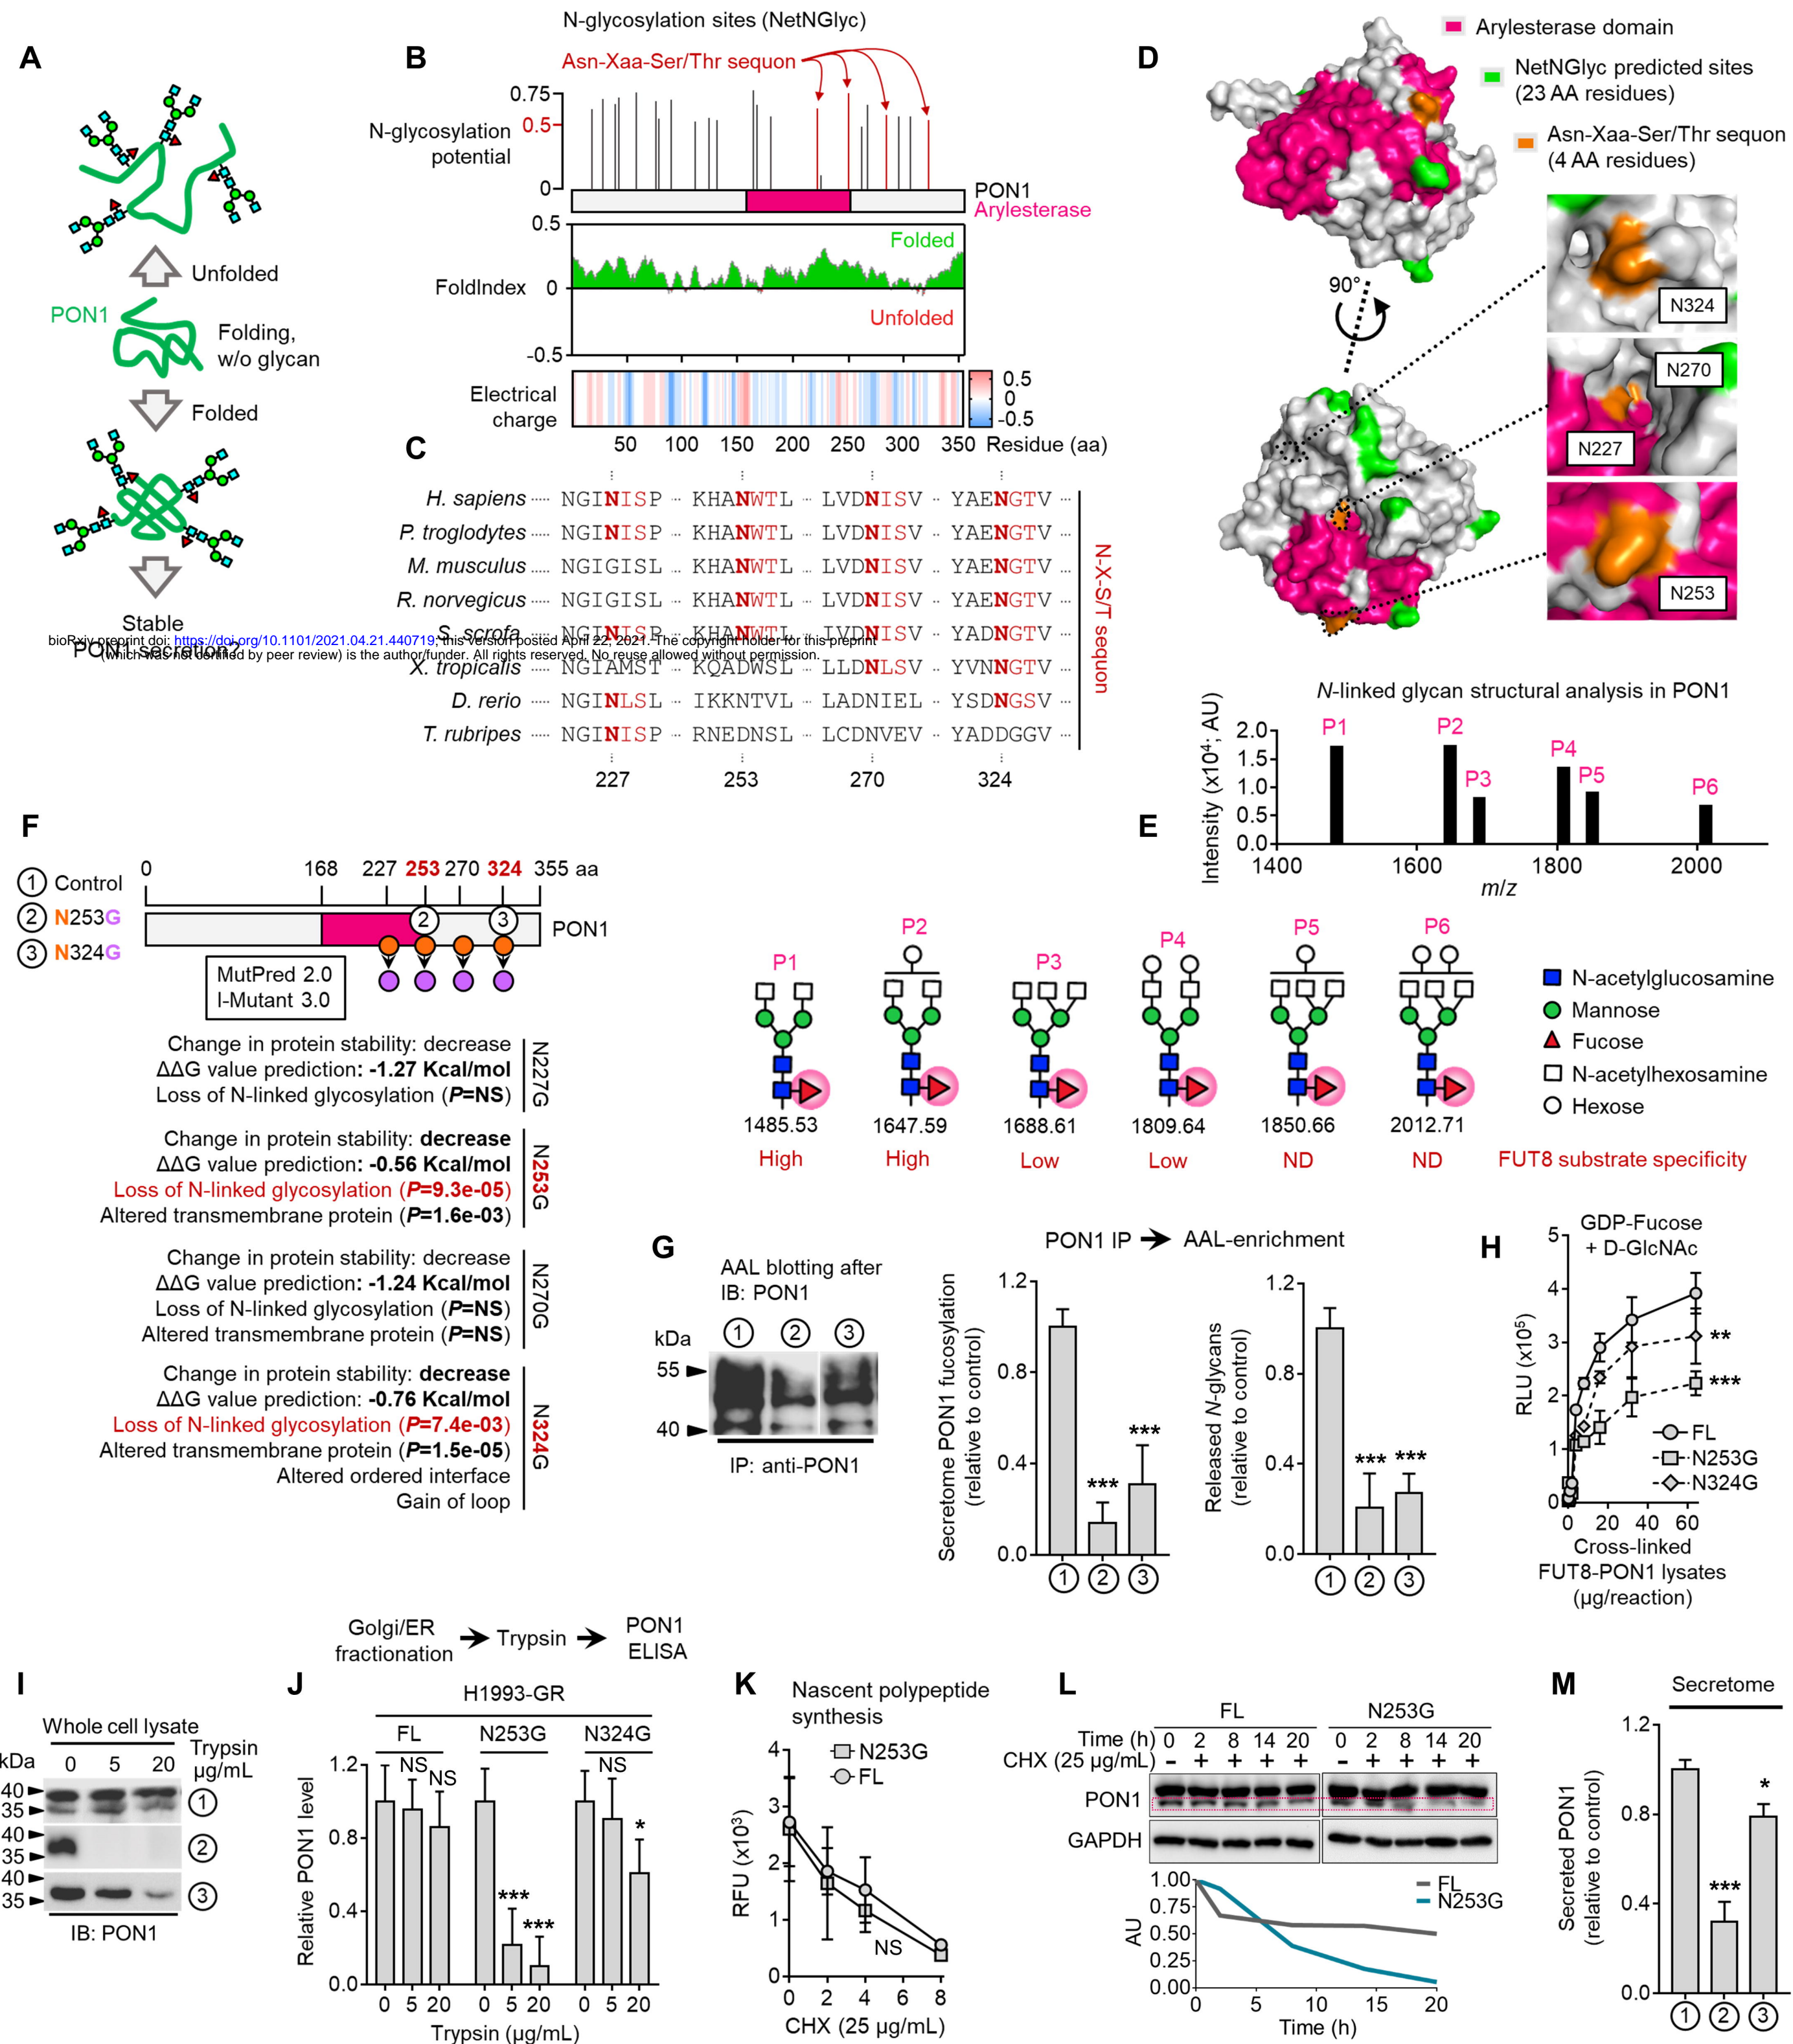

**Figure 5.**

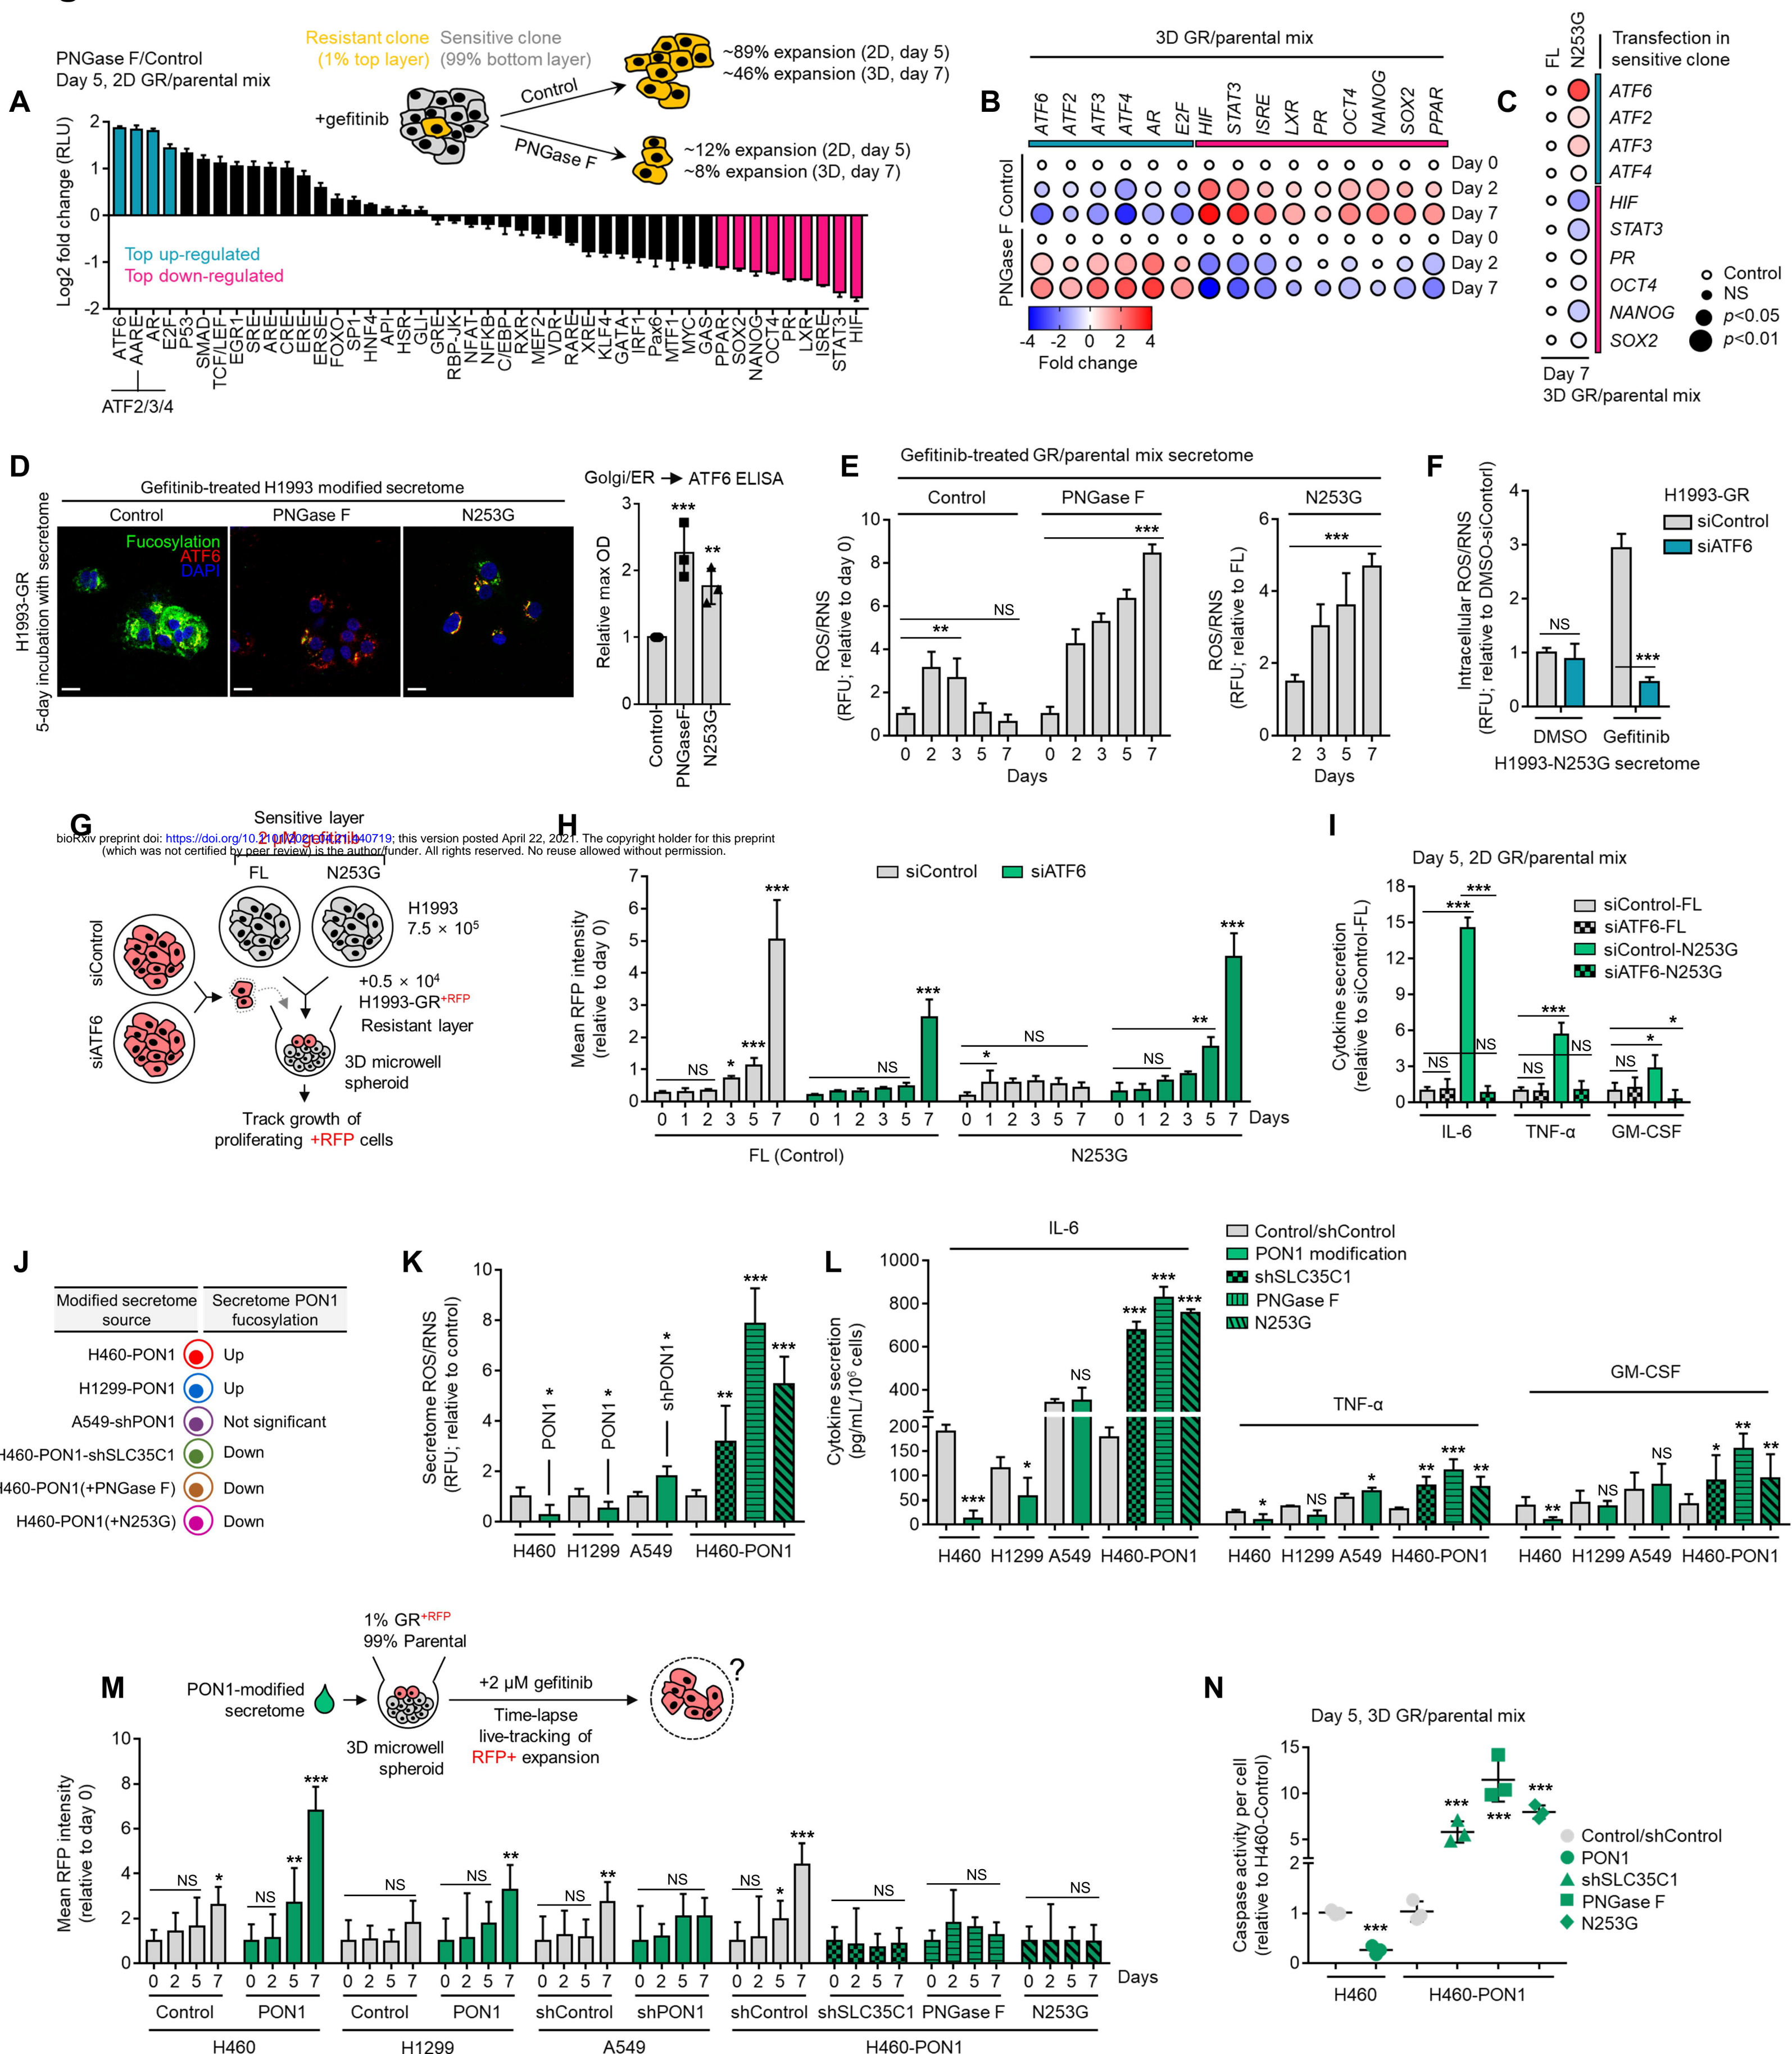

**Figure 6.**

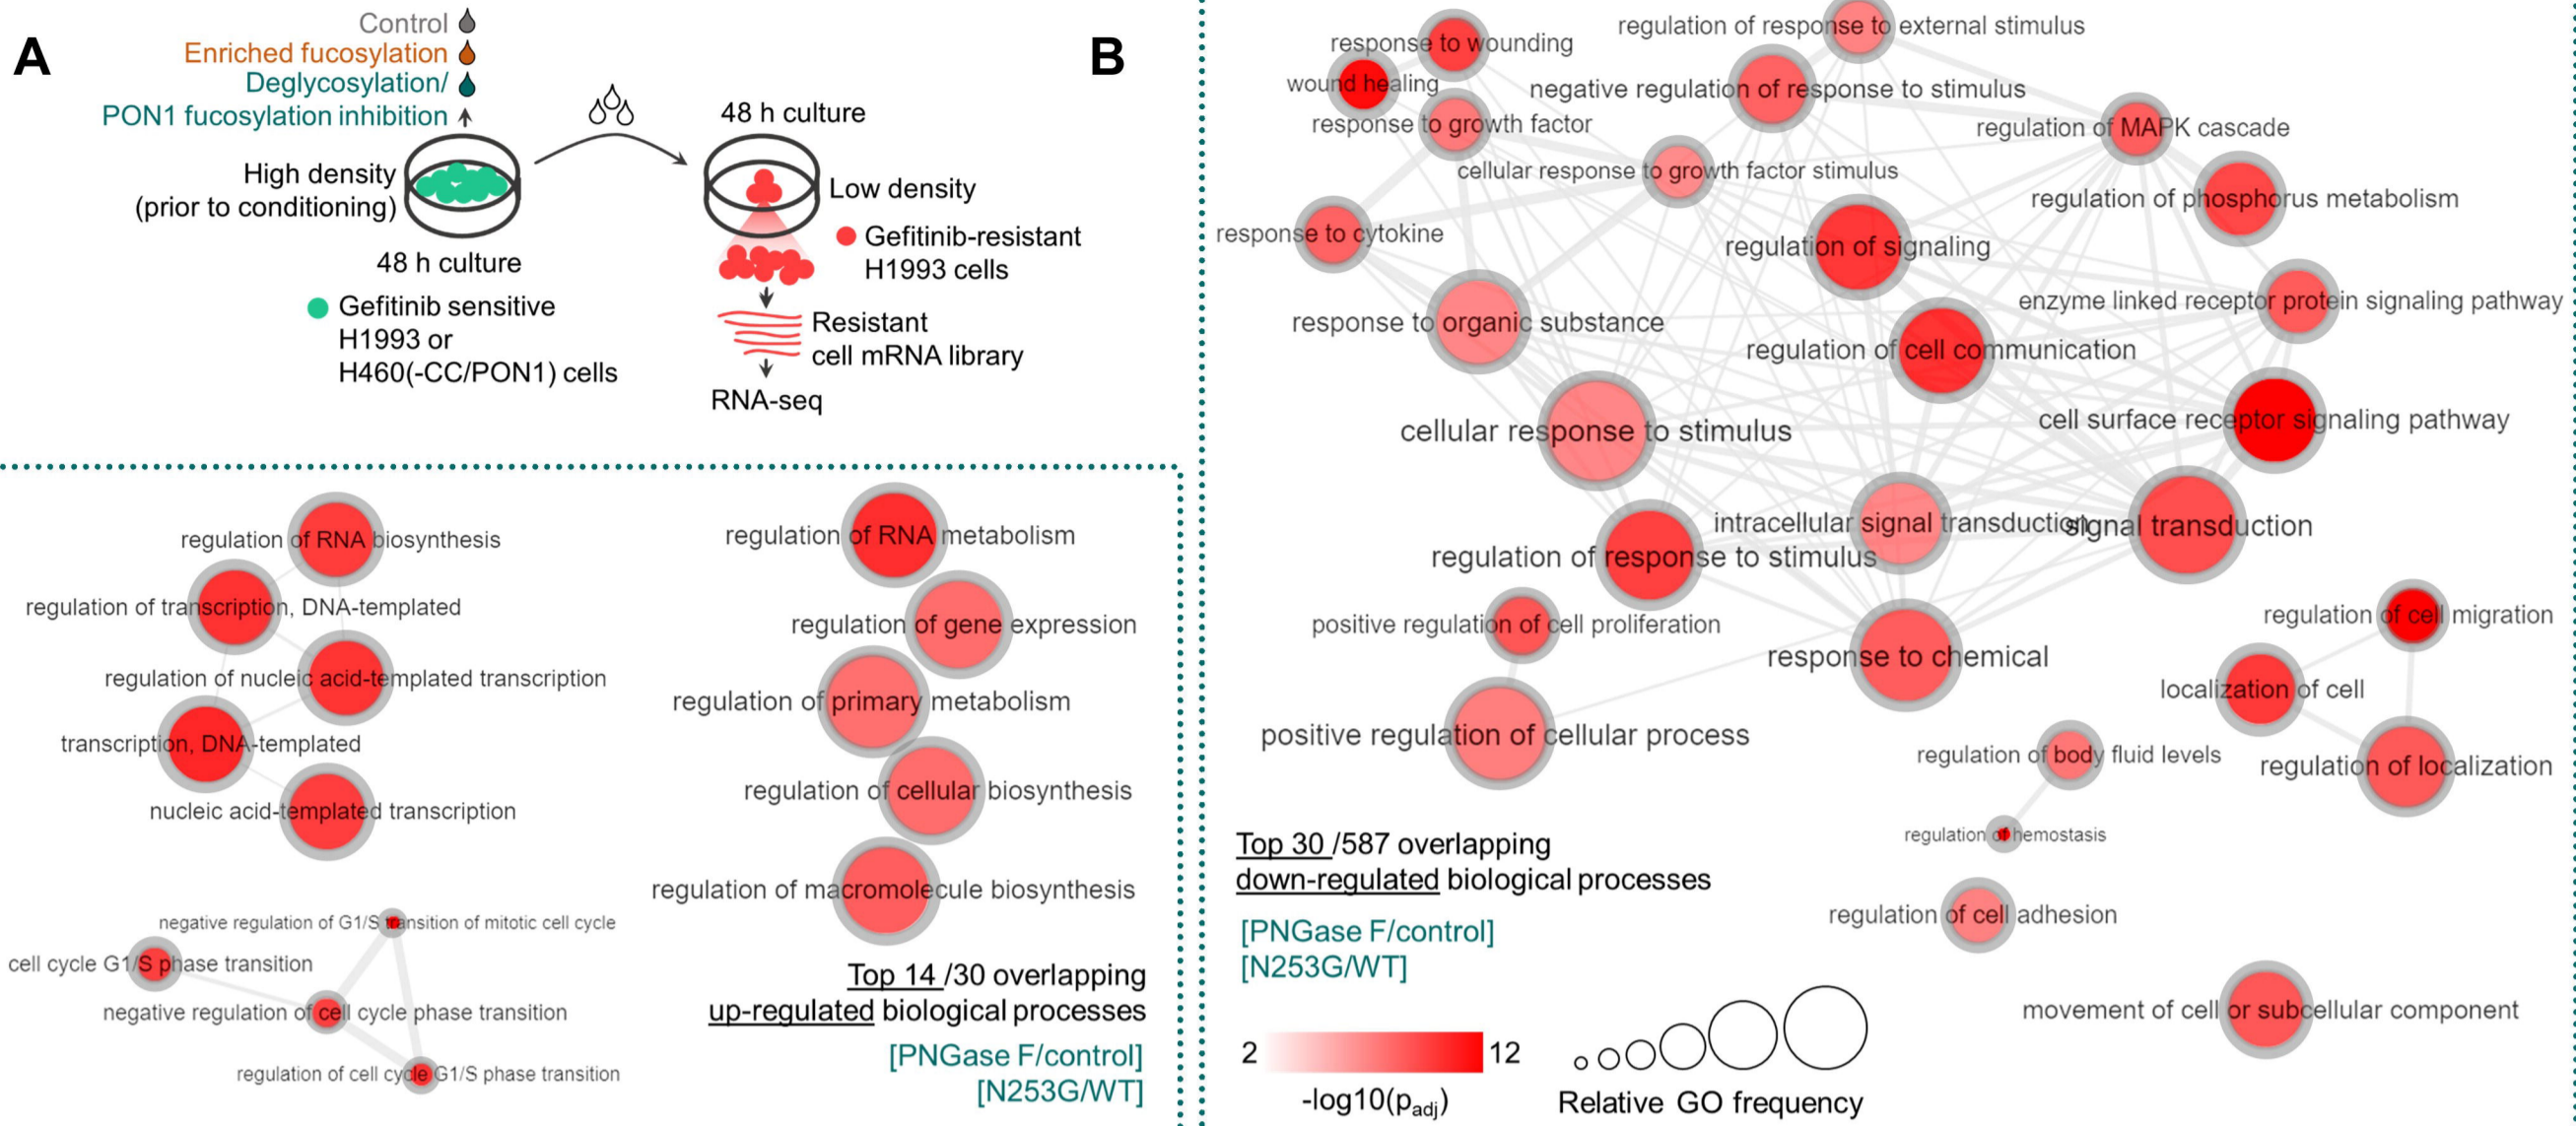

bioRxiv preprint doi: <https://doi.org/10.1101/2021.04.21.440719>; this version posted April 22, 2021. The copyright holder for this preprint (which was not certified by peer review) is the author/funder. All rights reserved. No reuse allowed without permission.

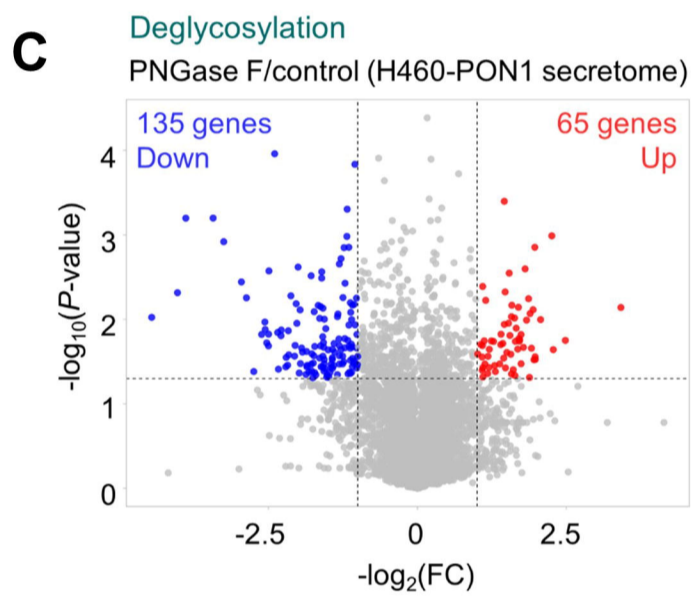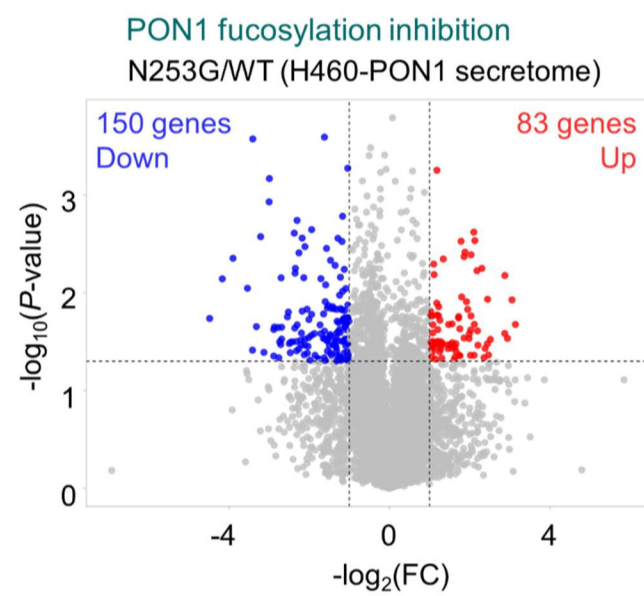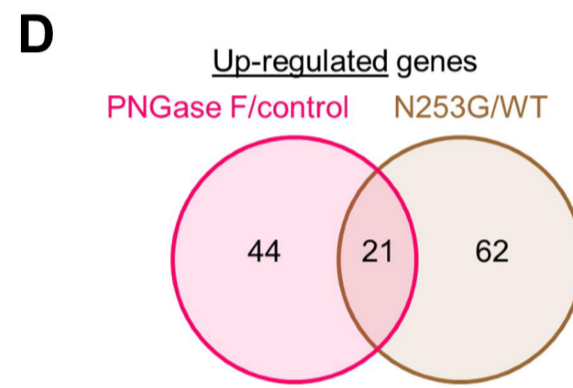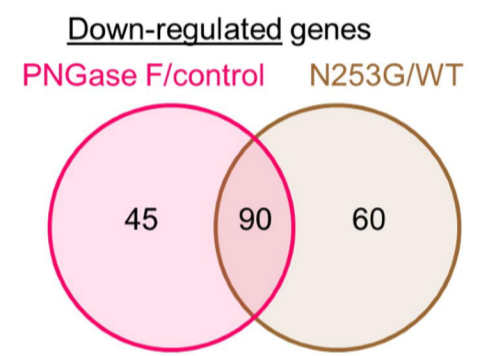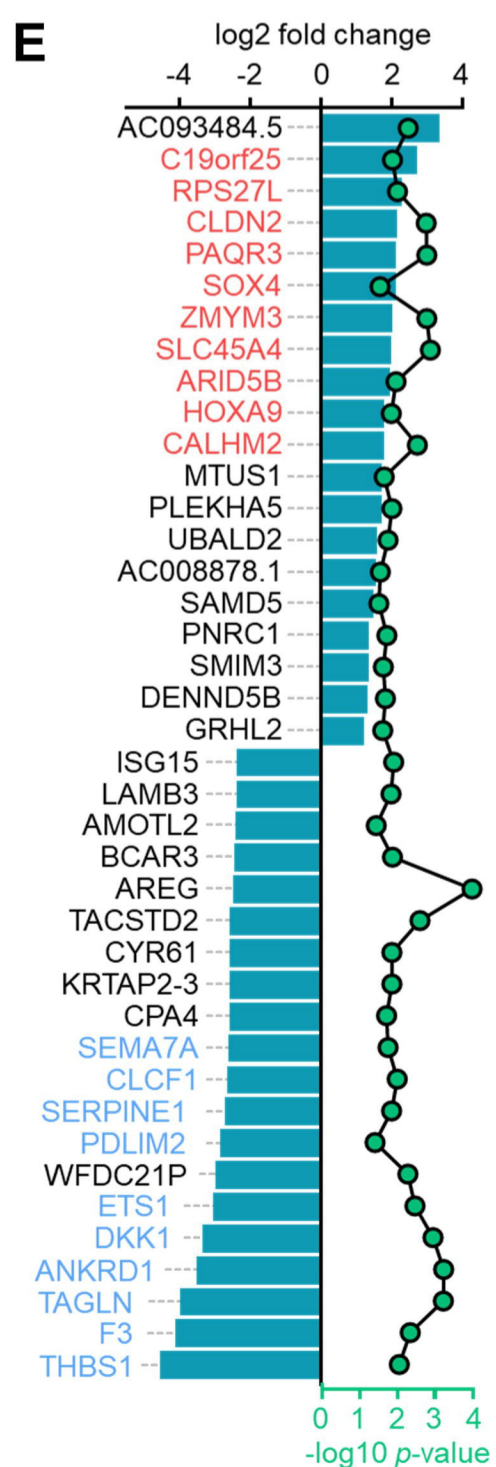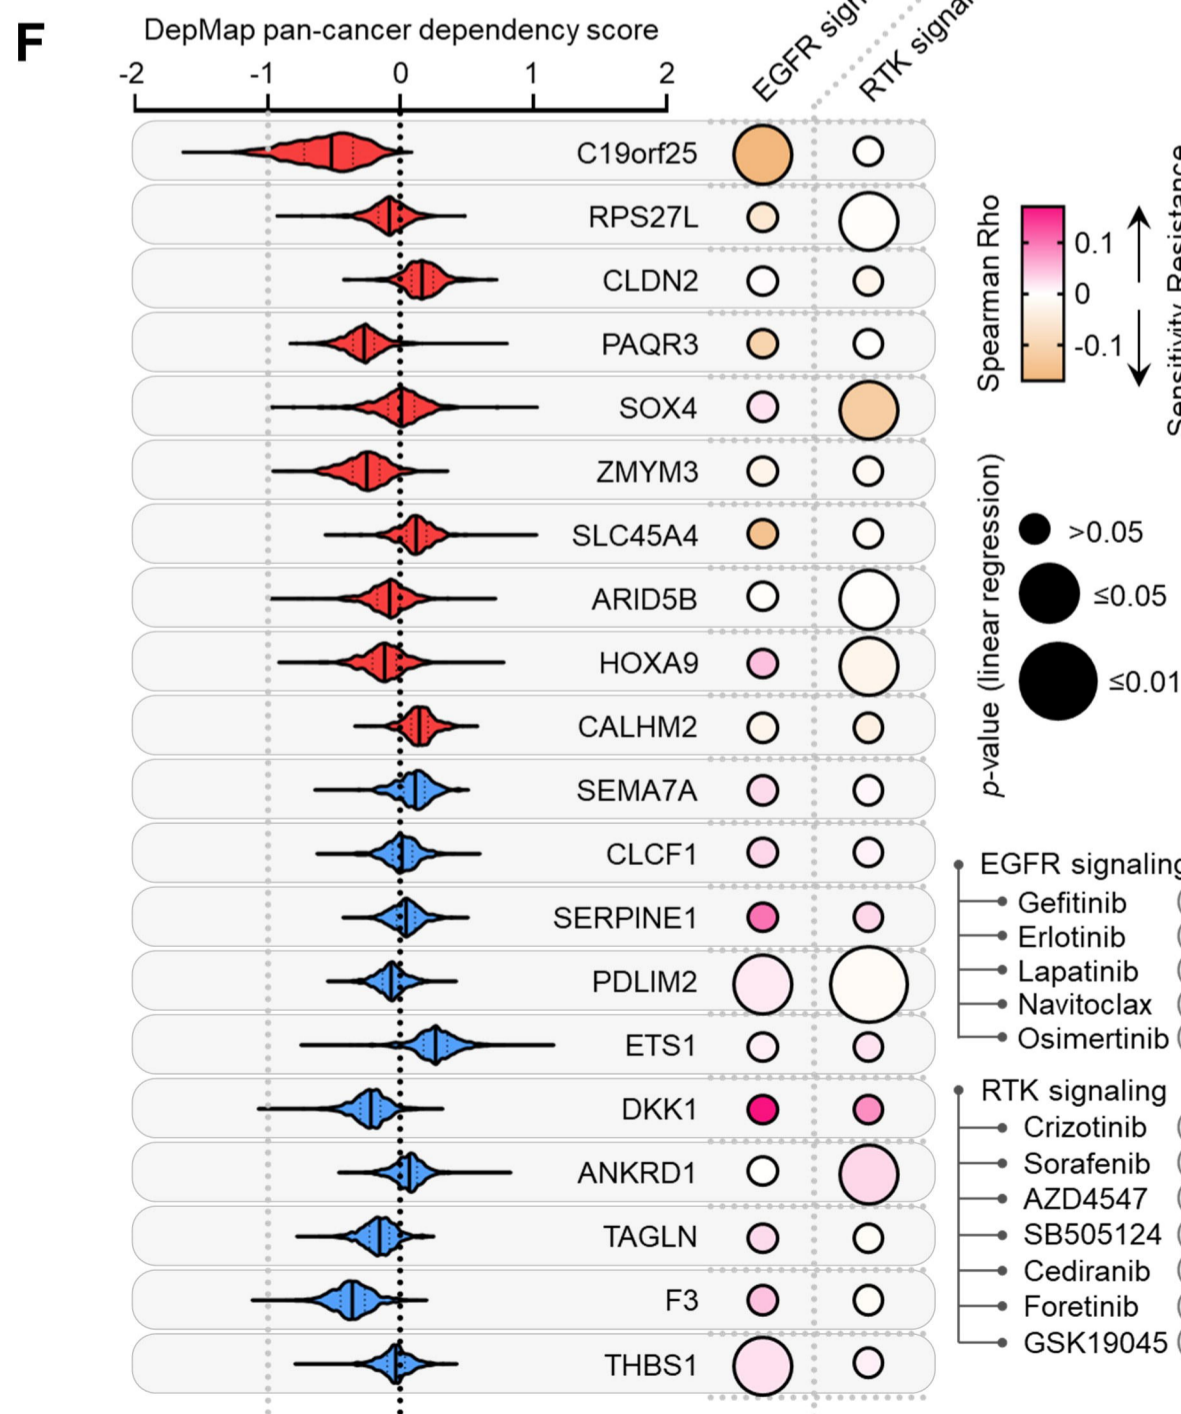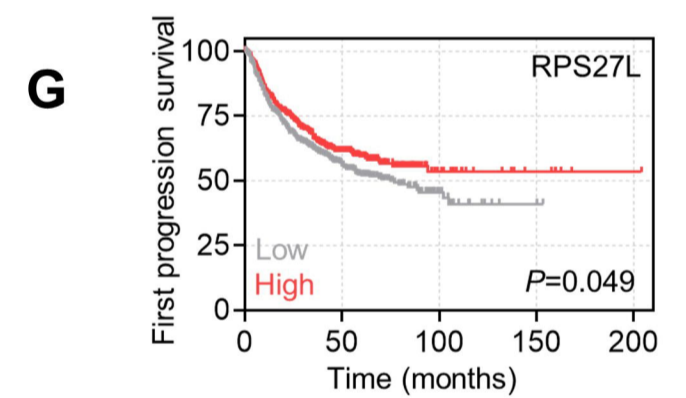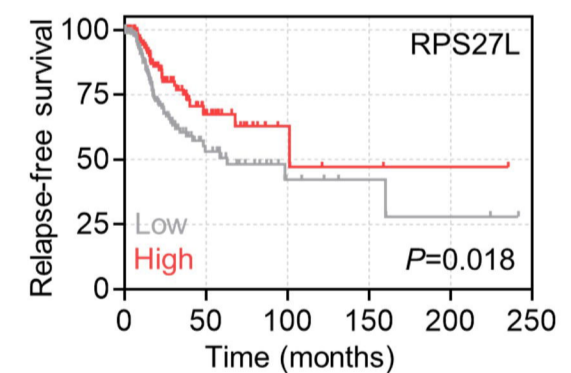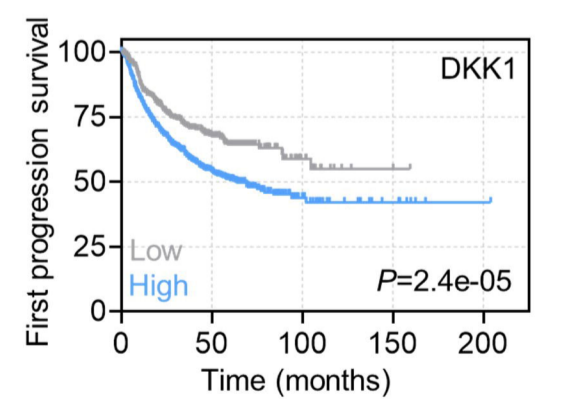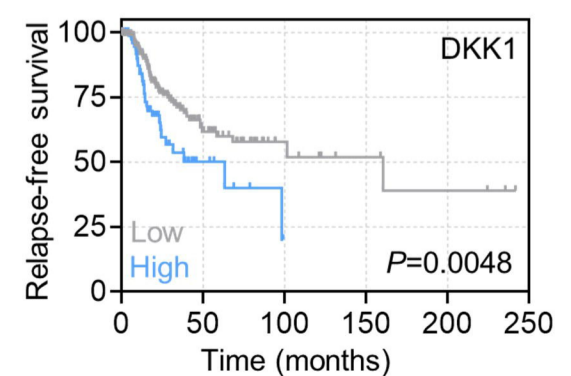

Source: https://biorxiv.org/content/10.1101/2021.04.21.440719v1.full.pdf
